# Supplementary material for: Automated sequence design of 2D wireframe DNA origami with honeycomb edges
Source: PubMed Central journal article supplement (PMC6882874; doi:10.1038/s41467-019-13457-y), 2019-11-28
Supplement: 41467_2019_13457_MOESM1_ESM.pdf [file 41467_2019_13457_MOESM1_ESM.pdf]

**Supplementary Information**

**Automated Sequence Design of 2D Wireframe DNA origami with Honeycomb Edges**

*Jun et al.*

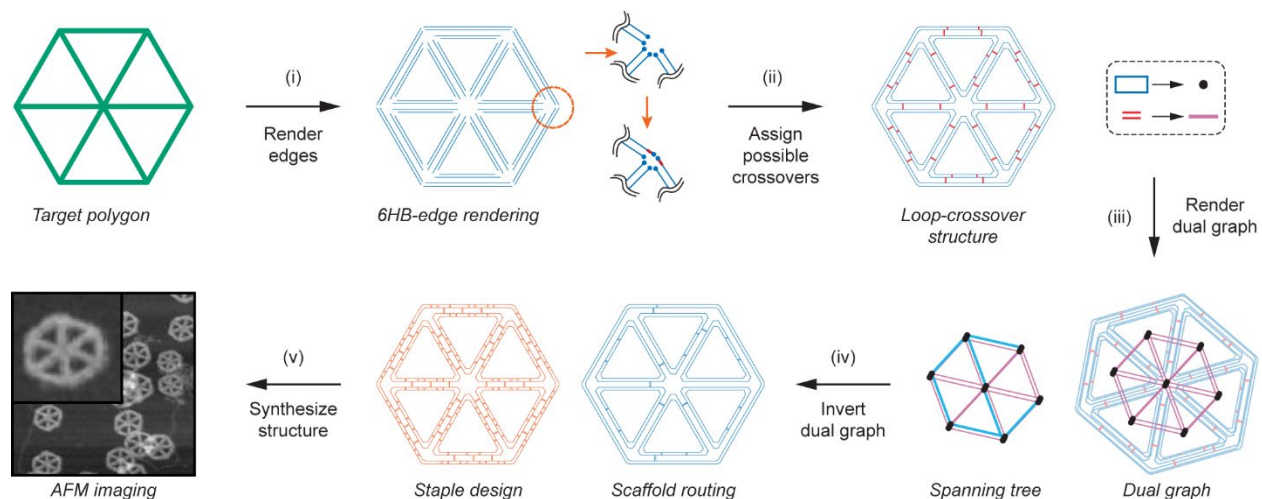

**Supplementary Figure 1** Schematic illustrating design algorithm for the 6HB-based hexagonal DNA origami. The arbitrary target geometry is based on a polygon mesh, with discretized line segments (step i) to represent six DNA duplexes per wireframe edge with the endpoints joined (step ii) to form closed loops with geometrically allowable scaffold double crossovers between them. The dual graph of the loop-crossover structure is obtained (step iii) by converting each closed scaffold loop to a node and each possible scaffold double crossover connecting them to an edge. The minimum spanning tree of the dual graph was then determined and inverted (step iv), defining the DNA scaffold routing. Staple sequences generated (step v) by the algorithm were used with the input scaffold to synthesize the 2D DNA origami in one-pot thermal annealing.

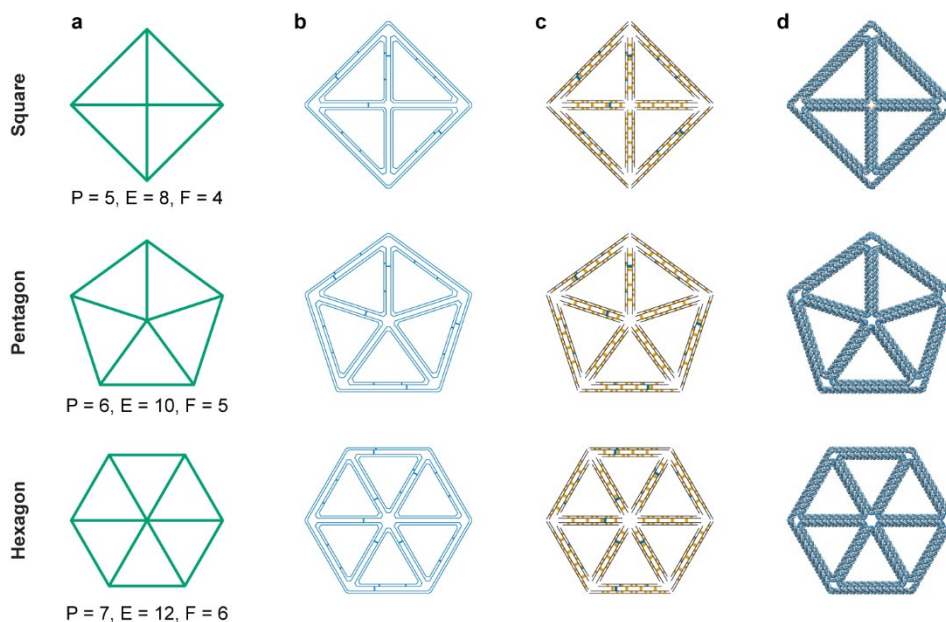

**Supplementary Figure 2** Target geometries, scaffold routing paths, crossover models, and atomic models for polygons. **a** The target geometries. The letters, P, E, and F denote the number of points, edges, and faces, respectively. **b** Scaffold routing path. The continuous blue loop is the single-stranded DNA scaffold that routes throughout the entire origami object of arbitrary shape. **c** Scaffold double crossovers (blue) determined by the spanning tree algorithm and staple double crossovers (orange). **d** Atomic model.

**Supplementary Table 1** Design parameters for polygons with the DX and 6HB edges. # indicates the type of scaffolds in **Supplementary Table 4**.

| Edge type  | Target geometry | Edge length | Scaffold        |                        |                           | Staples      |                        |                           |
|------------|-----------------|-------------|-----------------|------------------------|---------------------------|--------------|------------------------|---------------------------|
|            |                 |             | Required length | # of double crossovers | # of unpaired nucleotides | # of staples | # of double crossovers | # of unpaired nucleotides |
| <b>DX</b>  | Square          | 84-bp       | 1,756-nt (#2)   | 4                      | 20                        | 42           | 32                     | 92                        |
|            | Pentagon        | 84-bp       | 1,986-nt (#2)   | 5                      | 46                        | 48           | 35                     | 120                       |
|            | Hexagon         | 84-bp       | 2,185-nt (#2)   | 6                      | 43                        | 51           | 42                     | 120                       |
| <b>6HB</b> | Square          | 84-bp       | 5,902-nt (#1)   | 14                     | 190                       | 133          | 214                    | 244                       |
|            | Pentagon        | 84-bp       | 6,475-nt (#1)   | 17                     | 125                       | 154          | 233                    | 352                       |
|            | Hexagon         | 84-bp       | 7,157-nt (#1)   | 20                     | 95                        | 168          | 262                    | 382                       |
|            | Hexagon         | 63-bp       | 5,645-nt (#1)   | 20                     | 95                        | 123          | 190                    | 382                       |

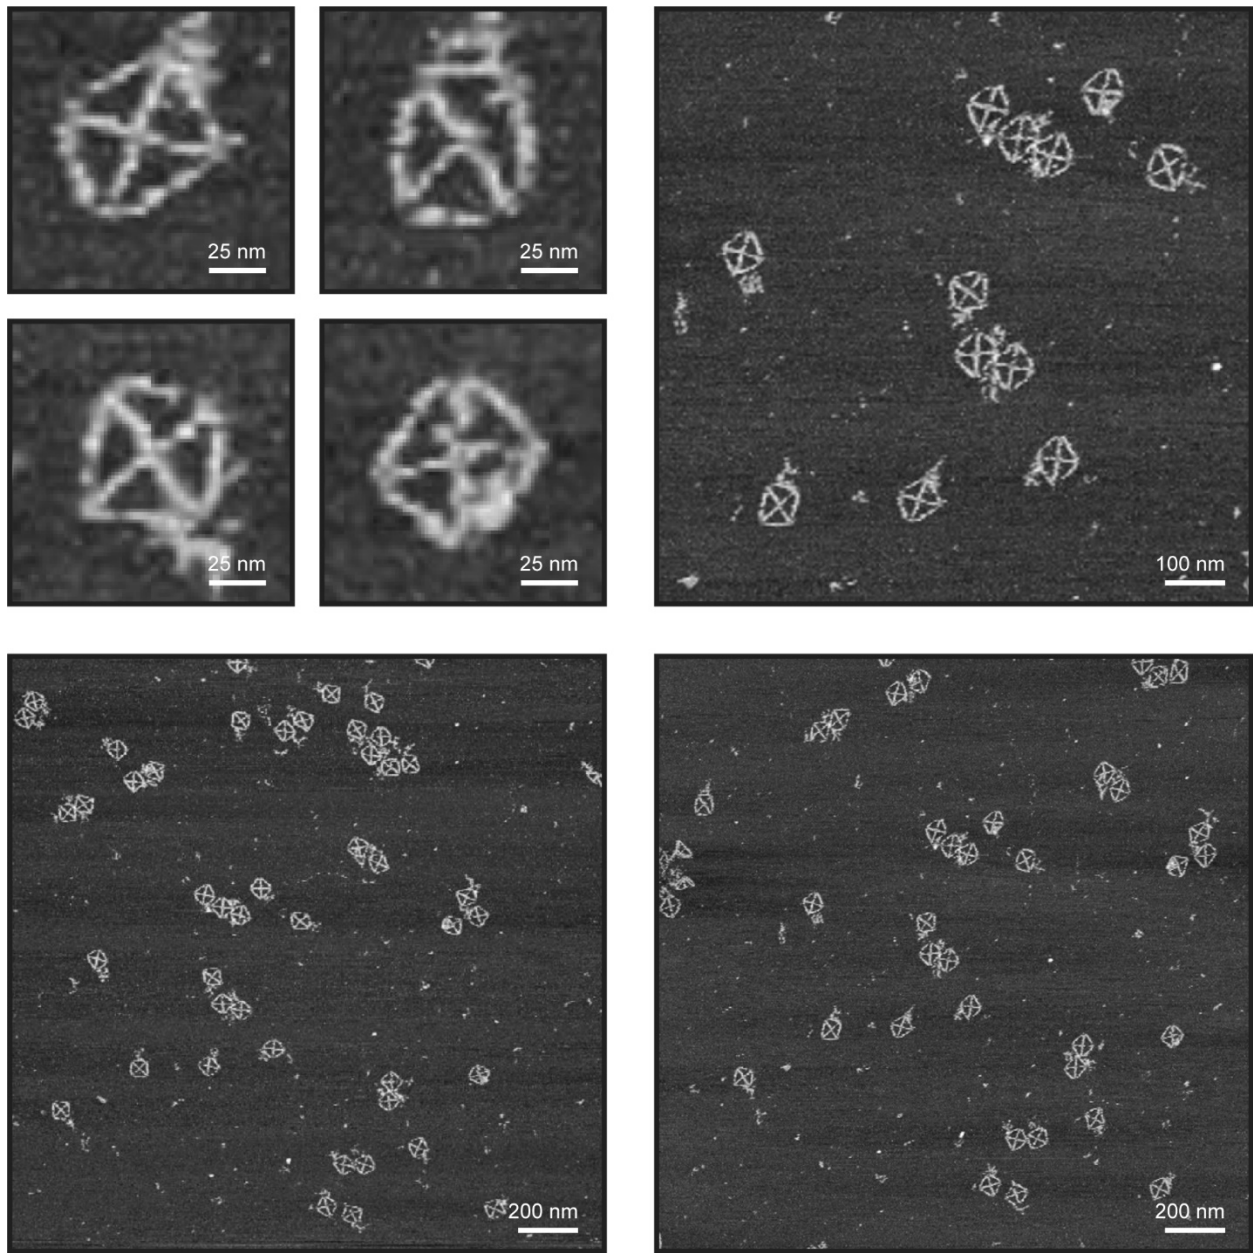

**Supplementary Figure 3** AFM imaging of DX-based square DNA origami of 84-bp edge-length.

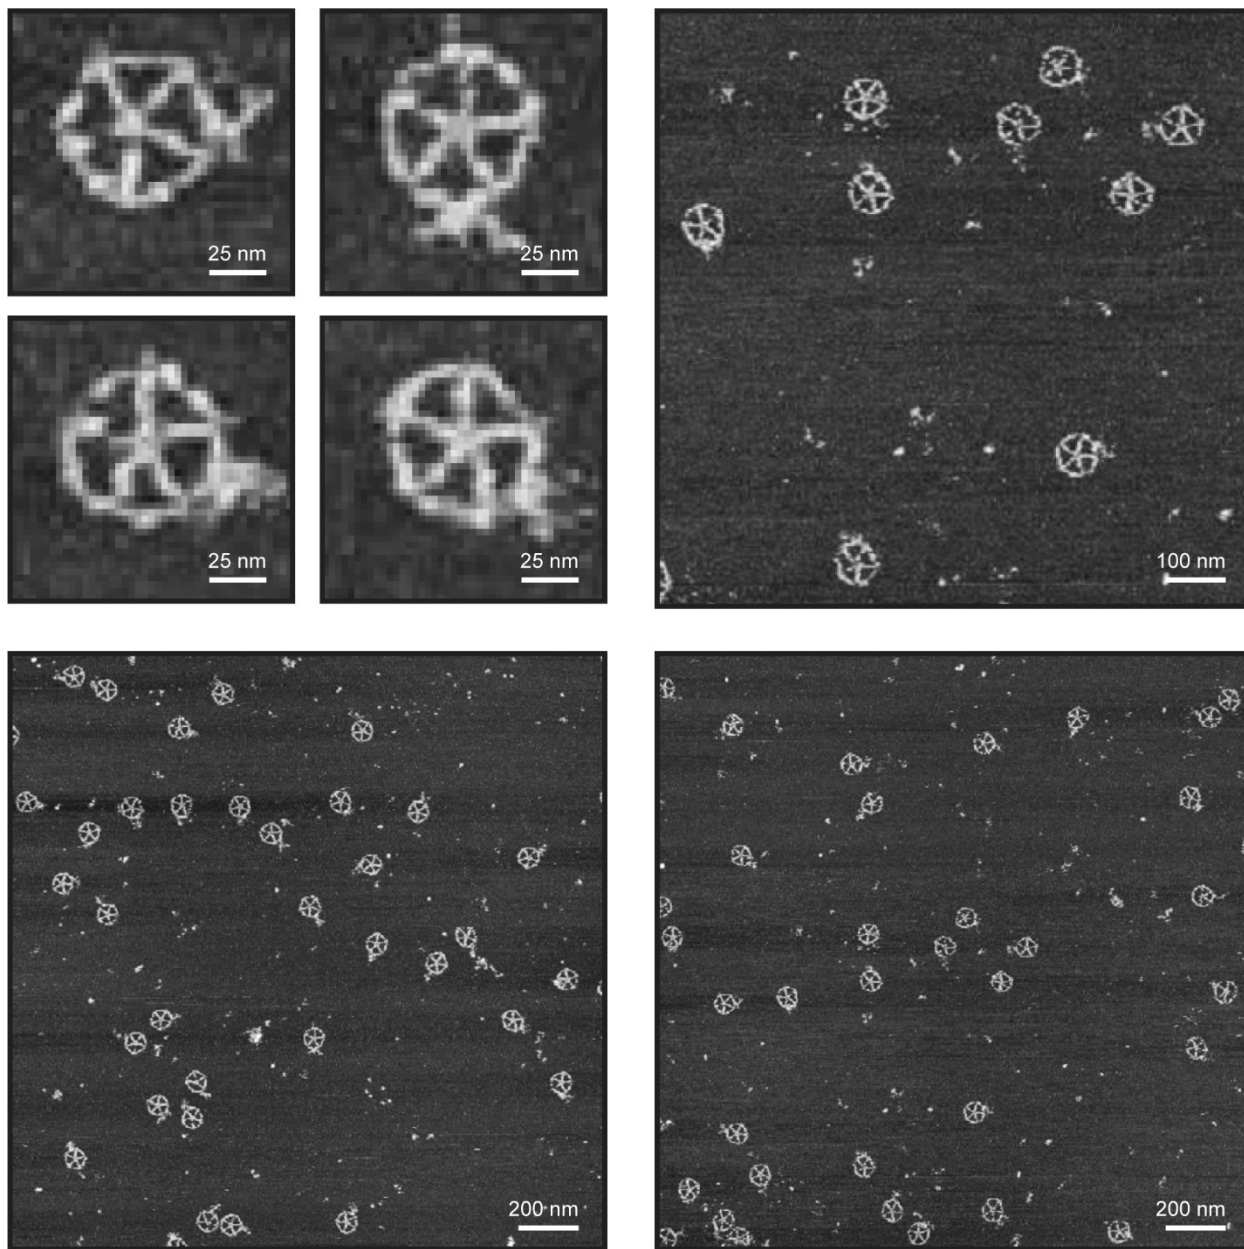

**Supplementary Figure 4** AFM imaging of DX-based pentagonal DNA origami of 84-bp edge-length.

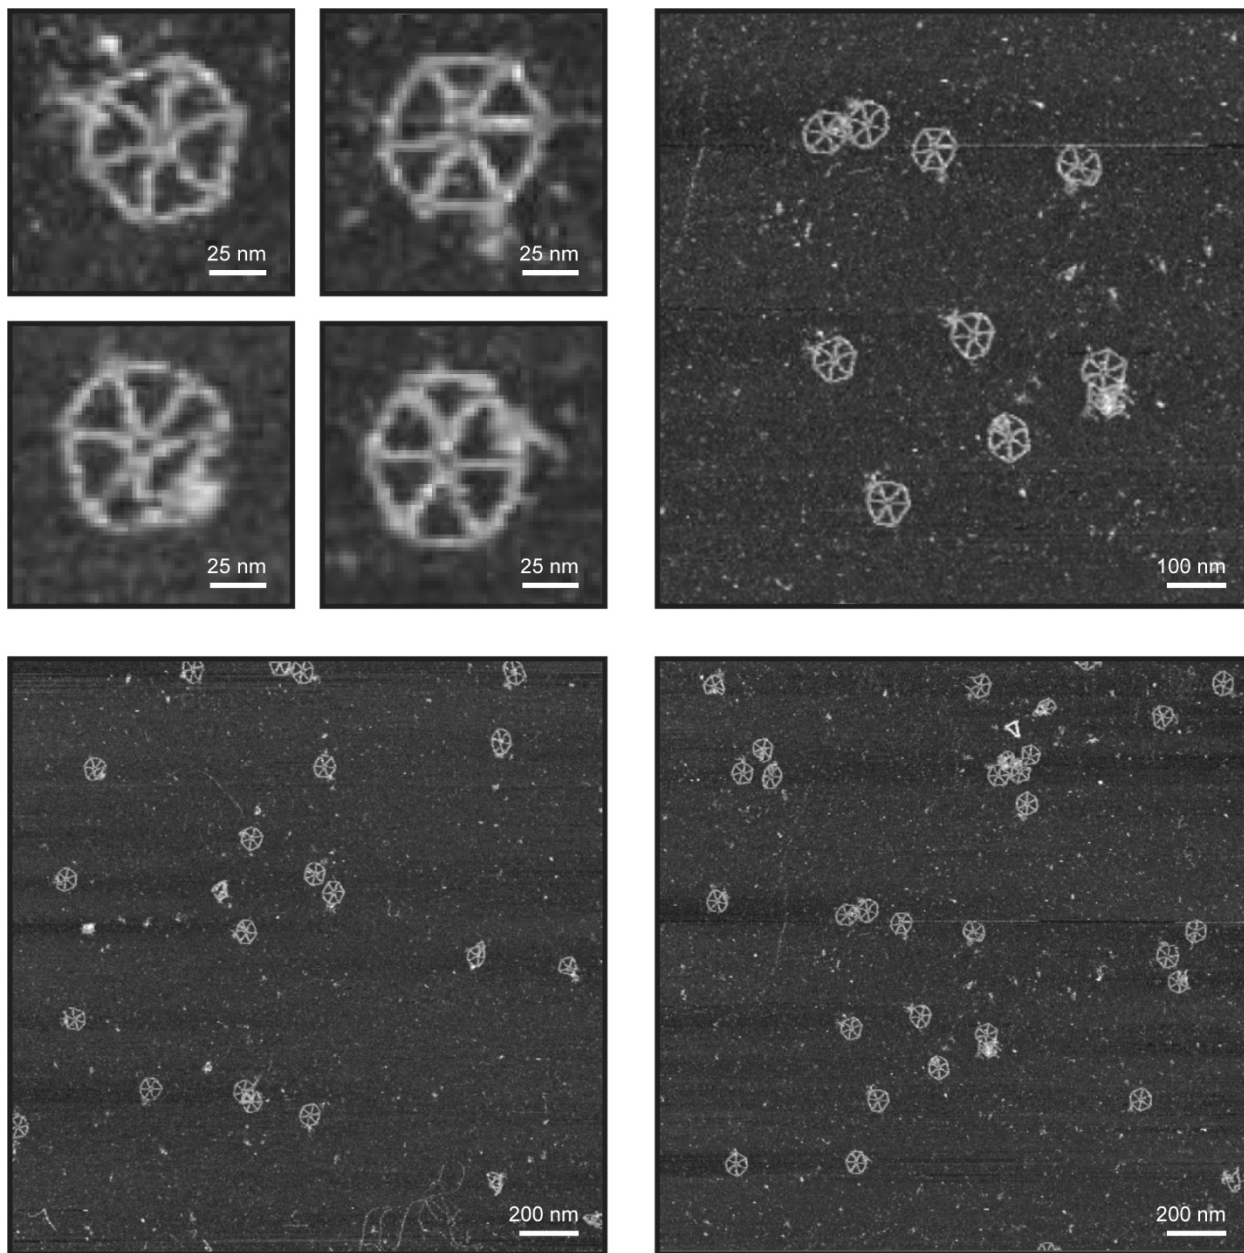

**Supplementary Figure 5** AFM imaging of DX-based hexagonal DNA origami of 84-edge-length.

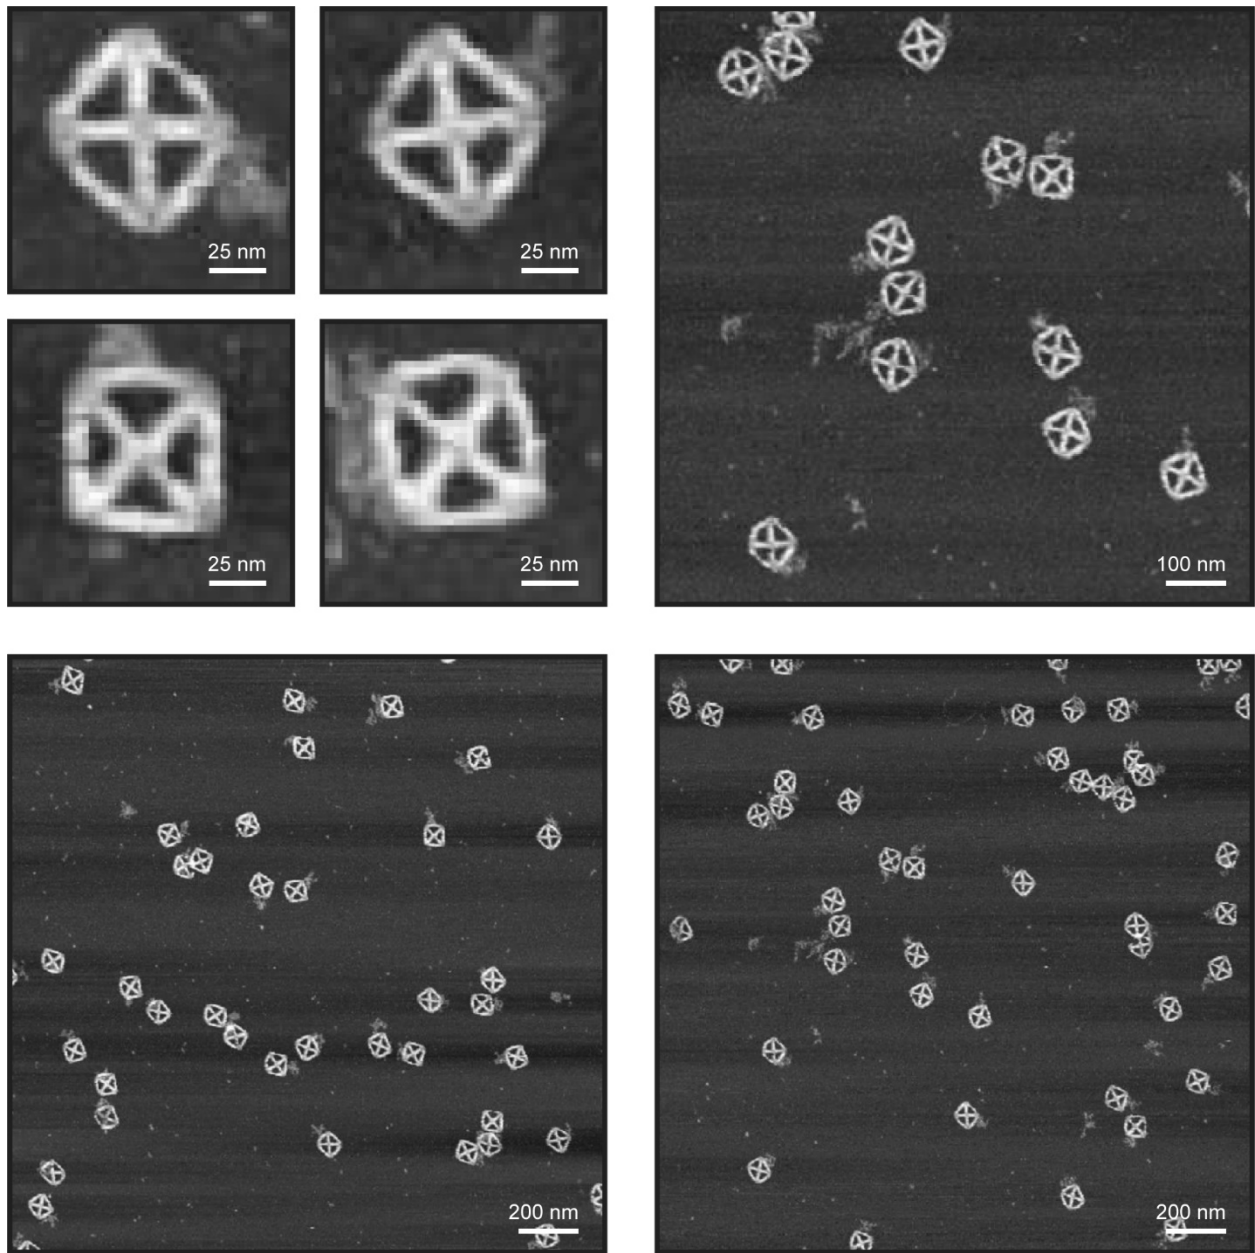

**Supplementary Figure 6** AFM imaging of 6HB-based square DNA origami of 84-bp edge-length.

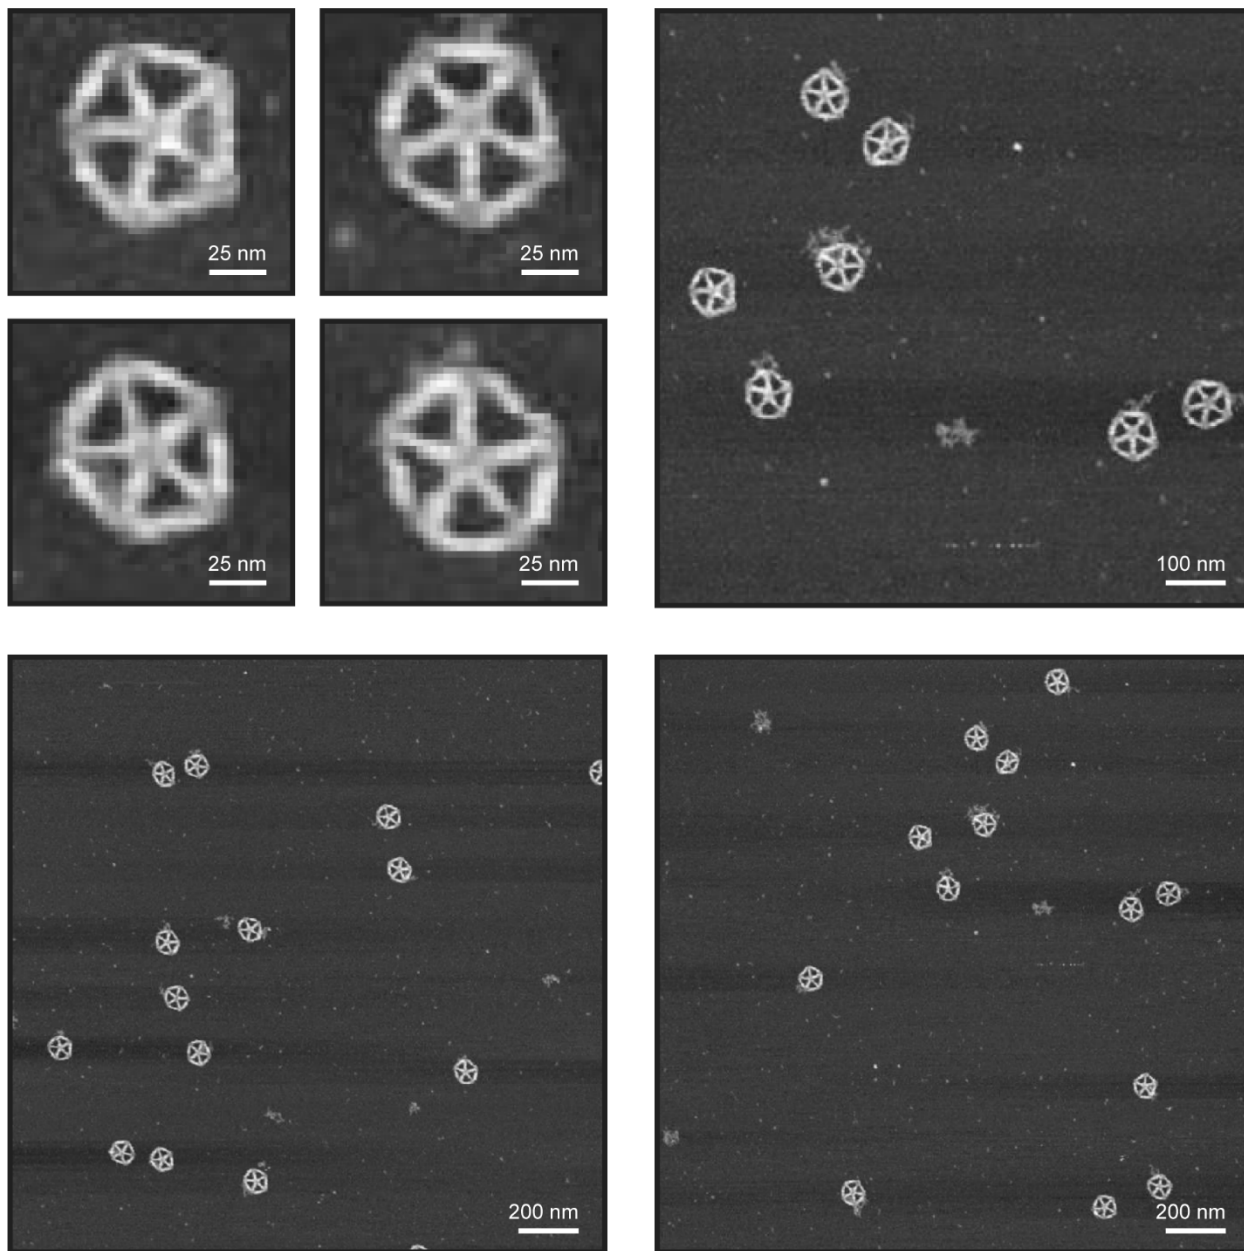

**Supplementary Figure 7** AFM imaging of 6HB-based pentagonal DNA origami of 84-bp edge-length.



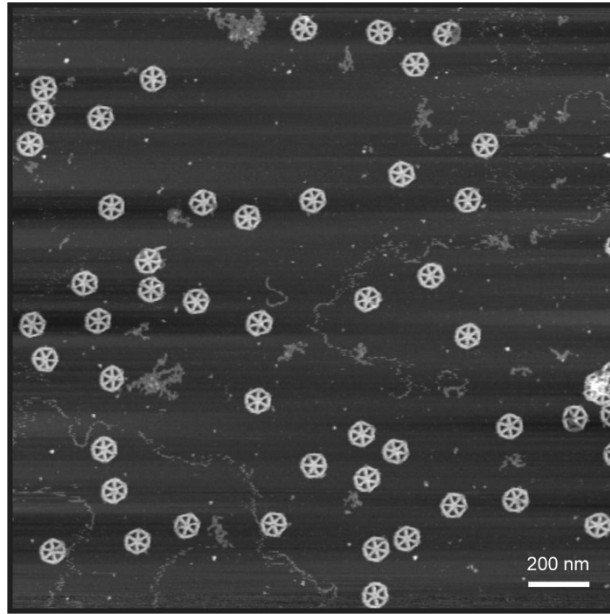

**Supplementary Figure 8** AFM imaging of 6HB-based hexagonal DNA origami of 84-edge-length.

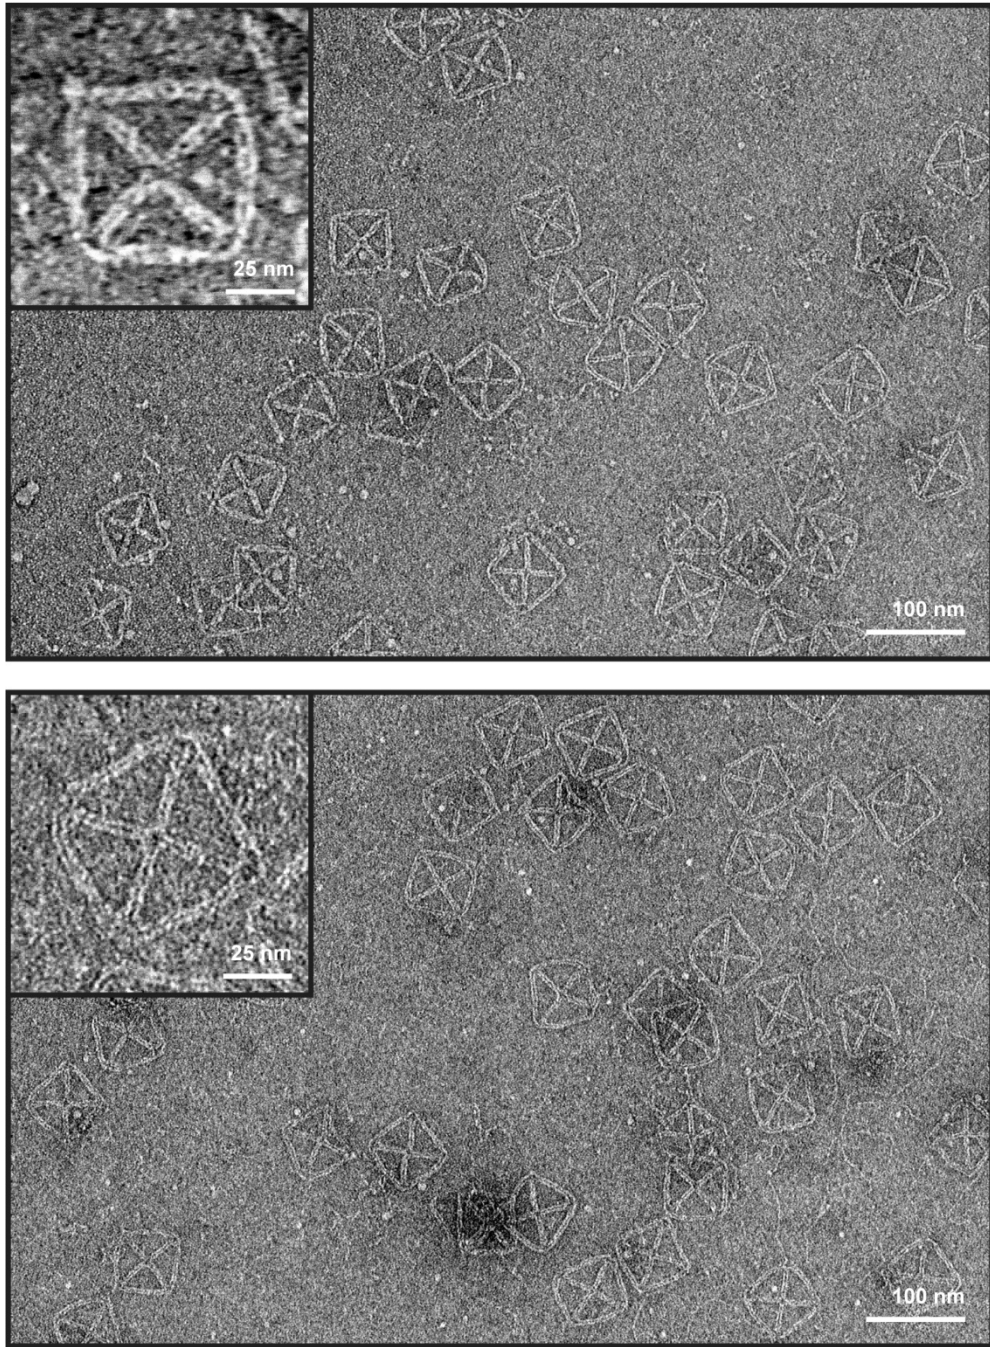

**Supplementary Figure 9** TEM imaging of 6HB-based square DNA origami of 84-bp edge-length.

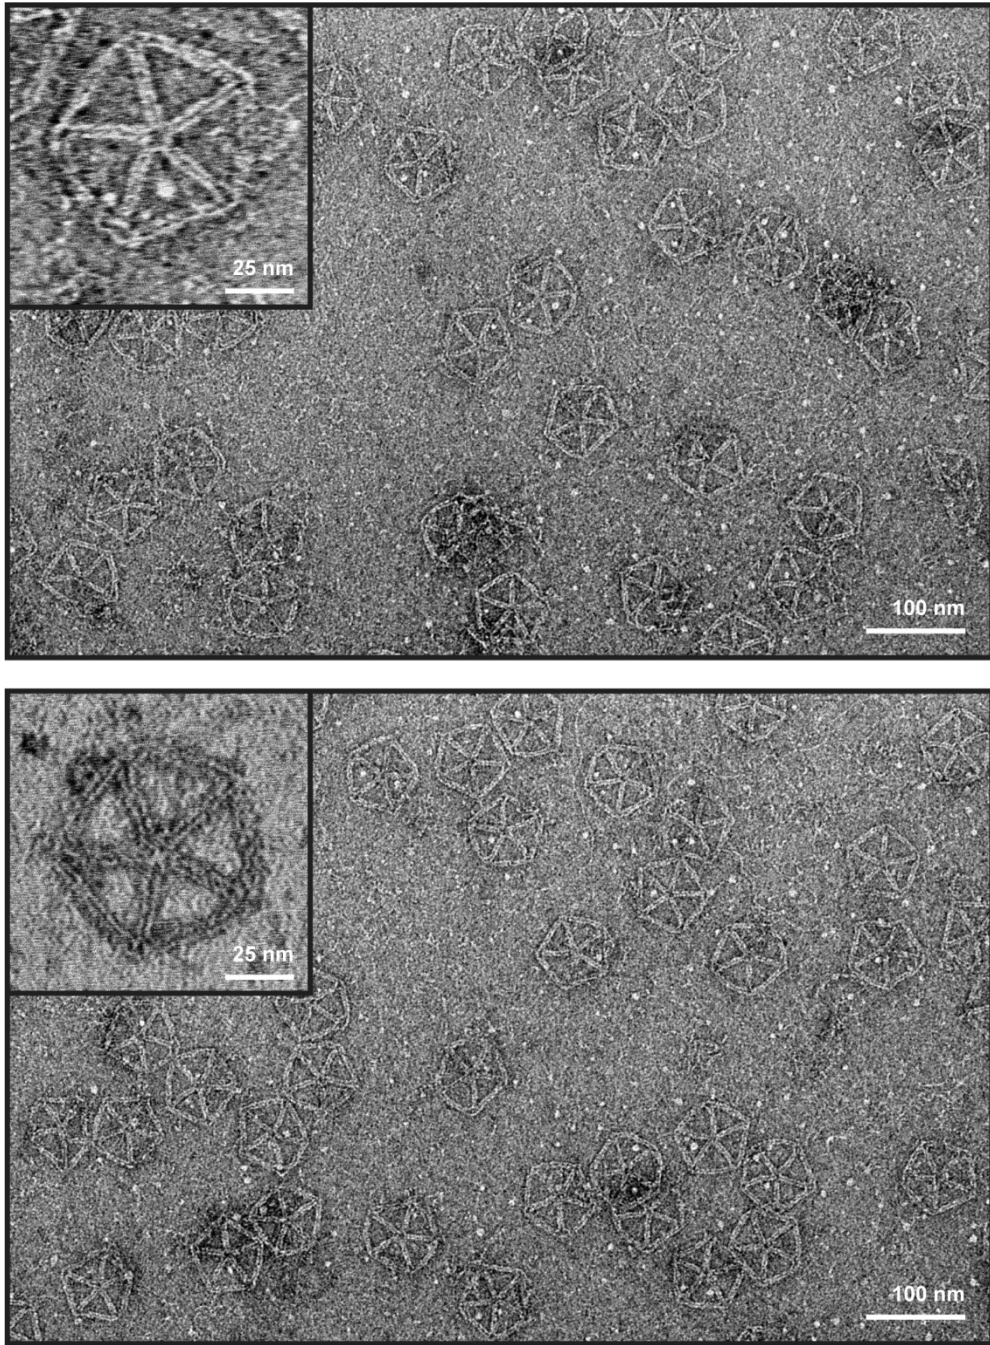

**Supplementary Figure 10** TEM imaging of 6HB-based pentagonal DNA origami object of 84-bp edge-length.

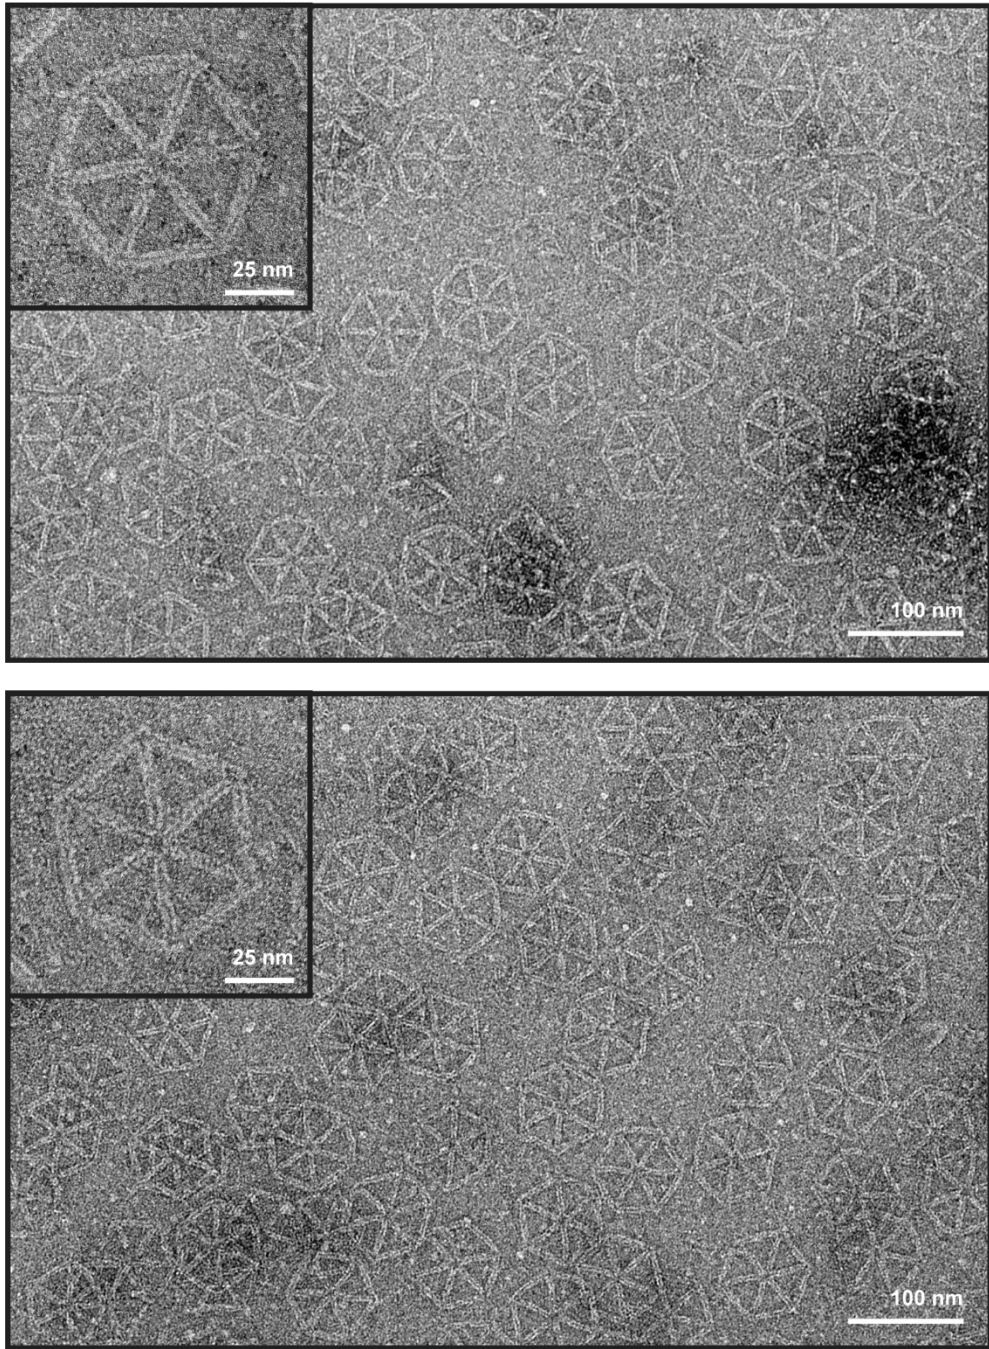

**Supplementary Figure 11** TEM imaging of 6HB-based hexagonal DNA origami object of 84-bp edge-length.

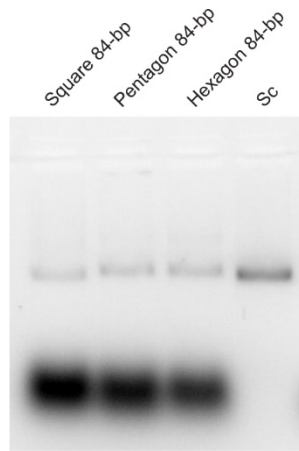

**Supplementary Figure 12** Agarose gel electrophoresis for 6HB-based square, pentagonal, and hexagonal DNA origami objects.

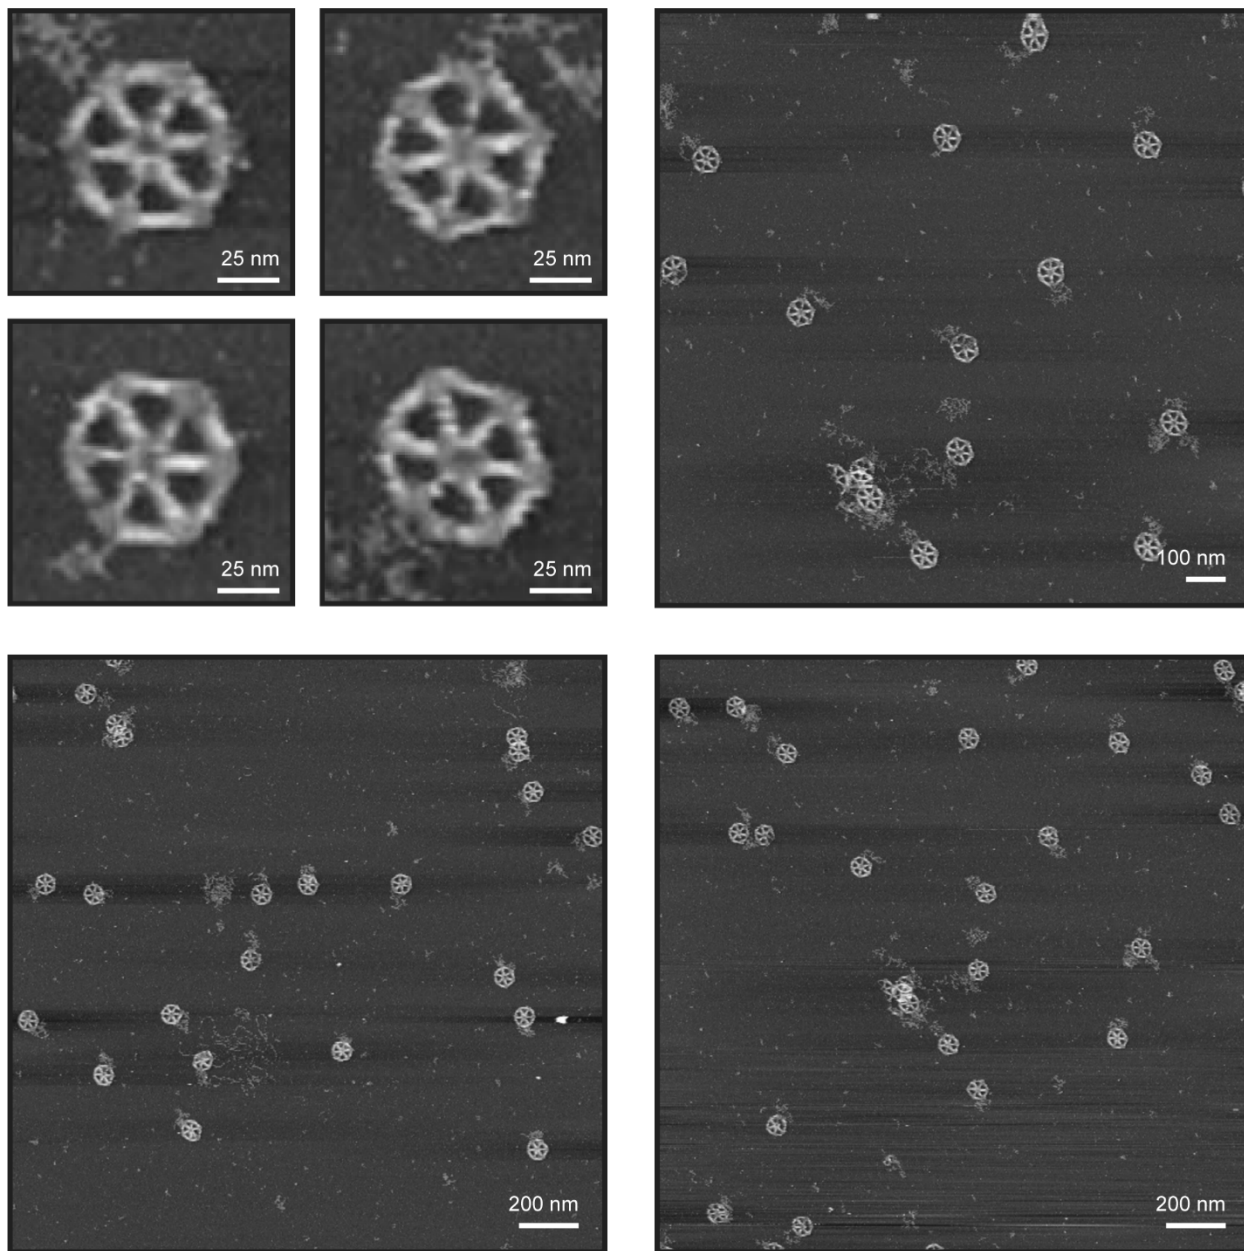

**Supplementary Figure 13** AFM imaging of 6HB-based hexagonal DNA origami of 63-bp edge-length.

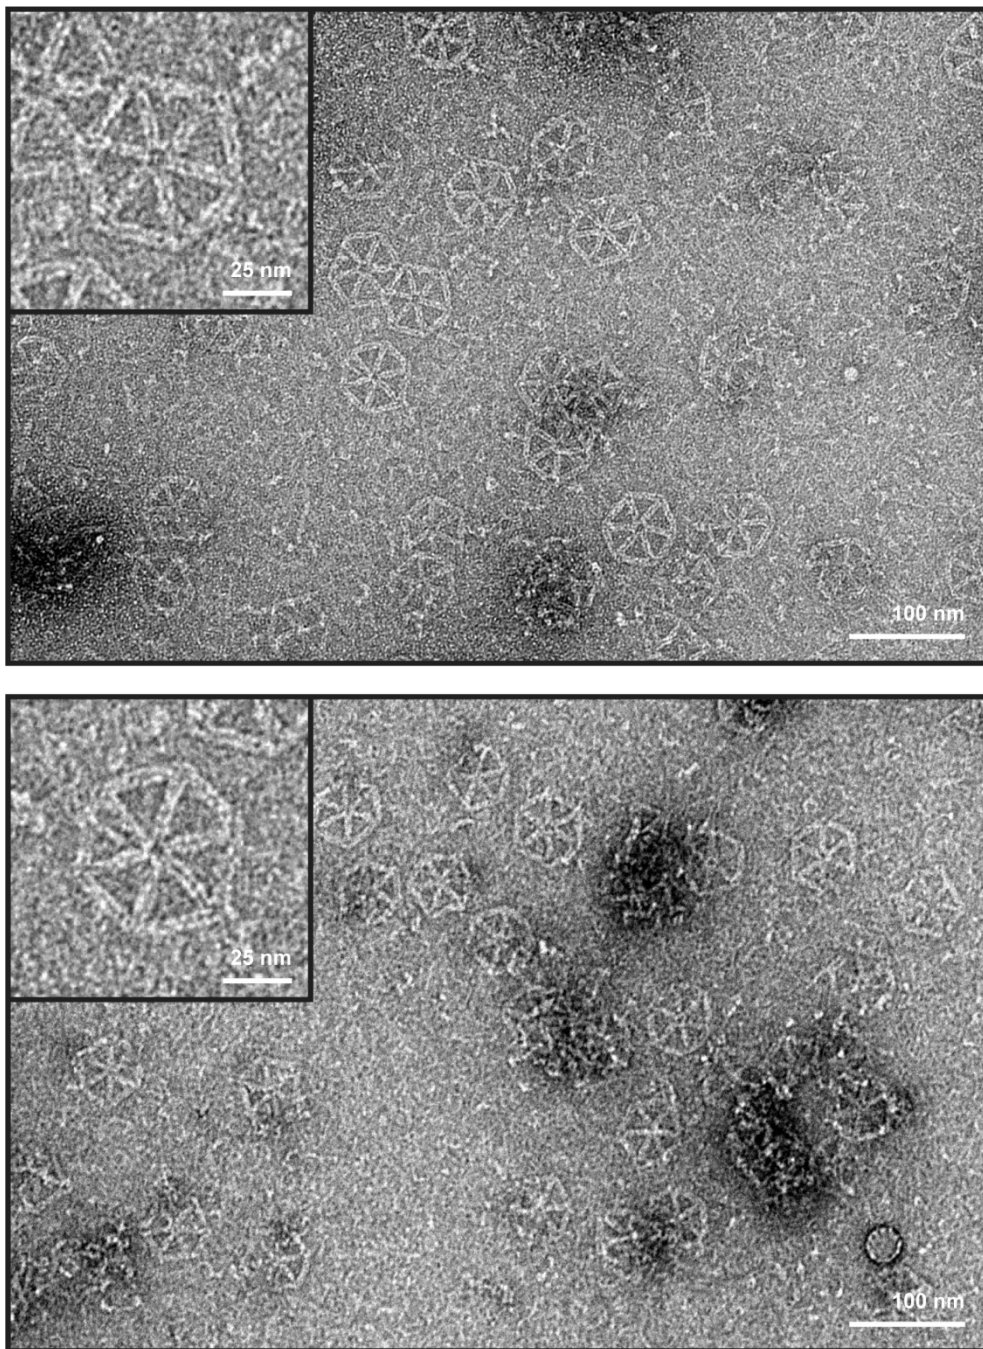

**Supplementary Figure 14** TEM imaging the 6HB-based hexagonal DNA origami of 63-bp edge-length.

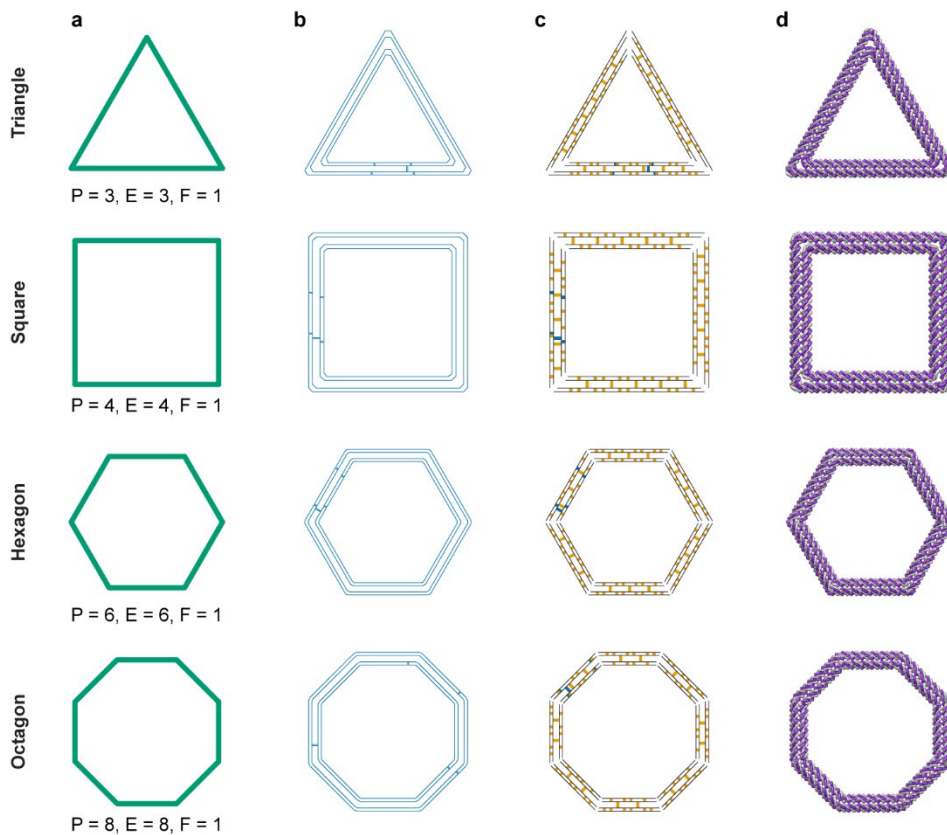

**Supplementary Figure 15** Target geometries, scaffold routing paths, crossover models, and atomic models for the triangle, square, hexagon, and octagon without internal mesh. **a** The target geometries. The letters, P, E, and F denote the number of points, edges, and faces, respectively. **b** Scaffold routing path. The continuous blue loop is the single-stranded DNA scaffold that routes throughout the entire origami object of arbitrary shape. **c** Scaffold double crossovers (blue) determined by the spanning tree algorithm and staple double crossovers (orange). **d** Atomic model.



**Supplementary Table 2** Design parameters for the triangle, square, hexagon, and octagon without internal mesh. # indicates the type of scaffolds in **Supplementary Table 4**.

| Edge type  | Target geometry | Edge length | Scaffold        |                        |                           | Staples      |                        |                           |
|------------|-----------------|-------------|-----------------|------------------------|---------------------------|--------------|------------------------|---------------------------|
|            |                 |             | Required length | # of double crossovers | # of unpaired nucleotides | # of staples | # of double crossovers | # of unpaired nucleotides |
| <b>DX</b>  | Triangle        | 128-bp      | 855-nt (#2)     | 1                      | 24                        | 18           | 17                     | 30                        |
|            | Hexagon         | 74-bp       | 954-nt (#2)     | 1                      | 24                        | 18           | 17                     | 42                        |
| <b>6HB</b> | Triangle        | 128-bp      | 2,772-nt (#2)   | 5                      | 69                        | 64           | 106                    | 87                        |
|            | Square          | 105-bp      | 2,908-nt (#1)   | 5                      | 96                        | 68           | 115                    | 100                       |
|            | Hexagon         | 74-bp       | 3,042-nt (#1)   | 5                      | 120                       | 69           | 115                    | 66                        |
|            | Octagon         | 57-bp       | 3,072-nt (#1)   | 5                      | 136                       | 69           | 109                    | 120                       |

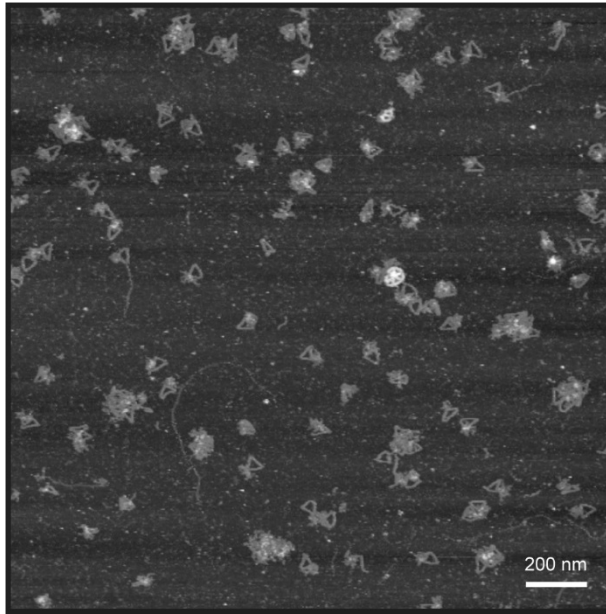

**Supplementary Figure 16** AFM imaging of DX-based triangular DNA origami of 128-bp edge-length without internal mesh.

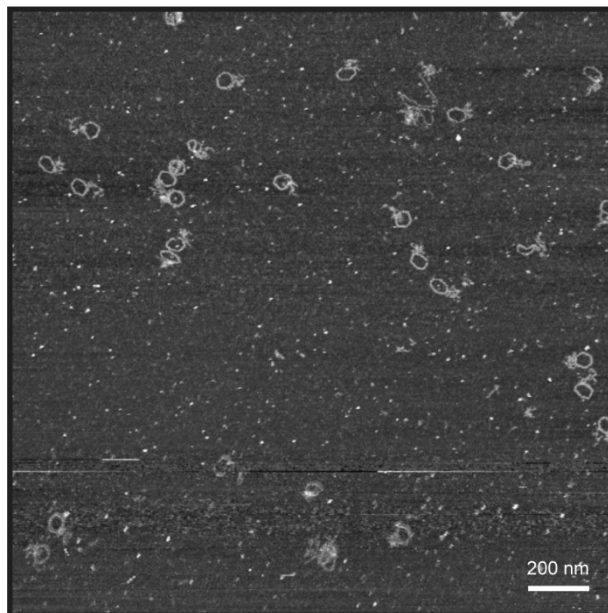

**Supplementary Figure 17** AFM imaging of DX-based hexagonal DNA origami of 74-bp edge-length without internal mesh.

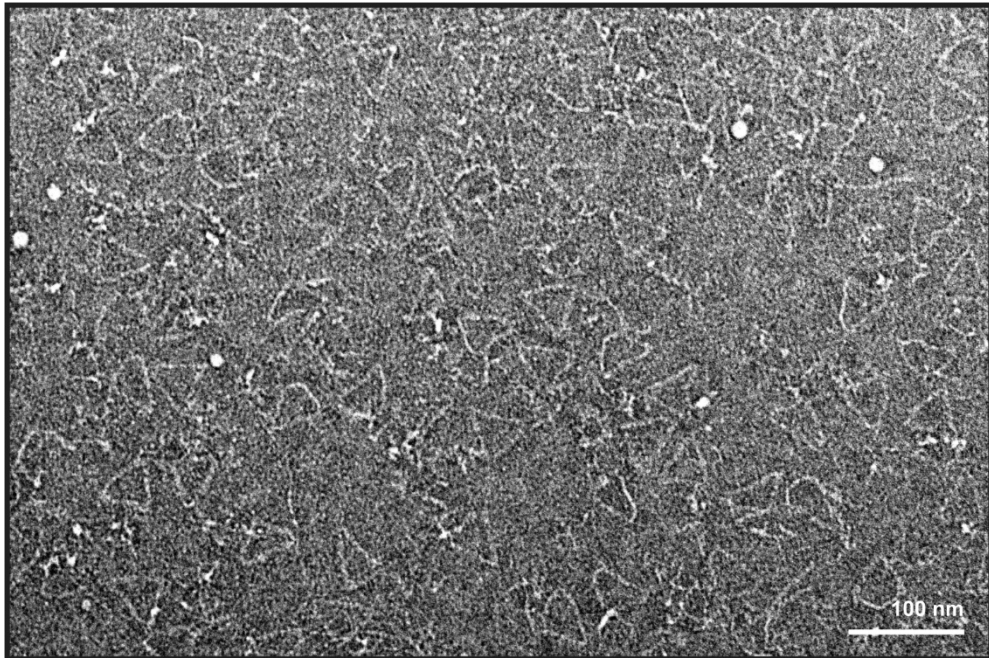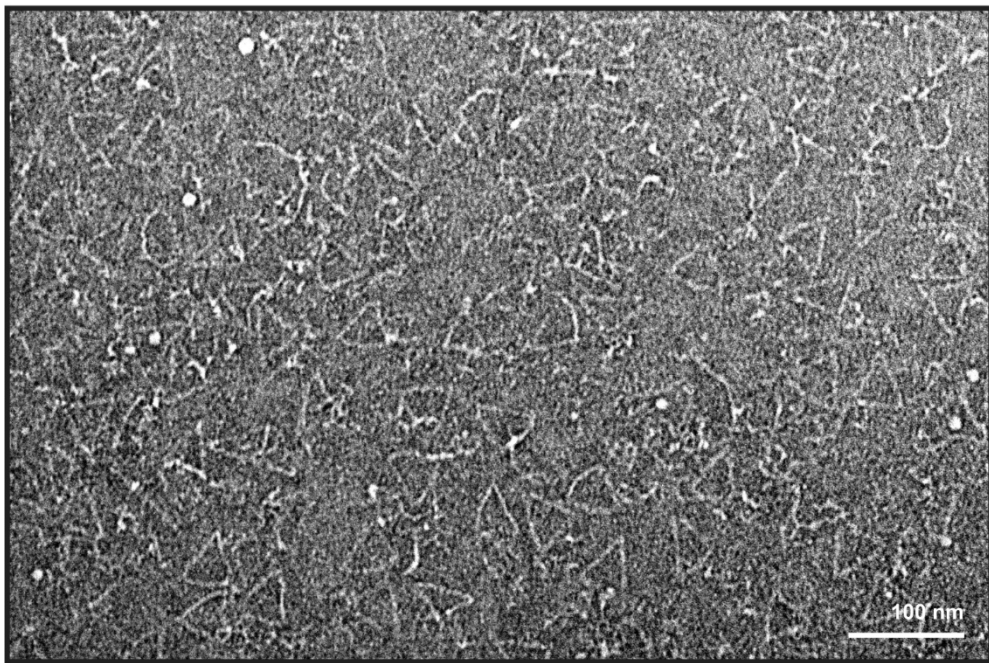

**Supplementary Figure 18** TEM imaging of DX-based triangular DNA origami of 128-bp edge-length without internal mesh.

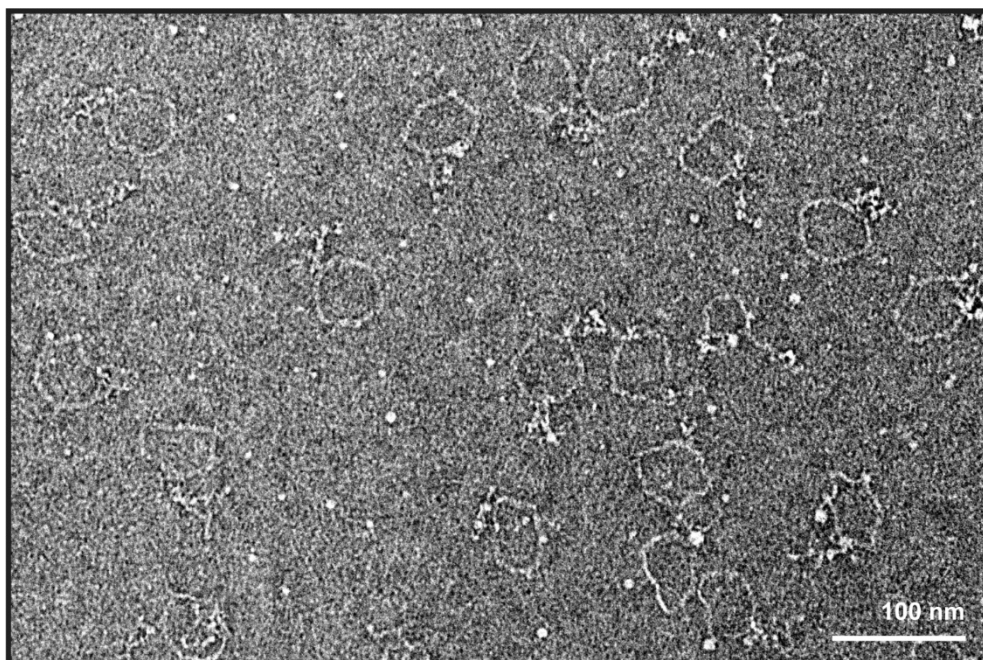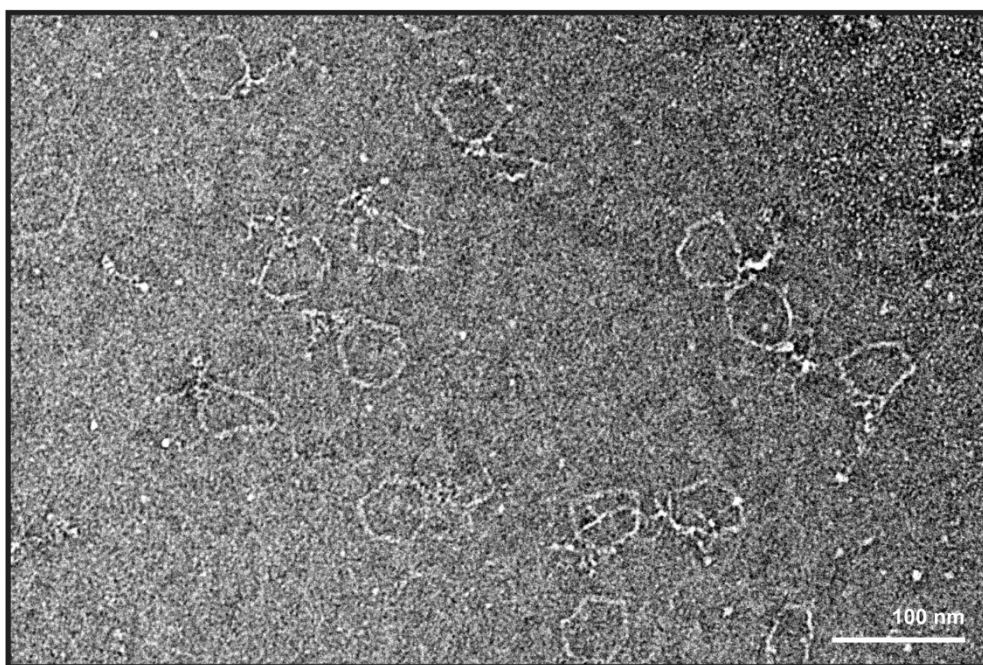

**Supplementary Figure 19** TEM imaging of DX-based hexagonal DNA origami of 74-bp edge-length without internal mesh.

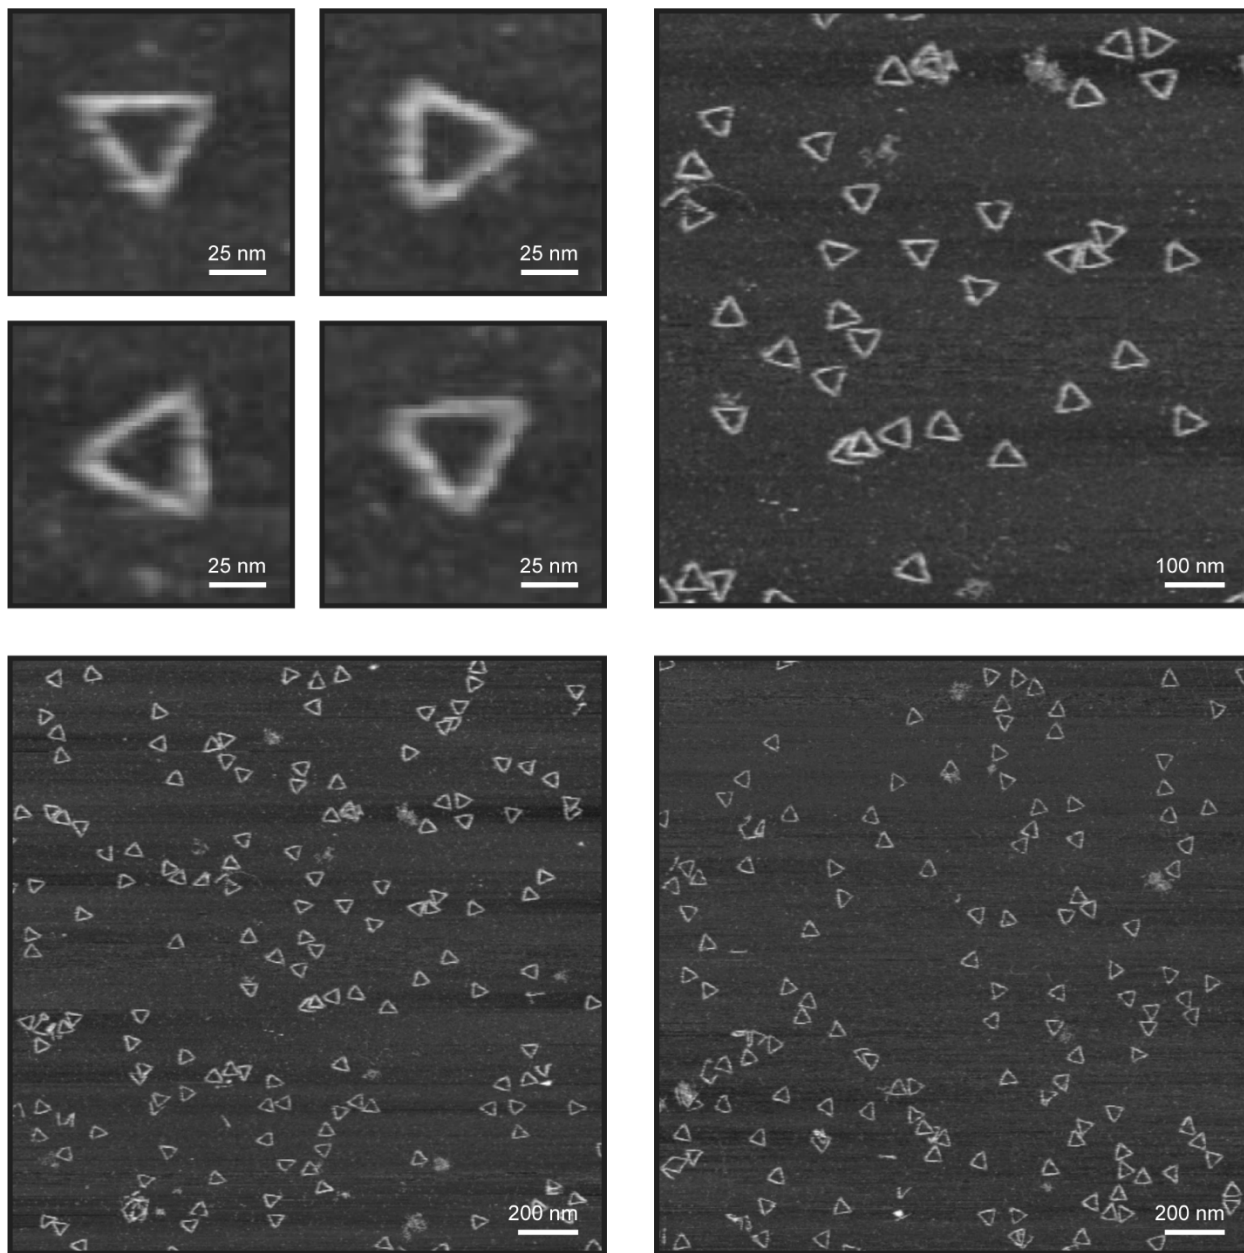

**Supplementary Figure 20** AFM imaging of 6HB-based triangular DNA origami of 128-bp edge-length without internal mesh.

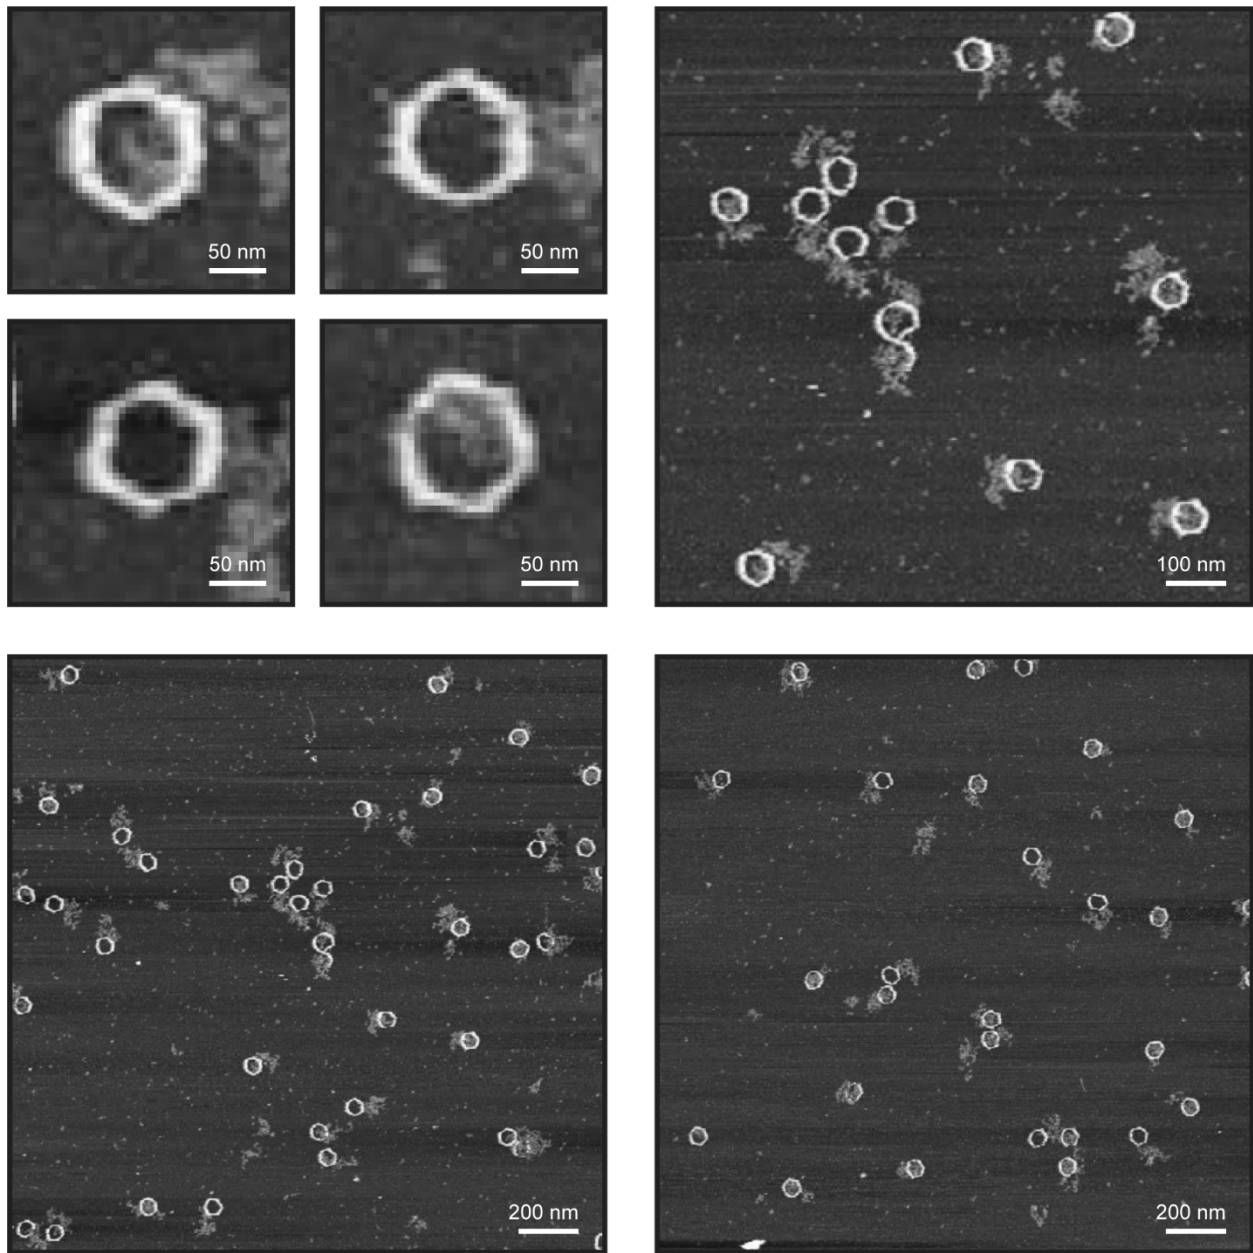

**Supplementary Figure 21** AFM imaging of 6HB-based hexagonal DNA origami of 74-bp edge-length without internal mesh.

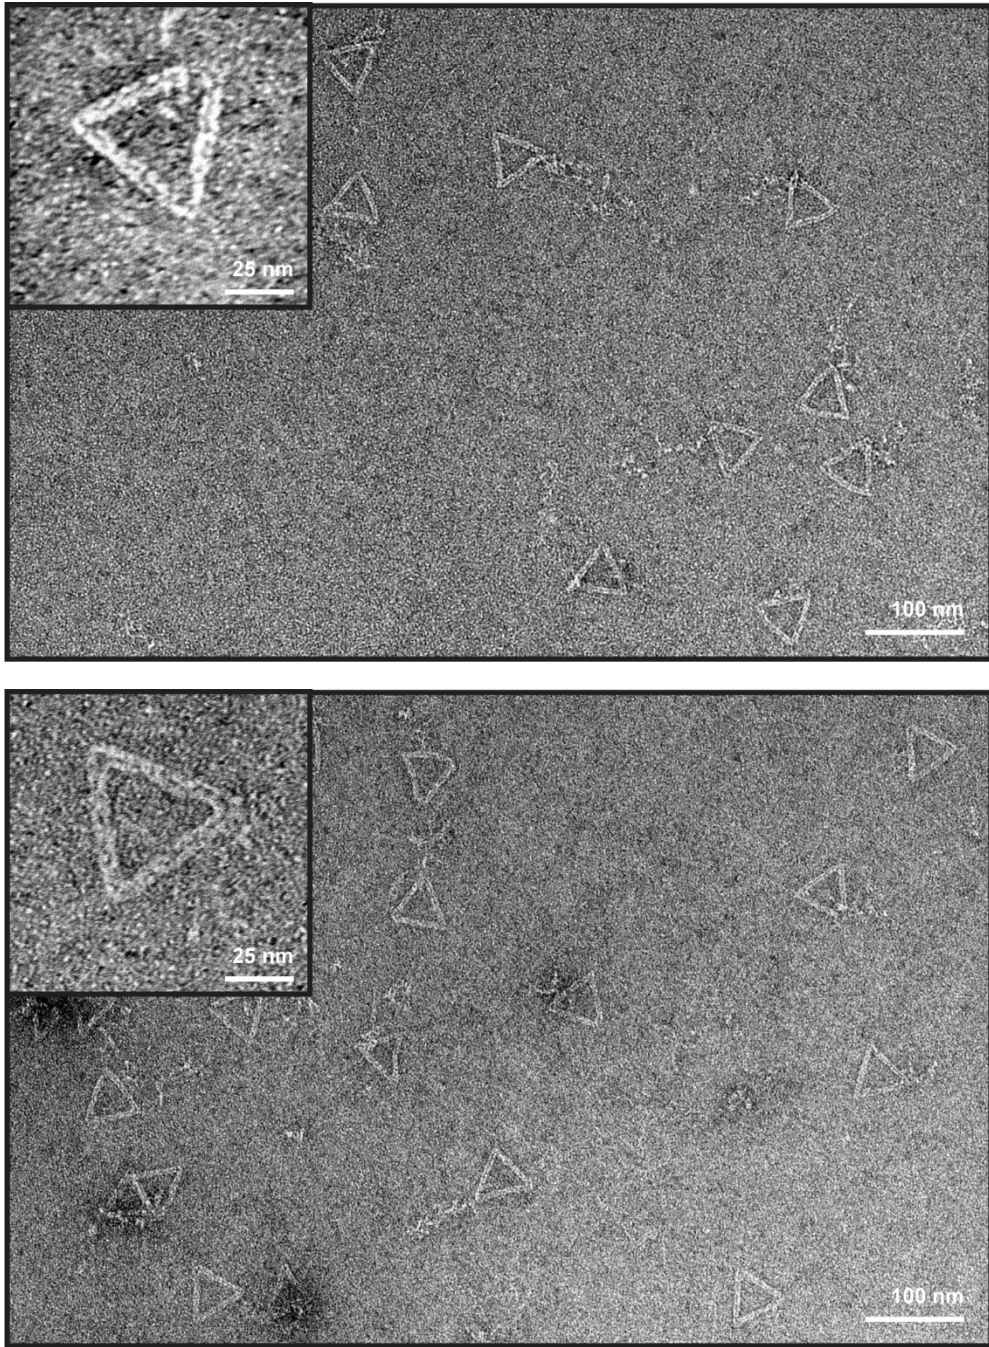

**Supplementary Figure 22** TEM imaging of 6HB-based triangular DNA origami of 128-bp edge-length without internal mesh.

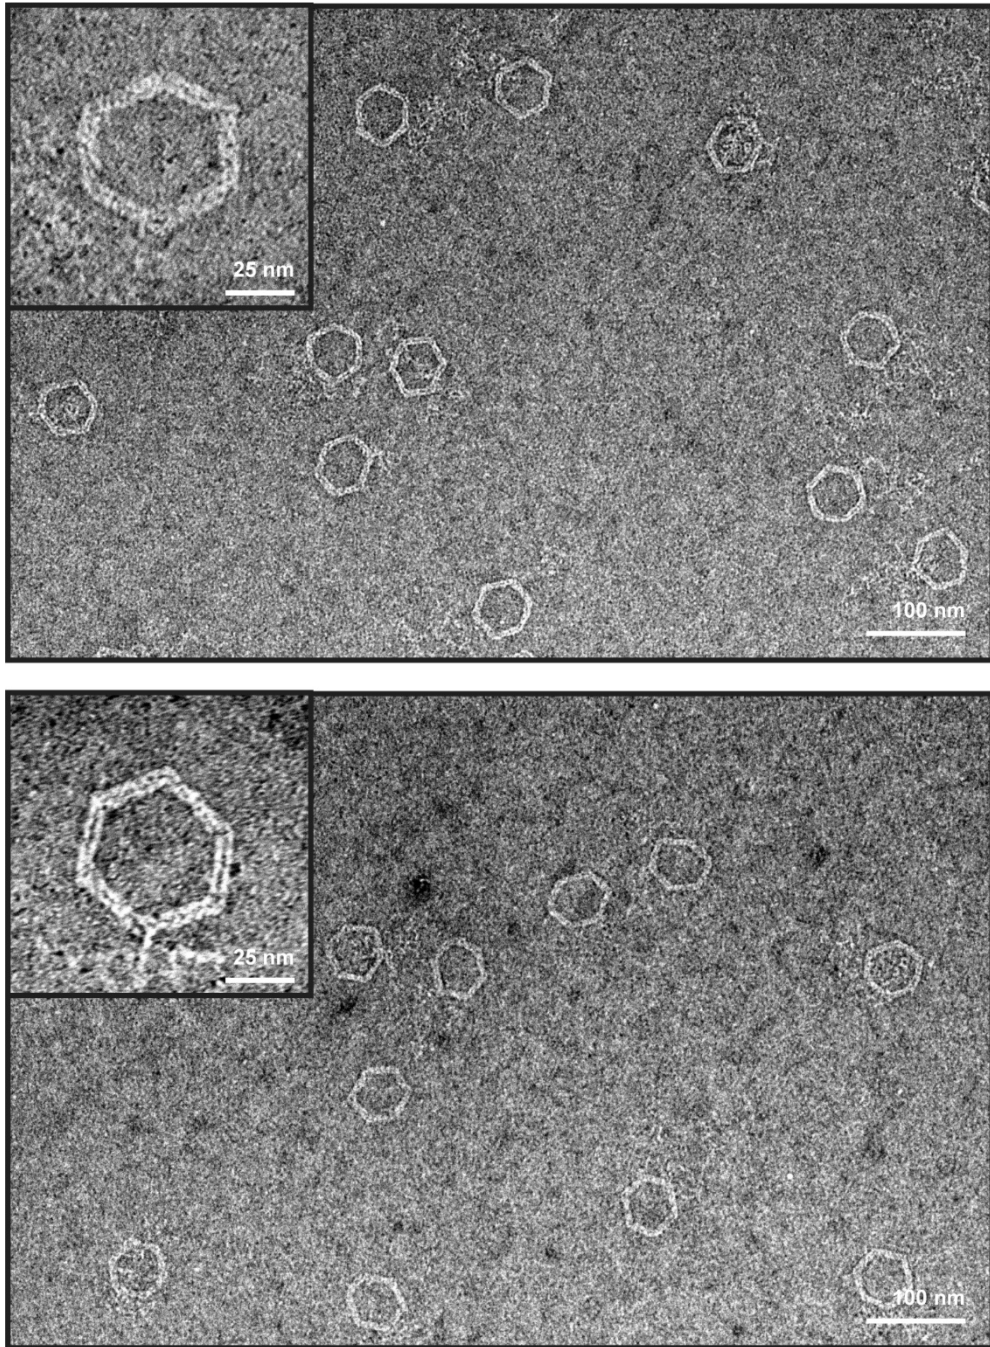

**Supplementary Figure 23** TEM imaging of 6HB-based hexagonal DNA origami of 74-bp edge-length without internal mesh.



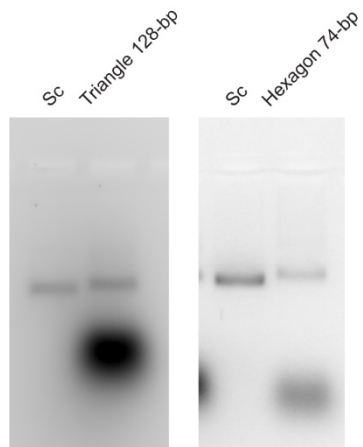

**Supplementary Figure 24** Agarose gel electrophoresis for 6HB-based triangular and hexagonal DNA origami objects without internal mesh.

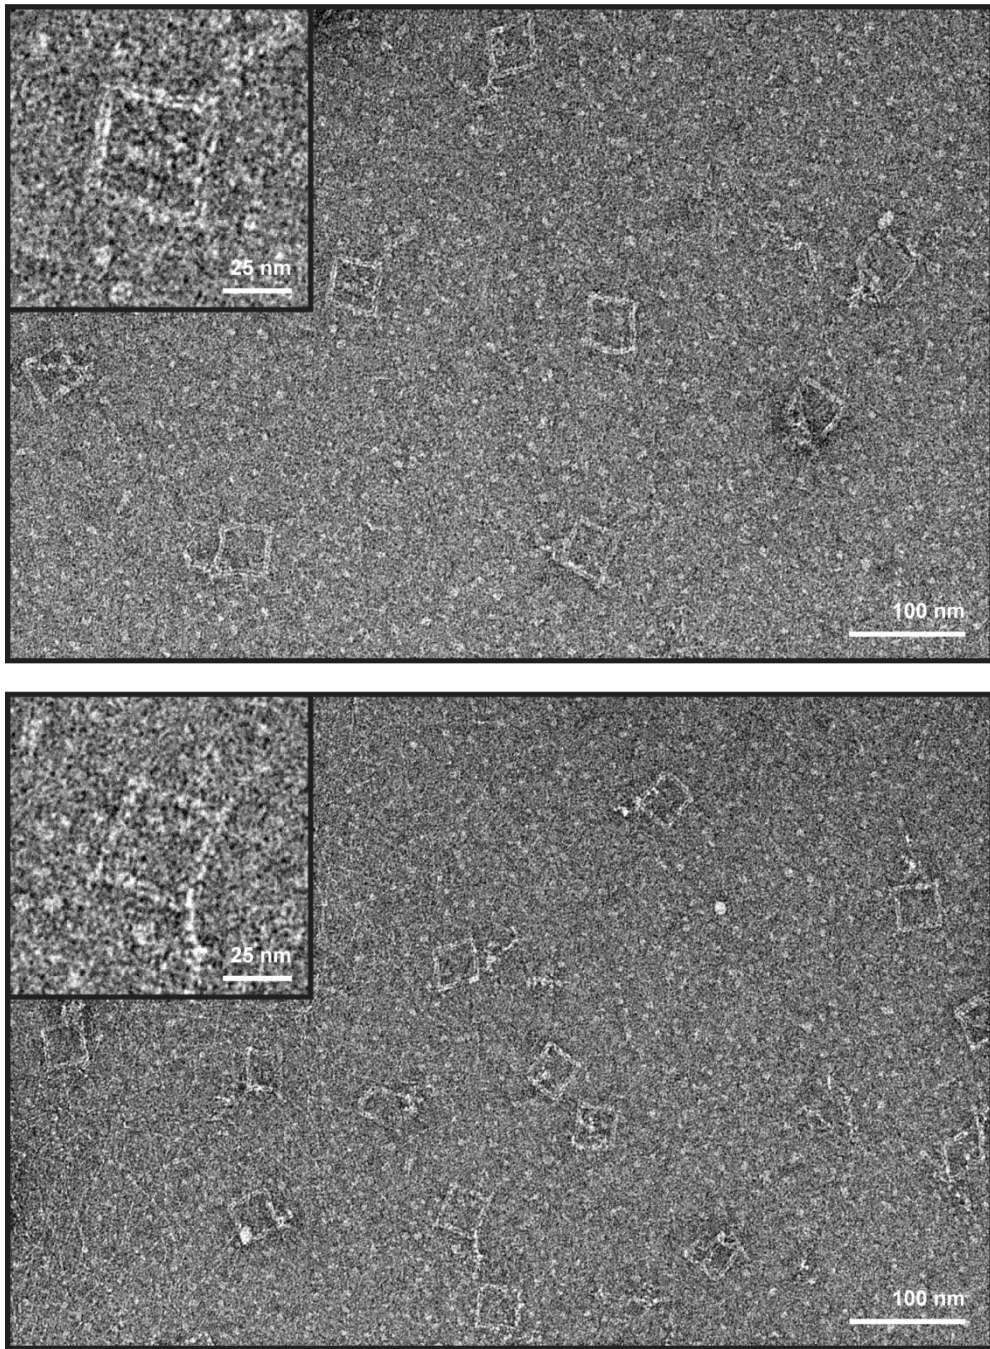

**Supplementary Figure 25** TEM imaging of 6HB-based square DNA origami of 105-bp edge-length without internal mesh.

6HB-based octagonal DNA origami

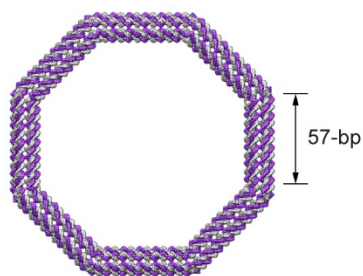

Atomic model

Design Type 1

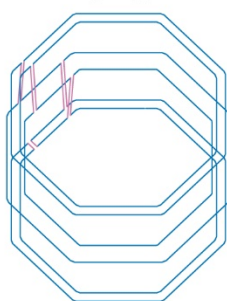

Scaffold routing

Design Type 2

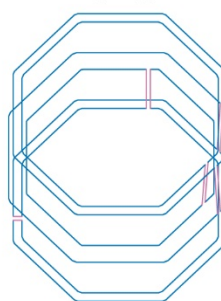

Scaffold routing

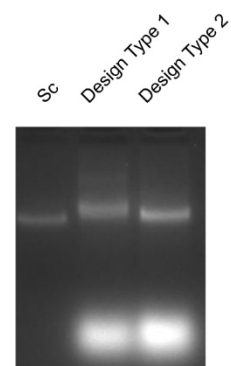

Design Type 1

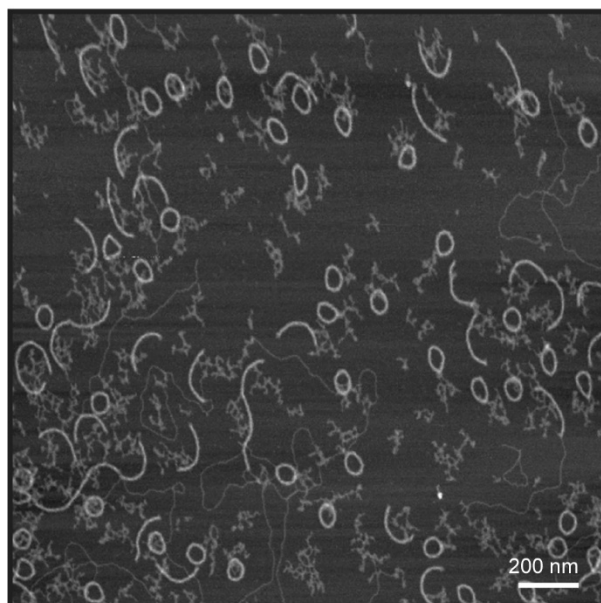

Design Type 2

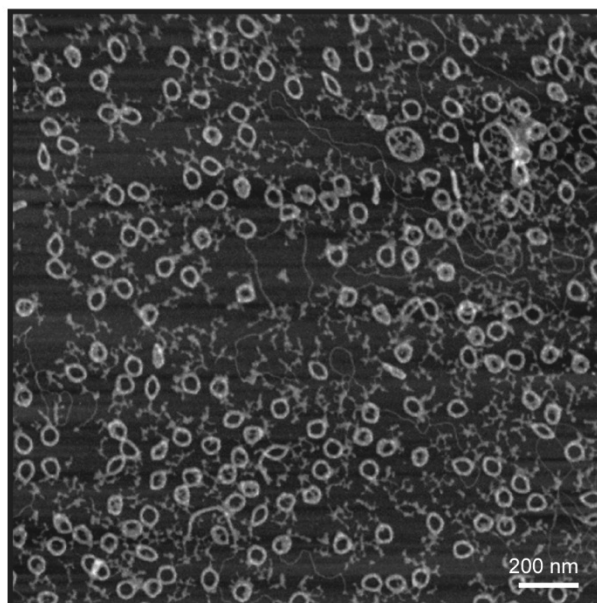

**Supplementary Figure 26** Two designs, agarose gel electrophoresis, and AFM imaging of 6HB-based octagonal DNA origami of 57-bp edge-length without internal mesh. All scaffold double-crossovers are located on the same edge in Design Type 1 versus distributed to different edges in Design Type 2.

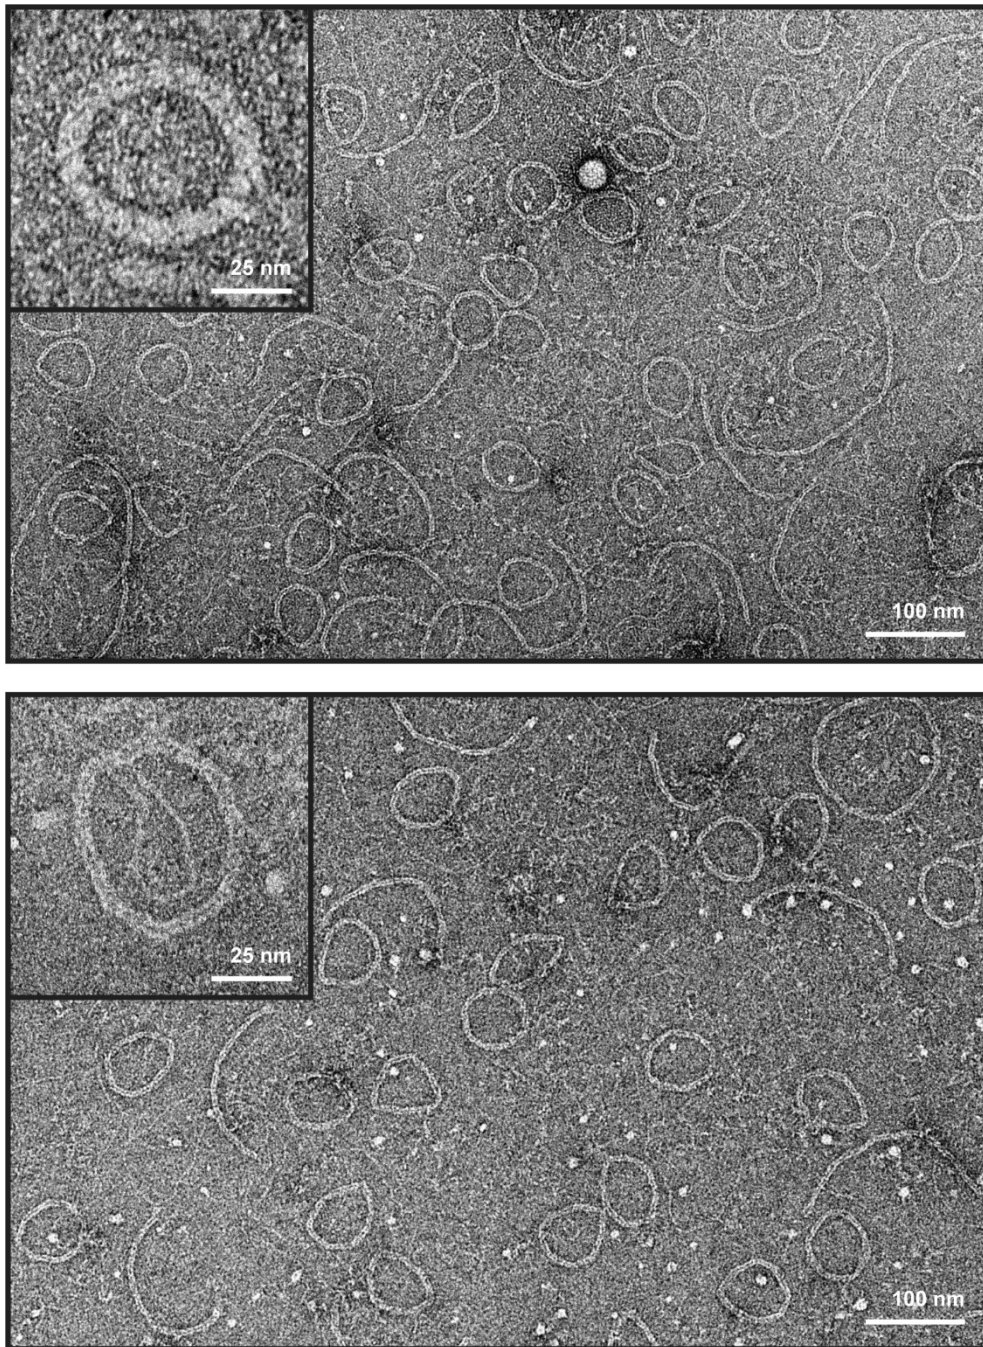

**Supplementary Figure 27** TEM imaging of 6HB-based octagonal DNA origami of 57-bp edge-length without internal mesh when using the Design Type 1 shown in **Supplementary Fig. 26**.

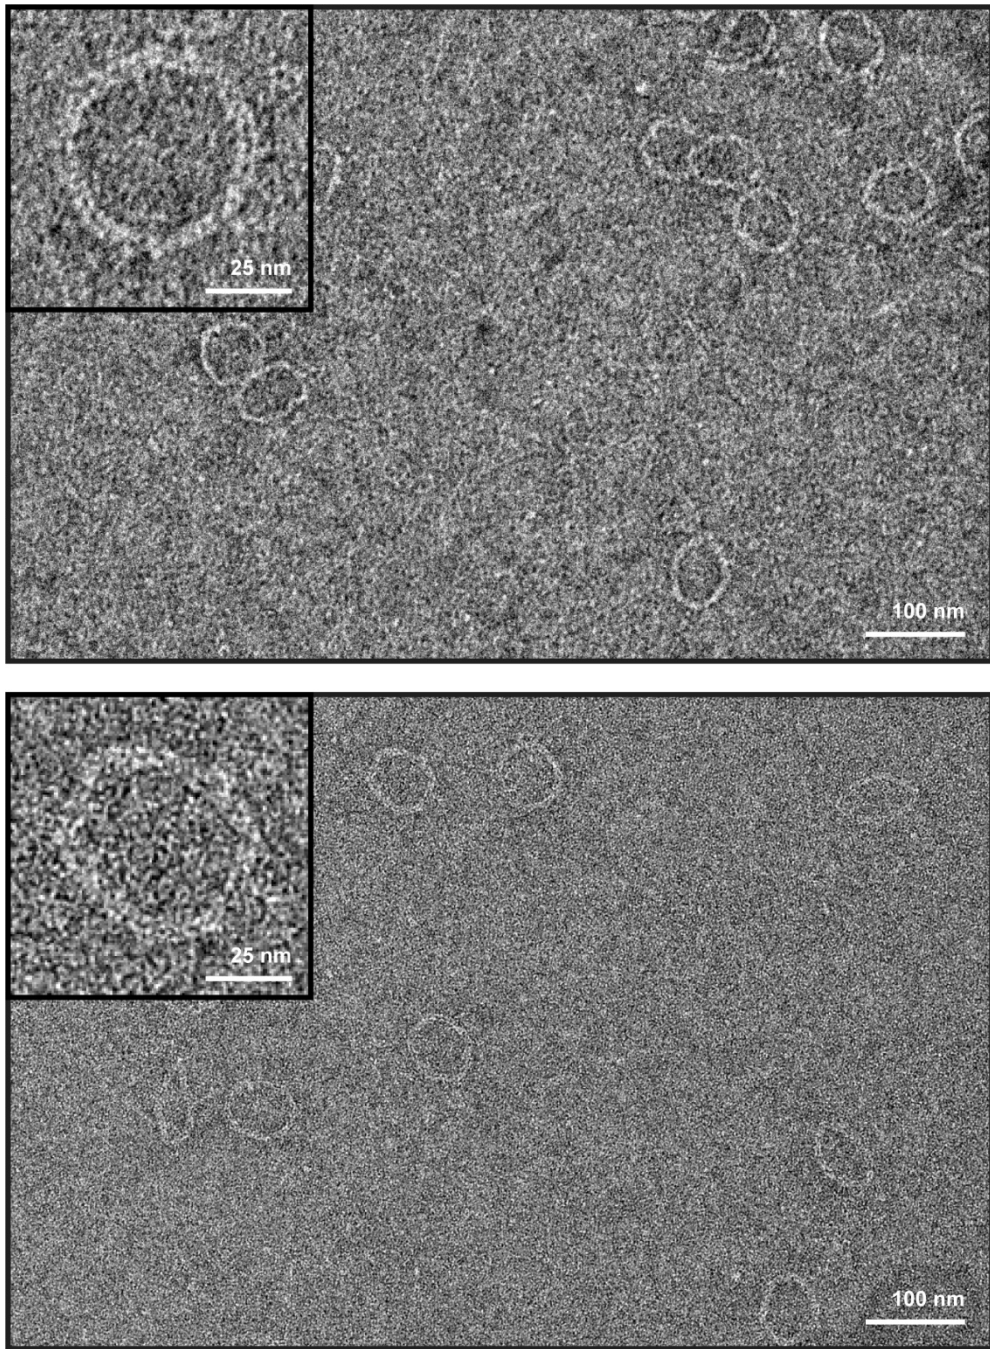

**Supplementary Figure 28** TEM imaging of 6HB-based octagonal DNA origami of 57-bp edge-length without internal mesh when using Design Type 2 shown in **Supplementary Fig. 26**.

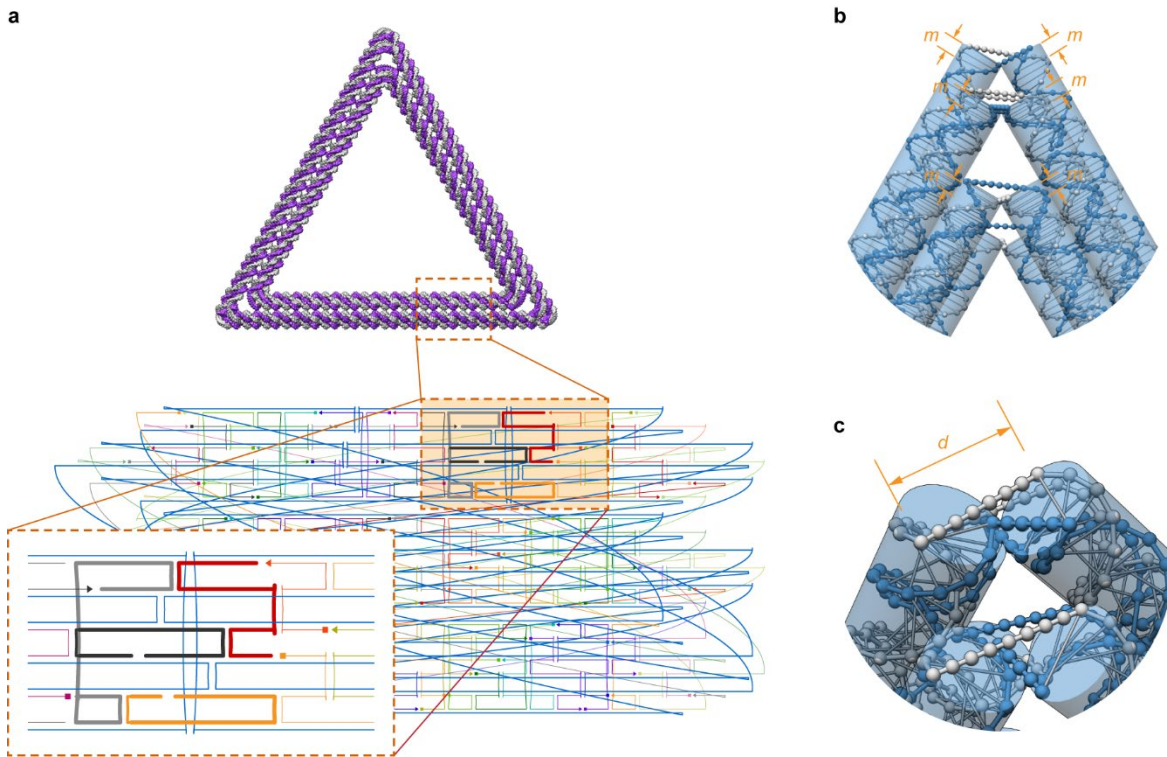

**Supplementary Figure 29** 6HB-based open triangular DNA origami. **a** Four staples (gray, red, black and orange thick lines in the caDNAo map) on one edge of the triangle where three scaffold double-crossovers exists were removed. The stability of programmed internal vertex angles was evaluated by **b** reducing the mitered edge length ( $m$ ) by 2-bp and **c** changing the parameter to determine axial rise per nucleotide in both the scaffold and staple loop (the axial rise is calculated by dividing the distance ( $d$ ) by the design parameter).

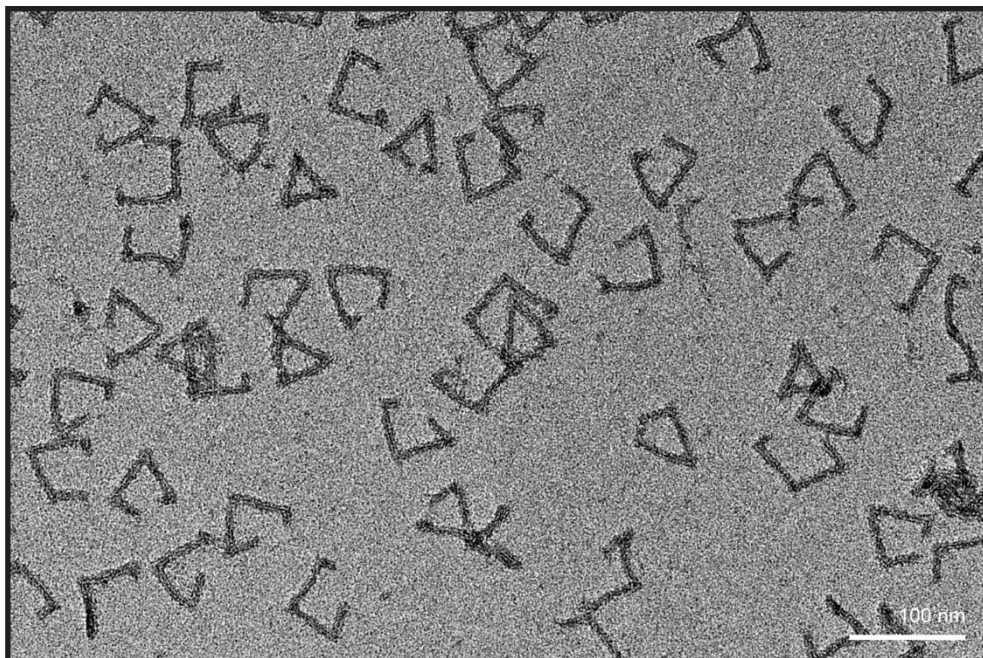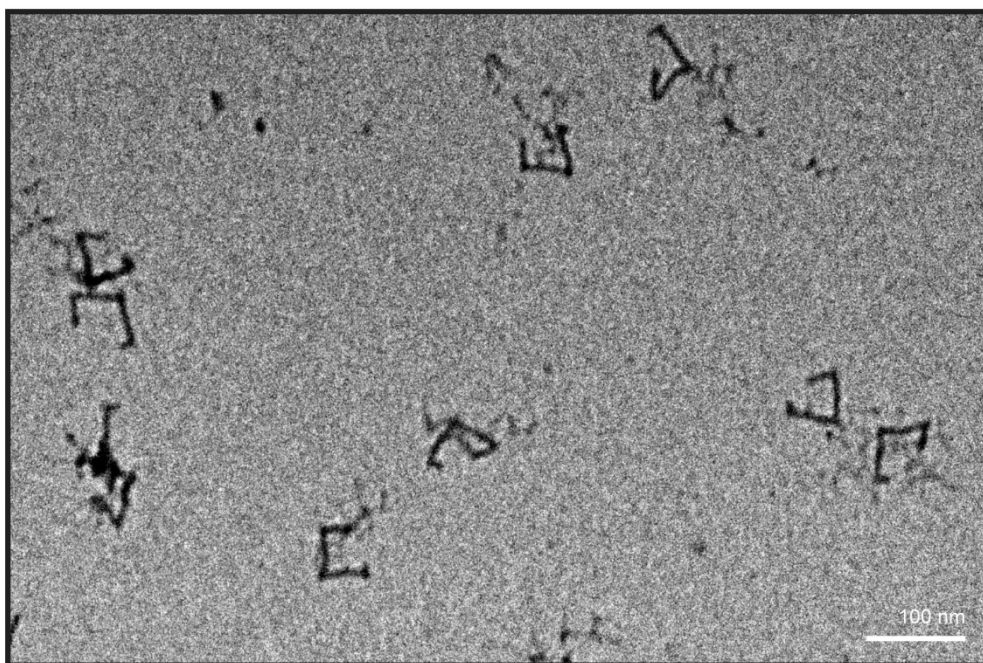

**Supplementary Figure 30** TEM imaging of the DNA open triangular object (Top) and with reducing the mitered edge length  $m$  (**Supplementary Fig. 26b**) as 2-bp (Bottom).

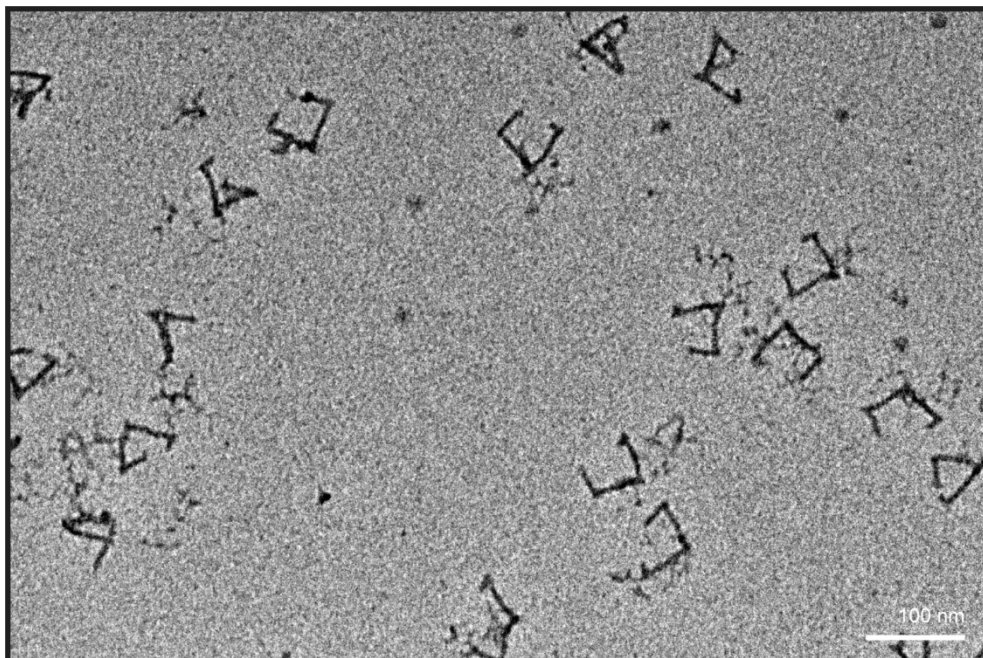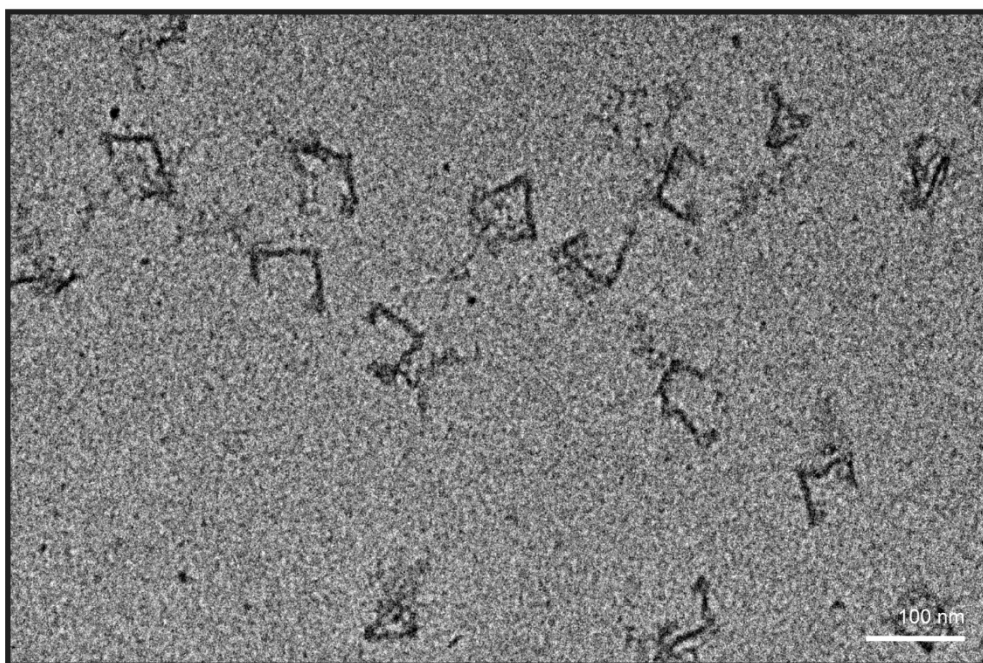

**Supplementary Figure 31** TEM imaging of DNA open triangles with the different number of unpaired nucleotides crossing the vertex. The number of unpaired nucleotides is calculated by dividing the distance  $d$  (**Supplementary Fig. 26c**) with the parameter 0.34 (top) and 0.55 (bottom).



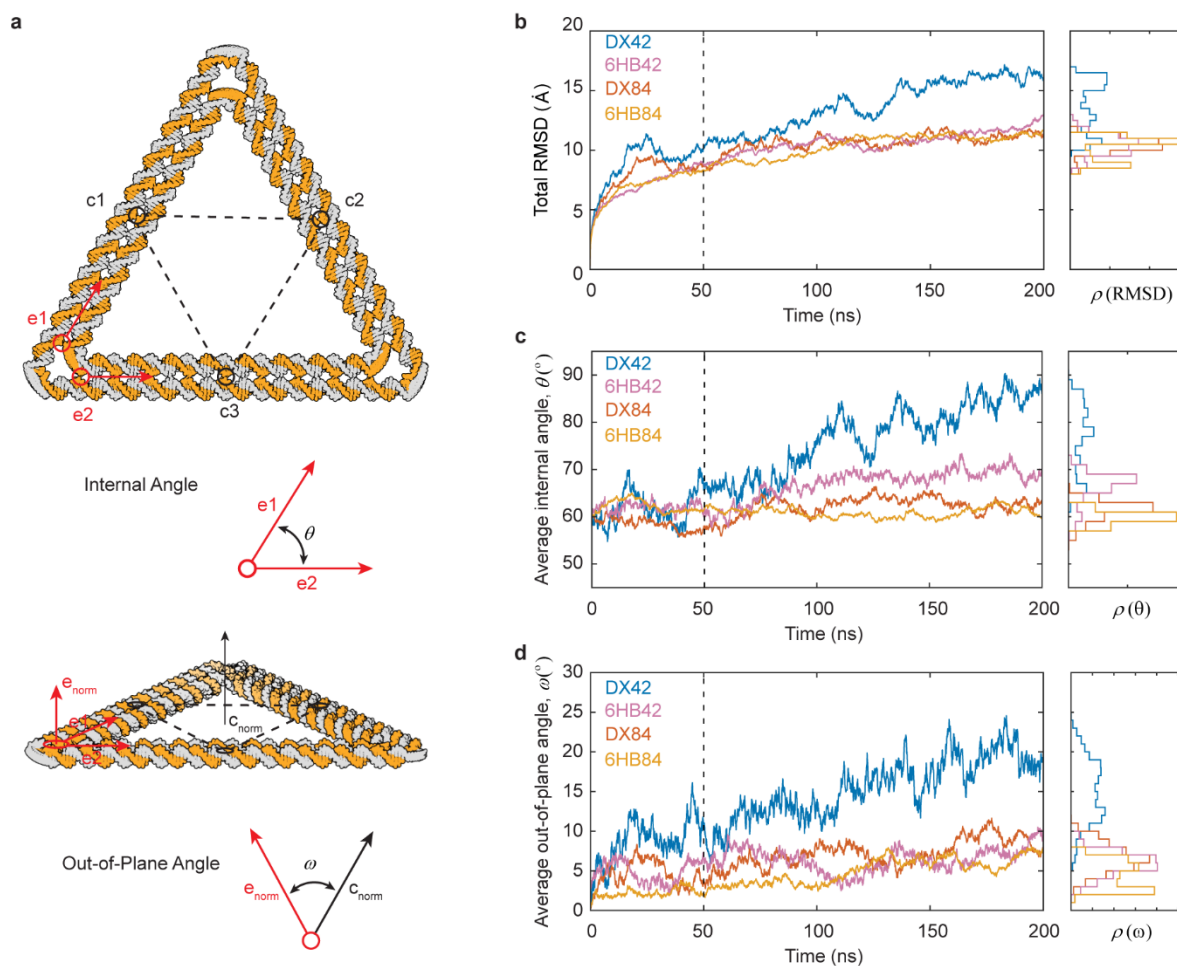

**Supplementary Figure 32** Molecular dynamics trajectory data. **a** Schematic illustrating the calculation of the (top) internal angles,  $\theta$ , and (bottom) out-of-plane angles,  $\omega$ , of a wireframe DNA origami object. **b** The total RMSD of each triangular wireframe object over 200 ns MD simulation (left), and a histogram of the total RMSD values after  $t = 50$  ns equilibration time. **c** The average internal angle,  $\theta$ , of each triangular wireframe object over 200 ns MD simulation time (left), and a histogram of the internal angles after  $t = 50$  ns equilibration time. **d** The average out-of-plane angle,  $\omega$ , of each triangular wireframe object over 200 ns MD simulation time (left), and a histogram of the internal angles after  $t = 50$  ns equilibration time.

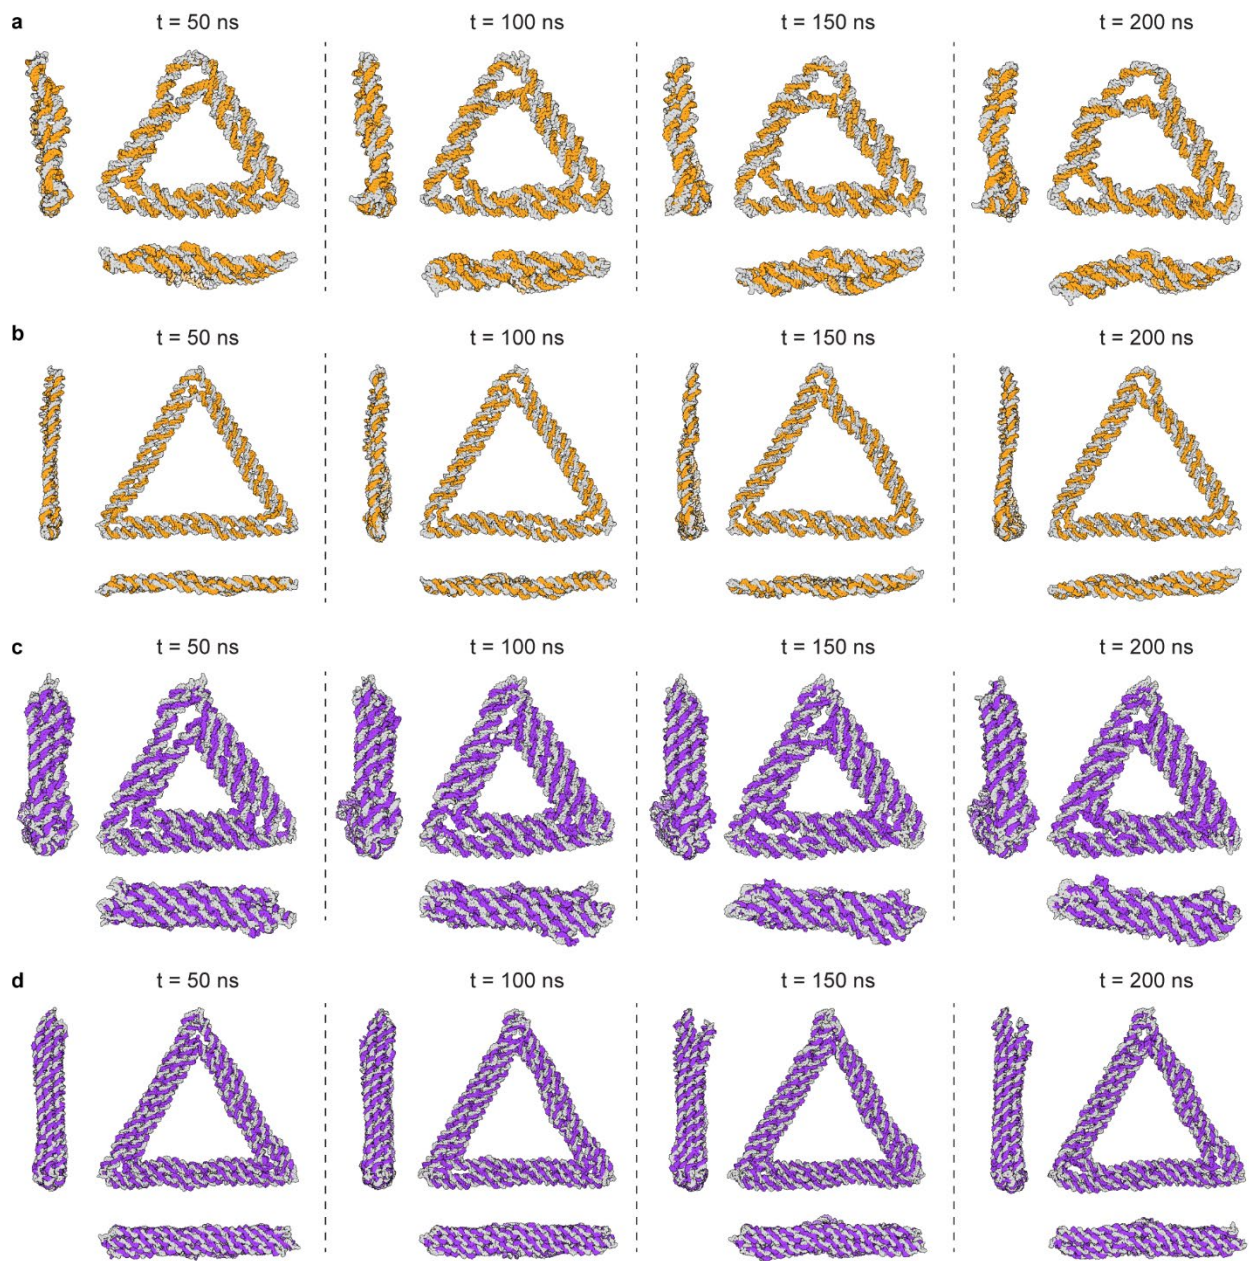

**Supplementary Figure 33** Instantaneous configurations of the triangular origami objects from MD simulations. **a** DX-based DNA triangular origami with 42-bp edge-length **b** DX-based DNA triangular origami with 84-bp edge-length **c** 6HB-based DNA triangular origami with 42-bp edge-length **d** 6HB-based DNA triangular origami with 84-bp edge-length.

**Supplementary Table 3** Design parameters for the 6HB-based star and curved beam DNA origami objects. # indicates the type of scaffolds in **Supplementary Table 4**.

| Target geometry            | Edge length | Scaffold        |                        |                           | Staples      |                        |                           |
|----------------------------|-------------|-----------------|------------------------|---------------------------|--------------|------------------------|---------------------------|
|                            |             | Required length | # of double crossovers | # of unpaired nucleotides | # of staples | # of double crossovers | # of unpaired nucleotides |
| <b>Star</b>                | 42-bp       | 5,869-nt (#1)   | 20                     | 295                       | 128          | 184                    | 374                       |
| <b>Curved beam</b>         | 42-bp       | 6,869-nt (#1)   | 20                     | 331                       | 154          | 211                    | 392                       |
| <b>Hexagon with a hole</b> | 42-bp       | 12,096-nt       | 59                     | 198                       | 282          | 361                    | 1,128                     |
| <b>Circle</b>              | 42-bp       | 16,029-nt       | 74                     | 863                       | 364          | 427                    | 1,258                     |
| <b>Quarter circle</b>      | 42-bp       | 11,354-nt       | 26                     | 393                       | 264          | 402                    | 496                       |
| <b>Annulus</b>             | 42-bp       | 12,013-nt       | 35                     | 573                       | 265          | 376                    | 767                       |
| <b>A-shape</b>             | 42-bp       | 13,831-nt       | 35                     | 551                       | 311          | 471                    | 605                       |
| <b>G-shape</b>             | 42-bp       | 16,662-nt       | 41                     | 690                       | 375          | 561                    | 791                       |

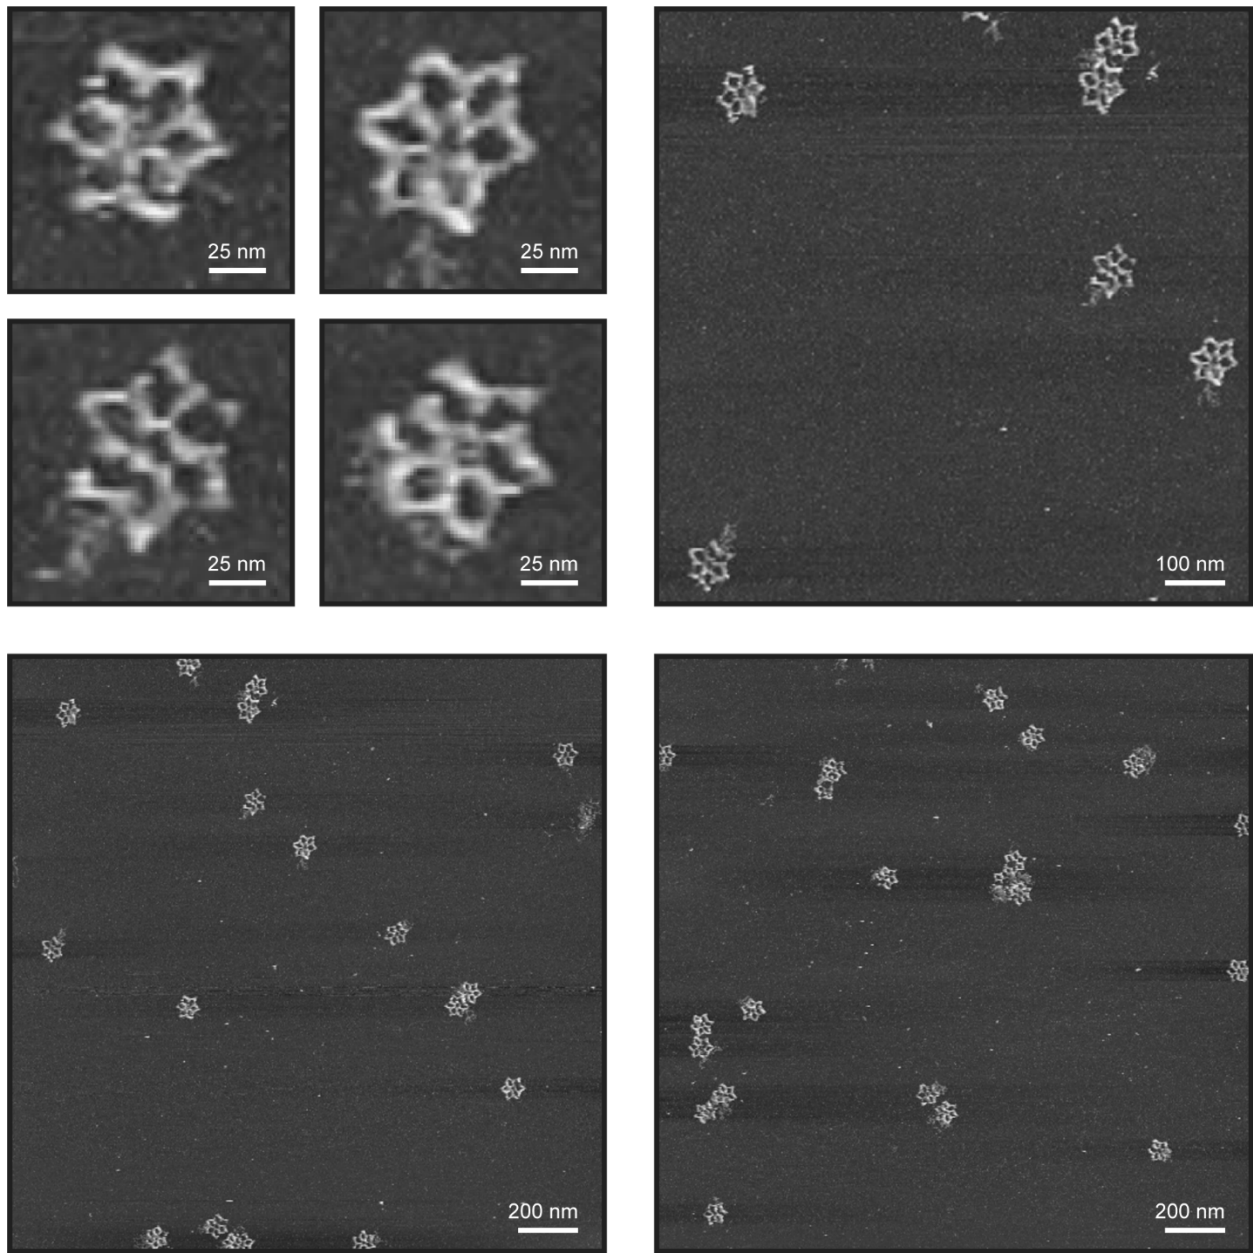

**Supplementary Figure 34** AFM imaging of 6HB-based star DNA origami of 42-bp edge-length.

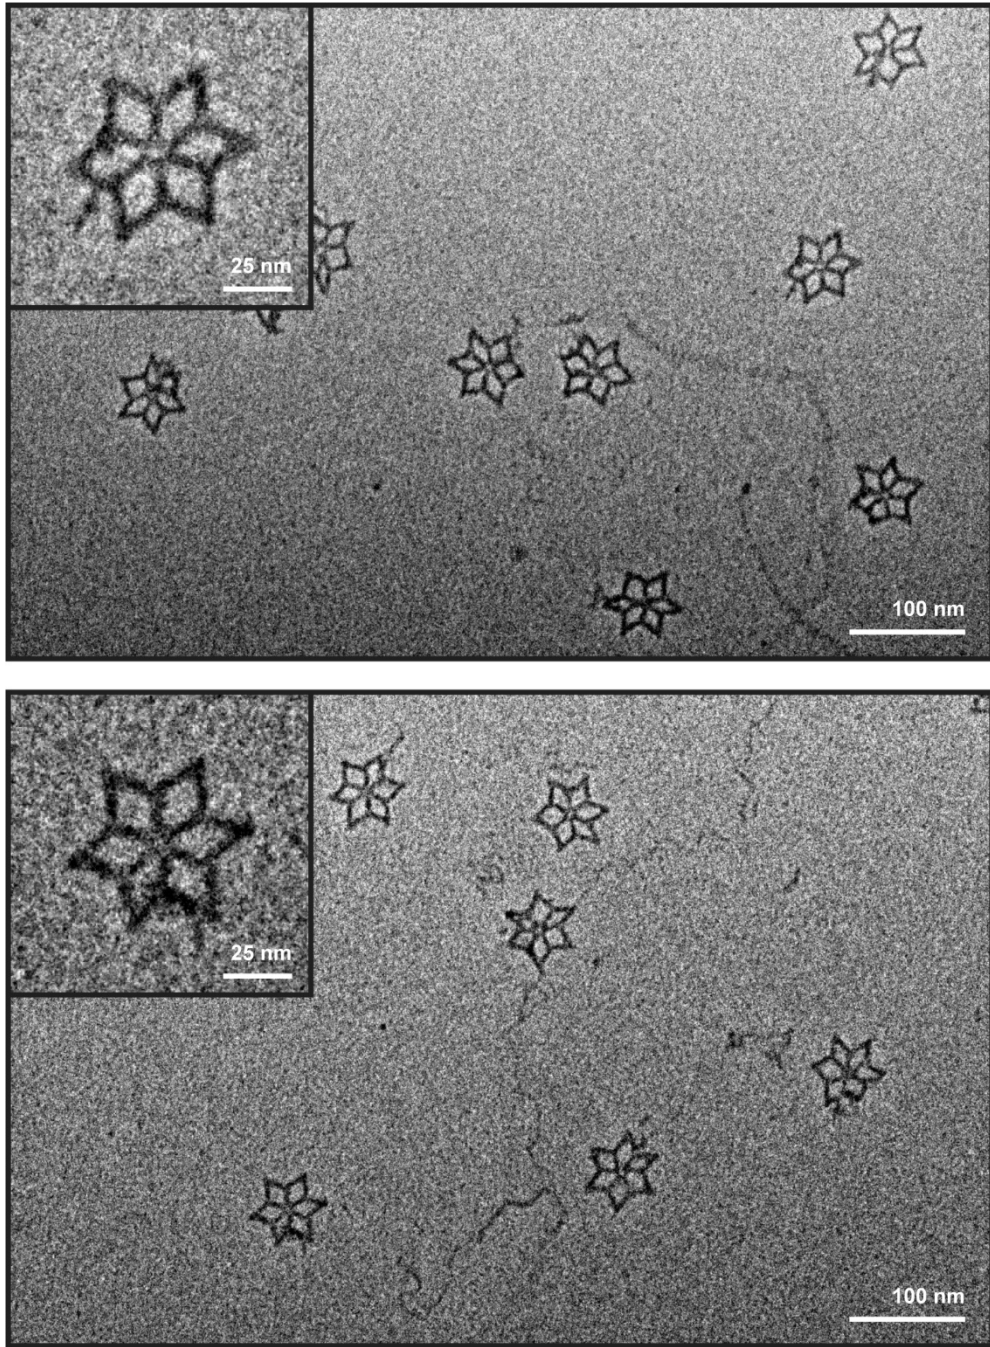

**Supplementary Figure 35** TEM imaging of 6HB-based star DNA origami of 42-bp edge-length.

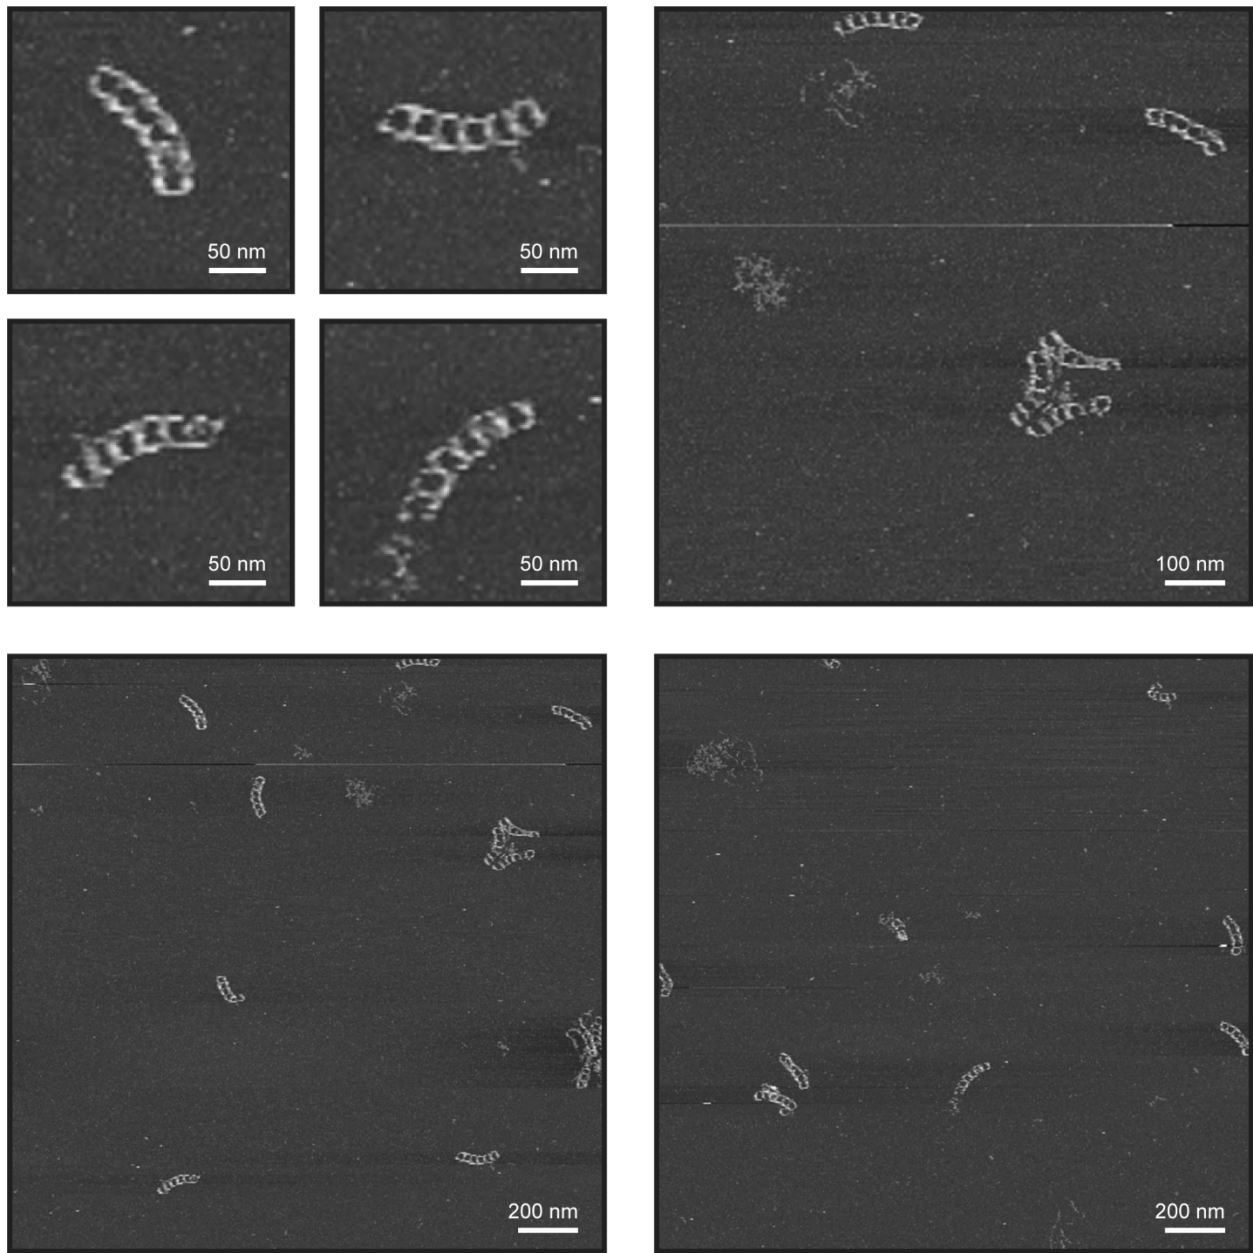

**Supplementary Figure 36** AFM imaging of 6HB-based curved beam DNA origami of 42-bp edge-length.

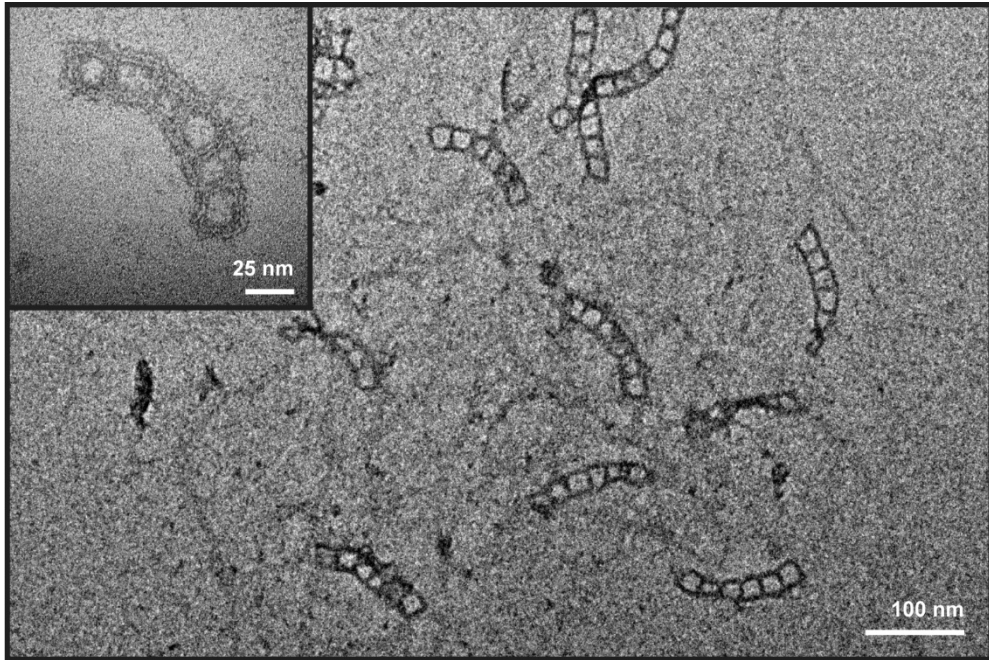

**Supplementary Figure 37** TEM imaging of 6HB-based curved beam DNA origami of 42-bp edge-length.

**Supplementary Table 4** Sequences for the 7,249-nt (#1) and 2,775-nt (#2) length scaffolds used.

| No | Scaffold sequence                                                                                                                                                                                                                                                                                                                                                                                                                                                                                                                                                                                                                                                                                                                                                                                                                                                                                                                                                                                                                                                                                                                                                                                                                                                                                                                                                                                                                                                                                                                                                                                                                                                                                                                                                                                                                                                                                                                                                                                                                                                                                                                                                                                                                                                                                                                                                                                                                                                                                                                                                                                                                                                                                                                                                                                                                                                                                                                                                                                                                                                                                                                                                                                                                                                                                                                                                                                                                                                                                                                                                                                                                                                                                                                                                                                                                                                                                                                                                                                                                                                                                                                                                                                                                                                                                                                                                                                                                                                                       |
|----|-----------------------------------------------------------------------------------------------------------------------------------------------------------------------------------------------------------------------------------------------------------------------------------------------------------------------------------------------------------------------------------------------------------------------------------------------------------------------------------------------------------------------------------------------------------------------------------------------------------------------------------------------------------------------------------------------------------------------------------------------------------------------------------------------------------------------------------------------------------------------------------------------------------------------------------------------------------------------------------------------------------------------------------------------------------------------------------------------------------------------------------------------------------------------------------------------------------------------------------------------------------------------------------------------------------------------------------------------------------------------------------------------------------------------------------------------------------------------------------------------------------------------------------------------------------------------------------------------------------------------------------------------------------------------------------------------------------------------------------------------------------------------------------------------------------------------------------------------------------------------------------------------------------------------------------------------------------------------------------------------------------------------------------------------------------------------------------------------------------------------------------------------------------------------------------------------------------------------------------------------------------------------------------------------------------------------------------------------------------------------------------------------------------------------------------------------------------------------------------------------------------------------------------------------------------------------------------------------------------------------------------------------------------------------------------------------------------------------------------------------------------------------------------------------------------------------------------------------------------------------------------------------------------------------------------------------------------------------------------------------------------------------------------------------------------------------------------------------------------------------------------------------------------------------------------------------------------------------------------------------------------------------------------------------------------------------------------------------------------------------------------------------------------------------------------------------------------------------------------------------------------------------------------------------------------------------------------------------------------------------------------------------------------------------------------------------------------------------------------------------------------------------------------------------------------------------------------------------------------------------------------------------------------------------------------------------------------------------------------------------------------------------------------------------------------------------------------------------------------------------------------------------------------------------------------------------------------------------------------------------------------------------------------------------------------------------------------------------------------------------------------------------------------------------------------------------------------------------------------------|
| #1 | <p>AATGCTACTACTATTAGTAGAATTGATGCCACCTTTTCAGCTCGCGCCCAATGAAAATATAGCTAAACAGGTTATTGACC<br/> ATTTGCGAAATGTATCTAATGGTCAAACCTAACTACTCGTTCGAGCAATTGGGAATCAACTGTTATATGGAATGAAACTTC<br/> CAGACACCGTACTTTAGTTGCATATTTAAAACATGTTGAGCTACAGCATTATTCAGCAATTAAGCTCTAAGCCATCCGCA<br/> AAAATGACCTCTTATCAAAGGAGCAATTAAGGTTACTCTCTAATCTGACCTGTTGGAGTTTGCTTCCGGTCTGGTTCGCT<br/> TTGAAGCTCGAATTAACGCGATATTTGAAGTCTTTCCGGCTTCTCTTAATCTTTTTGATGCAATCCGCTTTGCTTCTGA<br/> CTATAATAGTCAGGGTAAAGACCTGATTTTGGATTATGGTCATTCTCGTTTTCTGAACTGTTAAAGCATTGAGGGGGAT<br/> TCAATGAATATTTATGACGATTCGCGAGTATTGGACGCTATCCAGTCTAAACATTTTACTATTACCCCTCTGGCAAACTT<br/> CTTTTGCAAAAGCCTCTCGCTATTTGGTTTTATCGTCTGCTGGTAAACGAGGGTTATGATAGTGTGCTTCTACTATGCC<br/> TCGTAATTCCTTTGGCGTTATGTATCTGCATTAGTTGAATGTGGTATTCTAAATCTCAACTGATGAATCTTTTACCTGT<br/> AATAATGTTGTTCCGTTAGTTCGTTTTATTAACGTAGATTTTCTCCCAACGTCCTGACTGGTATAATGAGCCAGTCTTA<br/> AAATCGCATAAGGTAATCACAATGATTAAGTTGAAATTAACCATCTCAAGCCCAATTTACTACTCGTCTGGTGTCTTCT<br/> CGTCAGGGCAAGCCTTATTCAGTGAATGAGCAGCTTTGTTACGTTGATTTGGGTAATGAATATCCGGTTCTTGTCAAGATTA<br/> CTCTTGATGAAGGTGAGCCAGCCTATGCGCCTGGTCTGTACACCGTTCATCTGTCTCTTTCAAAGTTGGTCAGTTCGGTTC<br/> CCTTATGATTGACCGTCTGCGCCTGTTCCGGCTAAGTAACATGGAGCAGGTCGCGGATTTGACACAATTTATCAGGCGAT<br/> GATACAATCTCCGTTGACTTTGTTTCCGCTGGTATAATCGTGGGGTCAAAGATGAGTGTGTTAGTGTATTCTTTTG<br/> CCTCTTTGTTTTAGGTTGGTGCCTTCGTAGTGGCATTACGTATTTACCCGTTAATGGAACTTCTCATGAAAAAGTCT<br/> TTAGTCTCAAAGCCTCTGTAGCCGTTGCTACCCTCGTCCGATGCTGTCTTTGCTGCTGAGGGTGACGATCCCGCAAAAG<br/> CGGCCTTAACTCCCTGCAAGCCTCAGCGACCGAATATATCGGTTATGCGTGGGCGATGGTGTGTTGTCATTGTCGGCGCAAC<br/> TATCGGTATCAAGCTGTTAAGAAATTCACCTCGAAAGCAAGCTGATAAACCAGTACAATTAAGGCTCCTTTTGGAGCCTT<br/> TTTTTGGAGATTTTCAACGTGAAAAAATTTATTTCGCAATTCCTTTAGTTGTTCCCTTTCTATTCTCACTCCGCTGAAACT<br/> GTTGAAAGTTGTTAGCAAAATCCCATACAGAAAATTCATTTACTAACGCTTGAAAGACGACAAAACCTTAGATCGTTACG<br/> CTAACTATGAGGGCTGTCTGTGGAATGCTACAGGCGTTGAGTTGTTACTGGTGACGAAACTCAGTGTACGGTACATGGGT<br/> TCCTATTGGGCTTGCTATCCCTGAAAATGAGGGTGGTGGCTGAGGGTGGCGGTTCTGAGGGTGGCGGTTCTGAGGGTGGC<br/> GGTACTAAACCTCCTGAGTACGGTGATACACCTATTCCGGCTATACTTATATCAACCTCTCGACGGCACTTATCCGCTG<br/> GTACTGAGCAAAACCCGCTAATCCTAATCCTTCTCTTGAGGAGTCTCAGCCTTAAATACTTTTATGTTTTCAGAAATAG<br/> GTTCCGAAATAGGCGAGGGGCTAATGTTTATACGGGCACTGTTACTCAAGGCACTGACCCCGTTAAACTTATTACCAG<br/> TACTCTCTGTATCATCAAAGCCATGTATGACGTTACTGGAACGGTAAATTCAGAGACTGCGCTTCCATTCTGGCTTTA<br/> ATGAGGATTTATTTGTTTGTGAATATCAAGGCCAATCGTCTGACCTGCCCTCAACCTCTGTCAATGCTGCGGCGGCTCTGG<br/> TGGTGGTTCTGGTGGCGGCTCTGAGGGTGGTGGCTCTGAGGGTGGCGGTTCTGAGGGTGGCGGCTCTGAGGGAGGCGGTTCC<br/> GGTGGTGGCTCTGTTCCGGTGATTTTATTATGAAAAGATGGCAAACGCTAATAAGGGGGCTATGACCAGAAATGCCGATG<br/> AAAACGCGCTACAGTCTGACGCTAAAGGCAAACTTGATTCGTGCTACTGATTACGGTGTCTGATCGATGGTTTATTGG<br/> TGACGTTTCCGGCCTTGCTAATGTTAATGGTGTACTGGTATTTTCTGGCTCTAATTCCTCAATGGCTCAAGTCCGTGAC<br/> GGTATAATTCACCTTAAATGAATAATTTCCGTCATATTTACCTTCCCTCCCTCAATCGGTTGAATGTGCGCCTTTTGTCT<br/> TTGGCGCTGGTAAACCATATGAATTTTCTATTGATTGTGACAAAATAAACTATTCCGTGGTGTCTTTGCGTTTCTTTATA<br/> GTATTCCGTTATTATTGCGTTTCCCTCGTTTCTTCTGTAACCTTTGTTGAACTTTGTTGCGGCTATCTGCTTACTTTTCTTAA<br/> AAAAAGGGCTT<br/> CGGTAAGATAGCTATTGCTATTTTATTGTTTCTTCTCTTATTATTGGGCTTAACTCAATTCCTGTGGGTTATCTCTCTGAT<br/> ATTAGCGCTCAATTACCCTCTGACTTTGTTAGGGTGTTCAGTTAATTCCTCCGCTCAATGCGCTTCCCTGTTTTTATGTTA<br/> TTCTCTCTGTAAGGCTGCTATTTTCTTTTACGTTAAACAAAAATCGTTTCTTATTGGATTGGGATAAATAATATGG<br/> CTGTTTATTTTGAACCTGCAAAATAGGCTCTGGAAAGACGCTCGTTAGCGTTGGTAAGATTACAGGATAAAATGTAGCTGG<br/> GTGCAAAATAGCAACTAATCTTGATTTAAGGCTTCAAACCTCCCGCAAGTGGGAGGTTTCGCTAAAACGCTTCCGCTTCT<br/> AGAATACCGGATAAGCCTTCTATATCTGATTTGCTTGCTATTGGGCGCGGTAATGATTCCTACGATGAAAATAAAACGGCT<br/> TGCTGTTTCTCGATGAGTGGGCTACTTGGTTTAAACCCGTTCTTGGAAATGATAAGGAAAGACAGCCGATTATTGATTGGTT<br/> TCTACATGCTCGTAAATAGGATGGGATATTATTTTCTGTTTCTGGAACTTATCTATTGTTGATAAACAGGCGGCTTCTGCA<br/> TTAGCTGAACATGTTGTTTATTGCTGCTGCTGGACAGAATTACTTTACCTTTTGTGCGTACTTTATATTCTCTTATTACTG<br/> GCTCGAAAATGCCTCTGCCTAAATTACATGTTGGCGTTGTTAAATATGGCGATTCTCAATTAAGCCCTACTGTTGAGCGTTG<br/> GCTTTTACTGGTAAGAATTTGTATAACGCATATGATACTAAACAGGCTTTTTCTAGTAATTATGATTCGGGTGTTTATTCT<br/> TATTTAACGCTTATTTATCACAGGTCGGTATTTCAAACATTAATTTAGGTGAGAAGATGAAATTAACATAAAATATATT<br/> TGAAAAAGTTTTCTCGCTTCTTTGCTTTCGCGATTGGATTGTCATCAGCATTACATATAGTTATAAACCCAACCTAAGCC<br/> GGAGGTTAAAAAGGTAGTCTCTCAGACCTATGATTTTGTATAAATTAATGACTTCTCTCAGCGTCTAATCTAAGCTAT<br/> CGTATGTTTTCAAGGATTTAAGGGAAAATTAATTAATAGCGACGATTTACAGAAGCAAGGTTATTCACTCACATATTTG</p> |





|                                                                                                                                                                                                                                                                                                                                                                                                                                                                                                                                                                                                                                                                                                                                                                                                                                                                                                                                                                                                                                                                                                                                                           |
|-----------------------------------------------------------------------------------------------------------------------------------------------------------------------------------------------------------------------------------------------------------------------------------------------------------------------------------------------------------------------------------------------------------------------------------------------------------------------------------------------------------------------------------------------------------------------------------------------------------------------------------------------------------------------------------------------------------------------------------------------------------------------------------------------------------------------------------------------------------------------------------------------------------------------------------------------------------------------------------------------------------------------------------------------------------------------------------------------------------------------------------------------------------|
| <p>TTTAAGGTCACATCGCATGTAATTTACTTATTCTCTGTTGTTGAGCCACCCGGGCGCCAGATTTTGTAAAGCTTTGTCTC<br/> TTAGTTTGTATAGACAGATTTCAGAGTGCAAGGTTTCGTTTCGCTCGTACCTGGTTTTCCCTGGTCTTCACAGATAGGATTTG<br/> ACTTTCTACAACCTTATGCGGCTTCTACCCGTTTGAAGGCCGATACAGGTGCTGCGCAAAATGCGGGCGAACATAGAGTA<br/> TCAAAACAACGCCTTCTAATCTAGGAATATAGGGAAGATACGTATTTGCTACCATGCTTTCTGGGGTCATTAACGACCAACC<br/> TCTTTTCTTTAAAGTAGGATTGCAACAATGAATGAATACACGTGGTCCGATAACTGACCAAGTAACATGGTTATCACTCGAT<br/> GTCCGCCAGACGTGTGCAAACCAACCCGGGAGTTACGTCATAATCCTTCGCTACGTCGTGAAGATATTTACTTGTGAATAT<br/> CGAGGGTAATAAGATAATAGACTGTGACTAGTATTGCCAGACTGTCGCTACCTGCAACACATAACTATCCTGAGGTTACTGC<br/> ATAGTACTGATTACCCCGAGTCAAATTTCTAACCTTCTAACATGTACCTAGTAACAGCTCAATAATTATGTCAGAATATA<br/> GCTCTGGGAACCTCGGACAATTATGATACACGGTATTAATATCTTGCTTGCCTTAGCCACTTCTCATCTTTGGATACCGAT<br/> TCTATTTTGCATAGCAGTTCCTTTACACATATAAGAATTCGCCATAGGTATGACCTACCCAGATCGTCGATTATCTGCT<br/> GGAAAATTTATTAACACTATGTTTCTCTCCAGATGTGAGTATACACGATAAATAATACCTGGTACCGTTGGTGTATTA<br/> CCTTGTCTTAAGTGCTTAATCGCGCTTAGTGATAAGGTTGACTAGTCGACGCGTGGCCGCAATTATCTTGTGCATAAT<br/> TTGACTTTGTTCTATATGACTATGATCTCTGTCATCTCACCTATTGATGCCACCTTTTCAGCCTGCAG</p> |
|-----------------------------------------------------------------------------------------------------------------------------------------------------------------------------------------------------------------------------------------------------------------------------------------------------------------------------------------------------------------------------------------------------------------------------------------------------------------------------------------------------------------------------------------------------------------------------------------------------------------------------------------------------------------------------------------------------------------------------------------------------------------------------------------------------------------------------------------------------------------------------------------------------------------------------------------------------------------------------------------------------------------------------------------------------------------------------------------------------------------------------------------------------------|

**Supplementary Table 5** Staple sequence for the DX-based square DNA origami of 84-bp edge-length. The sequence is represented by colors; unpaired nucleotides with blue, crossovers with orange, and the 14-nt seed dsDNA domain with green.

| Staple ID | Length (bp) | Staple sequences                                           |
|-----------|-------------|------------------------------------------------------------|
| 1         | 58          | ATAACCATGAGTGTGGCTGGTTTATTGCTGCTCGGCCCTTCGGGCATAACACTGCGGC |
| 2         | 58          | ATACATTCAAATAGCGGTATTATCCCGTAAGTTCGCTATGTGGCTGTATCCGCTCAT  |
| 3         | 58          | GGTTGAGTACTCATTAGATTGATTTAAATTTACTCATATATACTCCAGTCACAGAAA  |
| 4         | 54          | CGCGGTTTTTTTTCCCCTATTTGTGATAAATGCTTTTTTTTAATAATATTGAA      |
| 5         | 53          | TAAACGAATAGCCTCTCCATTTCCAAGAGTTTGAGGGGACGACGCGAAATGTG      |
| 6         | 53          | ATCAGGGCGATGGCCACTTTTCGTGAACCATCACCTAATCAAGTTAATAG         |
| 7         | 53          | GCTCATTTTTTAACCAATATTTGCCGAAATCGGCAAAATCCCTTATAAGATAG      |
| 8         | 53          | AGAAAGCGAAAGGAGCGGGTTTGTAGGGCGCTGGCAAGTGTAGCGGTGTGAA       |
| 9         | 53          | ACTGGTTTTTTTGAGGCGGATACGTGGGTCTCGTTTTTTTGGTATCATTGCA       |
| 10        | 53          | GTGCCTTTTTTCTGATTAAGCATCTAGGTGAATTTTTTTATCCTTTTTGAT        |
| 11        | 53          | AGTAATTTTTTATGCTGAAGAGAGCTGAATGATTTTTTTGCCATACCAAAC        |
| 12        | 52          | GATCGGTTTTTAGGACCGAAGTTTCGCCCGTTTTAAGAAGGTTTCGGTCT         |
| 13        | 51          | GCCGCTTTTTATACACTATTTGGCATGACAGTTTTTAAGAGAATTAACAAC        |
| 14        | 47          | GTTTCTTAGACGTATACGCCTATTTTTATAGGTTAATGTTTCAGACCC           |
| 15        | 42          | AACATTTCCGTGCGTTGCGCTCAGAATAAGTAATGAGTATTC                 |
| 16        | 42          | TTCCCTTTTTTGCTACAGGGCGCACATTAATTGTCGCCCTTA                 |
| 17        | 42          | GCCTTCTGTACCCGCGCGCTTAATGCGCGCGGCATTTT                     |
| 18        | 42          | CAGAAACGCTGCACGCTGCGCTAACCACTTTGCTCACC                     |
| 19        | 42          | CTTTTTTGCAACAGCGGTAAGATCCTTGAGAGGAGCTAACCG                 |
| 20        | 42          | ATCATGTAACTTACATCGAAGTGGATCTCAAAACATGGGGG                  |
| 21        | 42          | GTTGGGAACCGTCAGTTGGGTGCACGAGTGGGCGCCTTGATC                 |
| 22        | 42          | CCTGTAGCAAATGACGGGAAAGCCGGCGAACACCACGATG                   |
| 23        | 42          | TTGCGCAAACAGGGAGCCCCGATTTAGAGCGGCAACAACG                   |
| 24        | 42          | GAACTACTTACAGCACTAAATCGGAACCTAAATTAAGTGGC                  |
| 25        | 42          | CGGCAACAATTTTGGGGTCGAGGTGCCGTAATCTAGCTTCC                  |
| 26        | 42          | GCAAGAGCAAATCCAATGATGAGCACTTTTAATTGACGCCGG                 |
| 27        | 42          | GAGCCGGTGAAGAGTTGCAGGACCACTTCTGCGATAAATCTG                 |
| 28        | 42          | CCCTCCCGTATAAAGAAGCTGGACTCCAACGTAGATGGTAAG                 |
| 29        | 42          | TACACGACGGTGGAAACAAGAGTCCACTATTCGTAGTTATC                  |
| 30        | 42          | ACTATGGATGAAGGGTTGAGTGTGTTCCAGTAGTCAGGCA                   |

|    |    |                                                              |
|----|----|--------------------------------------------------------------|
| 31 | 42 | CAGATCGCTG <b>AAT</b> CAAAAGA <b>ATAGACCGAGAT</b> ACGAAATAGA |
| 32 | 42 | AATTTAAAAG <b>GATTGGTAACTGTCAGACCAAGC</b> TTCATTTTT          |
| 33 | 42 | TAACGTGAGT <b>TTGTACCCCGTTGTAATTCGCC</b> AAAATCCCT           |
| 34 | 42 | TTTTCGGGGA <b>AATTCGACGAAAGGGCTCGTGC</b> AGGTGGCAC           |
| 35 | 37 | CAATCAT <b>ATTCGTTCCACTGAGCG</b> CATGATAATAATG               |
| 36 | 31 | AAAGGAAGAG <b>TAATTACATGCGATGTGACCT</b>                      |
| 37 | 31 | GACGAGCGTG <b>ACGTGGCGAGAAAGGAAGGGA</b>                      |
| 38 | 31 | GCACTGGGGC <b>CCAAAGGGCGAAAAACCGTCT</b>                      |
| 39 | 31 | AATCTCATGA <b>CGTTAAATTTTTGTTAAATCA</b>                      |
| 40 | 26 | CAACTTACTTCT <b>GAT</b> GCAGTGC <b>TGCC</b>                  |
| 41 | 26 | AGCATCTTACGG <b>ACT</b> CAGAATGACTT                          |
| 42 | 26 | GAGACAATAAC <b>CTT</b> TATTTTTCTAA                           |

**Supplementary Table 6** Staple sequence for the 6HB-based square DNA origami of 84-bp edge-length. The sequence is represented by colors; unpaired nucleotides with blue, crossovers with orange, the 14-nt seed dsDNA domain with green, and the 4-nt dsDNA domain with red.

| Staple ID | Length (bp) | Staple sequences                                                                                             |
|-----------|-------------|--------------------------------------------------------------------------------------------------------------|
| 1         | 59          | TGTTGTTCC <b>AAGT</b> TAATGCC <b>CCCTATGGCT</b> TTTTGATGATAC <b>AGGAT</b> ATAAA <b>CGTT</b> TGGA             |
| 2         | 59          | ATCGTCACC <b>CAAAGGCT</b> CAAA <b>AGGTA</b> AATATTGAC <b>CGAAATTAC</b> CAAAA <b>AT</b> CAGCAG                |
| 3         | 59          | TCAATAACC <b>TACTCAGGAGGTTTACACCACCCTCAGAGCCGCCACT</b> CACCG <b>TGTT</b> TAGC                                |
| 4         | 59          | <b>CTTA</b> TTTTTTGAAAACATAG <b>A</b> CATTATC <b>TTTTTTTT</b> TGCGGA <b>CTTA</b> ATT <b>TT</b> CACCAG        |
| 5         | 59          | GACAG <b>AACGATCTGA</b> ATACACTAAA <b>AACTCATCTCATAGTTAGCGTAA</b> TCAAGTTTGC                                 |
| 6         | 58          | TAGCGAGAGGCTTT <b>TTTAAGAAGTTTTGCCAGAGA</b> TACATAACG <b>TTTTTTTT</b> CAAAAG                                 |
| 7         | 58          | ATTCTAAGAA <b>TTTT</b> GCGTTT <b>CCCCCTTTTT</b> TAA <b>CGATTATT</b> TTTGGCAGATT <b>CC</b>                    |
| 8         | 58          | ATTTAACAATTT <b>TTTTATTACGTTTTTTAATGGA</b> TCAATATA <b>TTTTTTTT</b> CCTGAT                                   |
| 9         | 57          | GGGTAATTG <b>TTTT</b> TAATATCAGAG <b>AA</b> TAAAGAGCAAGA <b>TTTTTTT</b> ATGAAATAGCAAT                        |
| 10        | 56          | ACTTTA <b>CAC</b> ATT <b>GGG</b> AGGCCGATT <b>TTTT</b> TAGGGATTT <b>AGT</b> GAAAT <b>GAG</b> TT <b>CAG</b>   |
| 11        | 56          | AATAGAT <b>GACCAGGT</b> AATAAAACGA <b>TTTTT</b> TAAACGGAACA <b>AA</b> TGAA <b>TAG</b> CGAAC                  |
| 12        | 55          | CTCAA <b>CC</b> CAGTACAA <b>ACTACG</b> GCATT <b>CCCTCGTTACCAGAGAGCAAC</b> AAAGTA                             |
| 13        | 55          | GATAAA <b>AGCCAGCAGCAAATA</b> AGGTG <b>GGAGGGTTGATATAAC</b> GCCAG <b>CA</b> TAA <b>CAT</b>                   |
| 14        | 55          | CGCTGC <b>GC</b> AGGCG <b>ATAGCGGGTTTTGC</b> TTGAT <b>ACCCTAAAACATCGCG</b> TCAGT                             |
| 15        | 55          | TTTGT <b>TGGGAAGCGCATTAGA</b> ACGGC <b>TAATTGCGAATAATAC</b> CGTCA <b>CT</b> CCTTAT                           |
| 16        | 55          | AGTAGG <b>GG</b> AAGTT <b>TAACAGTTTCAGCGGT</b> CACCA <b>GAATAAACAGCCAT</b> AAAATA                            |
| 17        | 55          | ACGAGT <b>AA</b> AGTTT <b>CAGCC</b> AATAG <b>GA</b> ACTT <b>CATAATTCAAAGCGAACCA</b> CTTTTG                   |
| 18        | 55          | TAGGTT <b>GT</b> GAGAA <b>GAGCAAATCAGATA</b> TAGAACG <b>CAATATATTTTAGT</b> CCCGAA                            |
| 19        | 55          | CTCCTT <b>ATA</b> AGCA <b>GAACAGAAATAAAGAC</b> GCGCA <b>GGTCA</b> CAAT <b>CAATAG</b> AGTTGC                  |
| 20        | 54          | TGACCT <b>TTTT</b> AATGGT <b>TGG</b> ACAGAT <b>TTT</b> GTGTAC <b>AT</b> AGAGCC <b>TTT</b> AGATAATA <b>AA</b> |
| 21        | 53          | GGGAAGAAA <b>TTTTTT</b> AGGAGCGGGCGCTAGGGCGCTGG <b>CGGTGGT</b> TCCTCAAG                                      |
| 22        | 53          | AATGCAGGGGGTA <b>ACC</b> CAGCTACA <b>ATTTTATCCTGAATTTTTT</b> CAACGCTAA                                       |
| 23        | 53          | AGTAA <b>ACC</b> GCCA <b>GAAGCAAAGCGGATTGCATCAAAA</b> TTTTTTAAGAGGAAG                                        |
| 24        | 53          | TAGTATCAT <b>TTTTTTTT</b> TACAA <b>ATTTACCAGTATAAAA</b> ATAC <b>GG</b> GATTTT                                |
| 25        | 53          | AACAAAGCT <b>TTTTTTTT</b> CAGTGAATA <b>AGGCTTGCCCTGATT</b> GATT <b>CC</b> CTCAT                              |
| 26        | 53          | CCCAAT <b>AG</b> ATAAC <b>CA</b> TATCC <b>ATCCTTTTTTTT</b> AATTTACG <b>GA</b> AAGTCAGA                       |
| 27        | 52          | AGGTGT <b>AC</b> AGAAC <b>CGAAGA</b> ACTCAA <b>ACTATCGGCCTTGCTTTTT</b> TATCCAGAA                             |
| 28        | 51          | CAGACGT <b>TA</b> ACCTAAAACGA <b>TTTT</b> GCAAAA <b>AAAGTTTTGTTTT</b> GTCTTTC                                |
| 29        | 51          | CCTCAGA <b>ATT</b> AGTTT <b>GACCTTTT</b> ATACAT <b>CACCCTCAGTTTTT</b> CCGCCAC                                |
| 30        | 51          | TCAAACCCT <b>TTTTATATCTGGT</b> CAGTT <b>GGCAAATCAATACCA</b> ACTTATGC                                         |
| 31        | 51          | AAACATGA <b>ATAAAT</b> CAAAAG <b>TTTT</b> CCCGA <b>GT</b> CGGAACCT <b>TTTTT</b> TATCTG                       |

|    |    |                                                     |
|----|----|-----------------------------------------------------|
| 32 | 51 | AGCTTGCTAGGCTTGCAGGGTTTTAAGGCCTAATTGTATTTTTGTTTATC  |
| 33 | 50 | CGTTATTTATATAA CTTTTT CGCCTGTTTATCAACAATAGCAAGTCAAT |
| 34 | 50 | AAAATCTTTCATTAGTATTAACCAAGTACCGCACTCATTTTTACAAGCA   |
| 35 | 50 | CATAGTAACGACGAAGCGCGTTTTTCATCAACGCCCAAGCGCGACTGTAG  |
| 36 | 50 | GCAGCCTAATTGAGAGTTACAATAGCACCATTACCAA ACTTTCCATTAA  |
| 37 | 50 | ATTAACTAACCACCCTGATA GTTCACAAACAATATTAGGATAAATCCT   |
| 38 | 50 | ATAAGAAAATTGGGCTTCGAGCTCAAATCACCGGAGATAGCAATCCAT    |
| 39 | 50 | GAGCCGCGTATAGCGGGCGGAGCTGAAGAAAAATTTGATTAGGCAGAA    |
| 40 | 50 | ATTATCAATTTTTTGGAAACGAGGGTAGCACGGGAGTCGGCTGTCCGATTT |
| 41 | 50 | GCCGACACGCAGTATTTATTTTAGGCGAATTATTCACACGTAAATAGCCG  |
| 42 | 49 | TGATTGCTTAACGTCAGTTTTTTTGAATATACAGTAACAGTCAGTTAAG   |
| 43 | 48 | CCGCCACCCTCAGTTTTCCACCCTCAGAGCGTACCCTTCGCAAATGG     |
| 44 | 48 | TCTGAATTTACCGTTTTGTAAGCGTCATA CGCCTATATAGGGTTGAG    |
| 45 | 48 | AGGGCGACATTCATTTTTTGTAGGGAGGGAAGAGCCTTGCTTTTGCGGG   |
| 46 | 48 | AGAATAACATGACTAAATAGAAAGGAACAATGGGAATTCCEAATCCA     |
| 47 | 48 | TGCGGATGGCCA ACTAACCGTAACACTGAGTCTTATTAAAGCAA ACTCC |
| 48 | 48 | AACAGTGCCAATAGTAGCAGGCGGATAAGTGGAGGCAGAATACCGAAC    |
| 49 | 47 | GGCGAAATCAAGTGATGATGGCAATTCAAACAGTCTGAAAGCGTA       |
| 50 | 47 | CAACGGAATTATACGTAGCATTCCACAGAGACTGTTAAAAACCAAAA     |
| 51 | 47 | AACGTCATCCACTAAGTAACAGTGCCCGGTGTACTAAATTAATTAC      |
| 52 | 46 | GCTCCATGTTATAGAAAAGGCATTTTTCGAGCCTTTTGCATAGTAAA     |
| 53 | 46 | CCATCACCCAAGTGGCGATGGTTGCTTTGACGCTTCTGAACATAAA      |
| 54 | 46 | AGCTATCTTACCACGATAGCTTGATACCGATAAAATTCCAAGTT        |
| 55 | 45 | ACAAGAGAAGGGCGTGGATTATACTTCTAGAAAA CGTAATAAGT       |
| 56 | 45 | GCTTTCCTGGCCATGAATAACCTTGCTGGAATTAAAGCACTAA         |
| 57 | 45 | CAATATTAGAGTCTGTCCTTTTTTTTTTCACGCAAACTCTCAAATA      |
| 58 | 45 | CTTTAGCGTCA CAGCCCTTTGACCCCAAGCGGATTTGTTACGAGG      |
| 59 | 44 | ACCATCGCCGAAGCCTAGATTTTCAGGTTTTGAATAATATGGT         |
| 60 | 44 | GAATTTCCAATGAAACCATCGATAGCAGCACTTTT CAGTAGC         |
| 61 | 42 | ATTCCTGATGTGAGACAGAGATAGAACCAGCACGTGAAAGCC          |
| 62 | 42 | GAACAAGGTAGGA AATCATAGGTACCTTTTACATTTTTTAT          |
| 63 | 42 | AACGTCACGTGATGTAATGCCACTACGAAGGCACCAAGTAAAT         |
| 64 | 42 | CGGAACCGCCACCACCAATTCTGCGAACGAGTAGACCGCCAC          |
| 65 | 42 | TCAATATATTATCATTTTTTGGGGTCGAGTGACGGGATAACGT         |
| 66 | 42 | CCAGAA TTGAGACTCCGAAATCGGCAAAATCCCTTAAGTATT         |
| 67 | 42 | TCACACGCTAAACAGGATTTAGCTAAAGGGAGC CAATCAGA          |
| 68 | 42 | AACGGAAAGGTGGCAGTCAGTGCCTTGTAAAGAACAATAAT           |
| 69 | 42 | TTACCAGCTTAAACAACCGATATATTCGGTCGCTGTTTCGAGG         |
| 70 | 42 | TTTCATCAAAAATACACAAGAATATCGCAAGACA AAGTCCT          |
| 71 | 42 | GGGAACCAATAAGGAAAGGTAAGTAACTTTGCGGCGTCATA           |
| 72 | 42 | CGCGCCCAATAGATAGAACGCGAGAAAATATATGTTCCGGCT          |
| 73 | 42 | TGAGGAATGACAAAGGCTCATTATACCAAGCAGGTCATGGA           |
| 74 | 42 | AGAAACGATACATAATACCCAAAAGAACTTACCAAGTCAAAA          |
| 75 | 42 | AACAAAGTGGCATGAACGTAGAAAATA CCAAAGACTACCTGA         |
| 76 | 42 | CGAAAGACTGAA CCAATGTAGAAACCAAGAACGGAAGGTGA          |
| 77 | 42 | CATTCCATCAATAAAATTA ACTGAACA CAGCATCCACGTTG         |
| 78 | 42 | CTTTGAGAAAAACATAACGTCAAAAATGTTATTTATAGAGCC          |
| 79 | 42 | GCTAAACTTAGCA AAGCCTAATTTGCCAATCGCCAGCTCAAC         |
| 80 | 42 | ACGGGT AAGCCAACTATTTAACAACGCCTTTCCAGGCGCGGA         |
| 81 | 42 | CGAGCGTCAACATGTAA TTTTTTTTTTAGGCAGAACCTGTT          |
| 82 | 42 | GGACATTTGTTAGCCGATTTAGAGCTGTGCCGTTATCAT             |
| 83 | 42 | CTCCCGATCTGTC CCGACCGTGTGATAGAACTGAA CAGGTA         |
| 84 | 42 | GAAAGATGCGGAA TGAGGTTTTGAAGCACCGACACGTTAAA          |
| 85 | 42 | ATAAAGTTAAATCTAGCGTCCAATACTTCATCAGATCATAA           |

|     |    |                                                                               |
|-----|----|-------------------------------------------------------------------------------|
| 86  | 42 | TAAGAA <b>TACGGT</b> <b>CATTGAGATT</b> <b>AGGAAG</b> ACTGG <b>AA</b> AGATTA   |
| 87  | 42 | ATGTTT <b>AT</b> ACCAC <b>AGGAACGAGGCGCAGAA</b> ACAC <b>CA</b> GAGAAT         |
| 88  | 42 | GTTGCT <b>AA</b> GTAAT <b>AGGAATCATAATT</b> <b>ACCTTAGCCT</b> TCAACT          |
| 89  | 42 | TTATTT <b>GTTT</b> CAAT <b>TACCACGGAATAAGT</b> GTTAGC <b>AA</b> TTAAGA        |
| 90  | 42 | GAATATAATGA <b>AC</b> ACTATCATGGATTAGAGAG <b>TT</b> TAATTGCT                  |
| 91  | 42 | AAATAT <b>GTT</b> AGAG <b>CACCTTTAATTGCT</b> <b>CGACCGGAG</b> CGTTTG          |
| 92  | 42 | TTTCAG <b>GACC</b> AGAG <b>GATATCGCGTTTTAATT</b> GAGAT <b>TC</b> ACCAGA       |
| 93  | 42 | ATAAC <b>AGC</b> GAGAA <b>AGGTTTAATTTCAACA</b> CTTCA <b>ACC</b> ACCAC         |
| 94  | 42 | CCCGAAA <b>GTT</b> AATCAT <b>TTTTTTTT</b> GTGAATTA <b>CA</b> TCAACGT          |
| 95  | 42 | AGAAAA <b>AGA</b> ATGA <b>CGACGCTCAATCGT</b> <b>CACAGGAA</b> ACAAC            |
| 96  | 42 | AAAAC <b>GAT</b> CTACG <b>TCGCATAGGCTGGCT</b> GAGCAC <b>TC</b> GGTACG         |
| 97  | 42 | CCAGAA <b>TAC</b> ATTT <b>TCATAAATCAAAAAT</b> T <b>CAGGACAT</b> CAAGA         |
| 98  | 42 | AATAC <b>CTC</b> TGAG <b>ATAAAATATCTTTAGG</b> ACCTT <b>CG</b> TTGGGA          |
| 99  | 42 | GTAAT <b>CTG</b> TTAT <b>CAGT</b> TTTTT <b>ATAATAAA</b> AC <b>CT</b> TACCCT   |
| 100 | 42 | GATTTT <b>AAT</b> AGT <b>CACCATTGCAACAGGAC</b> AGTGA <b>GA</b> AGGAAT         |
| 101 | 42 | GACTAT <b>TAGA</b> ACT <b>GAACCGGATATT</b> <b>CATCAGTTGAG</b> CCACCG          |
| 102 | 42 | TATATTT <b>GCTGA</b> <b>ATAACCGTTGTAGCACT</b> GAGT <b>AA</b> CCACCA           |
| 103 | 42 | CACTT <b>GCA</b> TACTT <b>CCTAAAGCATCACCTT</b> CATTT <b>GC</b> CGGAAT         |
| 104 | 42 | TCTACT <b>ACG</b> CTGA <b>GACAGAGGTGAGGCGC</b> ATTAA <b>AG</b> TCAGAC         |
| 105 | 42 | AGAAG <b>GAA</b> ATCCT <b>CCTTTAATGC</b> <b>CGGAAC</b> ACCC <b>CG</b> CGGTCA  |
| 106 | 42 | GTTTG <b>ATA</b> AGTGT <b>ACGCGCTTAATGCGCT</b> ATTAGT <b>AT</b> TAAAG         |
| 107 | 42 | TGAATGG <b>CCG</b> CTACAGG <b>TTTTTTTT</b> CGCGTACT <b>AG</b> AAAGGAA         |
| 108 | 42 | GCGGG <b>GAC</b> CCAGT <b>AATCGTCGCTATTAAA</b> AGAA <b>AG</b> TATTAG          |
| 109 | 41 | <b>CAATTTTT</b> <b>ACTCGTATTAAATCCTTT</b> <b>GTAATTTCT</b> GTTCAG             |
| 110 | 41 | AATATT <b>CC</b> ATTAT <b>TCCA</b> ACTTT <b>GAAAGAT</b> GAAAT <b>AA</b> GACGA |
| 111 | 40 | CTAAT <b>GCA</b> GAAAG <b>GCTTAGATTAAGACGCGG</b> TAAATTTAAA                   |
| 112 | 40 | ACAAAA <b>TA</b> ATTG <b>CGCTTTTTAAGAAAAGT</b> TAATGACAACA                    |
| 113 | 40 | TGCAAATCCAT <b>GTGAGAGACTACCTTT</b> TATCA <b>AT</b> CATTAC                    |
| 114 | 40 | GAGGAAACGCG <b>TGGAAGGGTTAGAAC</b> AGATG <b>AA</b> TATAAA                     |
| 115 | 39 | AATAAGAAAT <b>TCGACTTGAGCCAT</b> <b>TCTAAAGGA</b> CAGAGG                      |
| 116 | 39 | AACAGGTCAA <b>ATCGGT</b> CATAG <b>CCCTTC</b> GTCA <b>AT</b> GT                |
| 117 | 39 | GAACCACCAT <b>AATTGACAGGAGGT</b> <b>TCCGTCGAC</b> ATCAAT                      |
| 118 | 39 | AGCAAAA <b>AGT</b> GAG <b>AGACTTTTT</b> CAT <b>GAGCTTTT</b> ACAGAG            |
| 119 | 39 | CCATCT <b>TC</b> CATGT <b>AAGTACGGTGTCTGGG</b> TGGTCATTTT                     |
| 120 | 39 | GATTGG <b>CT</b> CAGT <b>CTAGCATTGCC</b> <b>CAGCG</b> ACC <b>GCCTGC</b>       |
| 121 | 39 | <b>GAAATATCATCGCCTGATAAATTTTT</b> AAATCCGCGACCT                               |
| 122 | 39 | ATCGGAACCA <b>ACCACCAGAAGGAGCT</b> CTGTAA <b>ATAAA</b> AG                     |
| 123 | 39 | <b>TGTTAAAAACCGTCTATCAGGGTTTT</b> CCCACTACGTGAA                               |
| 124 | 39 | TTTAACGGGA <b>CTGAAACAACATCAGA</b> AATA <b>ATG</b> ACTCC                      |
| 125 | 33 | AGCC <b>GCGGG</b> GAGAAACA <b>TTTTTTTT</b> GGATT <b>CGCC</b>                  |
| 126 | 27 | AGAATACGTGGC <b>TTTTTT</b> CAATATTTT                                          |
| 127 | 26 | CGACA <b>TTTTTT</b> TAAACA <b>CAAT</b> CTTC                                   |
| 128 | 25 | AGTTTGAG <b>TC</b> GATAG <b>CTT</b> TATCCGGT                                  |
| 129 | 23 | GCAAAA <b>GCT</b> ACCA <b>TA</b> AGGAAACC                                     |
| 130 | 23 | AGTGA <b>ATTTT</b> AAC <b>CA</b> ATGCTGA                                      |
| 131 | 20 | CCTCAG <b>AGC</b> CTCCCTCAGAG                                                 |
| 132 | 20 | AAGAG <b>GCG</b> GAAAGCGCAGTC                                                 |
| 133 | 20 | TGAAT <b>TC</b> GCCAAAGACAAA                                                  |

**Supplementary Table 7** Staple sequence for the DX-based pentagonal DNA origami of 84-bp edge-length. The sequence is represented by colors; unpaired nucleotides with blue, crossovers with orange, and the 14-nt seed dsDNA domain with green.

| Staple ID | Length (bp) | Staple sequences                                                                           |
|-----------|-------------|--------------------------------------------------------------------------------------------|
| 1         | 58          | GAAGATCAGTTGGT <b>TGCGCTCGGCCCTTCGTTGCAGGACCACTTC</b> GTGCACGAGTGGG                        |
| 2         | 58          | TATTCCTTTTT <b>CATTGGTAACTGTCA</b> GTGCCTCACTGATTAAGGCCGCATTTTGCC                          |
| 3         | 58          | AGACAAAGCTTAA <b>ATAACCCTGATAAAATGATCCGCTCATGAGACA</b> AAACAAAATCTGGC                      |
| 4         | 58          | ATCCTTTTTGATA <b>TGTGAAGAACCAGGGAAAAGTCAAATCCTATC</b> ATCTCATGACCAA                        |
| 5         | 58          | GCCCCGAAGAACG <b>GGGGGATCATGTA</b> ACTTTTT <b>TGACAACAT</b> TTTTTCCAATGATG                 |
| 6         | 54          | CAACAG <b>TTTTTT</b> CGGTAAGAT <b>CT</b> TCTGCTATGT <b>TTTTTT</b> GGCGCGGTA <b>TGA</b> ACC |
| 7         | 54          | TGCAC <b>TTTTTTTT</b> TGAATCTGT <b>CA</b> ACAACAGAGA <b>TTTTTT</b> AGTAAATTACATG           |
| 8         | 53          | AACTA <b>TTTTTT</b> ATGAACGAA <b>AT</b> TTAGATTGAT <b>TTTTTT</b> AAAACCTCATTTT             |
| 9         | 53          | TACT <b>TTTTTT</b> ACAACGATC <b>GG</b> AGCTGAATGA <b>TTTTTT</b> CCATACCAAACGA              |
| 10        | 53          | TCCCG <b>TTTTTT</b> ACAATTAAT <b>AT</b> AAATCTGGAG <b>TTTTTT</b> GGTGAGCGTGGGT             |
| 11        | 53          | TACGC <b>TTTTTT</b> TTTTATAG <b>GT</b> GGTTGAGTAC <b>TTTTTT</b> ACCAGTCACAGAA              |
| 12        | 53          | ATGAG <b>TTTTTT</b> ATTCAACAT <b>TT</b> CACCCAGAAA <b>TTTTTT</b> CGCTGGTGA <b>AG</b> ATCT  |
| 13        | 50          | <b>CGCCCGC</b> ATTT <b>TGCGCAGTTTT</b> TGAT <b>CGGCCTTCAAACGGGT</b> AG <b>AC</b> CT        |
| 14        | 50          | <b>TAGGGCGCTGGCAAGTGT</b> TTTT <b>GTCACGCTGCGCGTA</b> ACCACC <b>ACC</b> GTGA               |
| 15        | 50          | <b>CGTCAGACCCCAATCAT</b> TTTT <b>CCCCGTTGTAATTCGCGTTAAAC</b> AGGC                          |
| 16        | 50          | <b>GGGTTGAGTGT</b> TGTTCCATTT <b>GGAACAAGAGTCCACTATTA</b> AG <b>TA</b> AGCT                |
| 17        | 50          | <b>TTTTGGGGT</b> CGAGGTGC <b>TTTT</b> AGCACTAAAT <b>CGGAACCTAAAGC</b> AACT                 |
| 18        | 42          | GCCTCTCCAC <b>CGCGTTGCGCTCTAGA</b> AGGCG <b>TT</b> AAACGAATA                               |
| 19        | 42          | AGGGGACGAC <b>GGCTACAGGGCGCACATTA</b> AT <b>TC</b> AAGAGTTTG                               |
| 20        | 42          | CGAAAGGGCC <b>TACCCGCCGCGCTTAATGCGC</b> ACGAATT <b>TCGA</b>                                |
| 21        | 42          | TGACGCCGGG <b>CCTTTTCGGGGAAATGTGCGCGT</b> ATCCCGTAT                                        |
| 22        | 42          | CGGTCGCCGC <b>ATTTCTTAGACGTCAGGTGGCA</b> AGAGCAACT                                         |
| 23        | 42          | TCAGAATGAC <b>TTTAATGTCATGATAATAATG</b> GTACACTATTC                                        |
| 24        | 42          | ACAGTAAGAG <b>ATGGCGAGAAAGGAAGGAAGAG</b> GATGGCATG                                         |
| 25        | 42          | GCTGCCATAA <b>CGACGGGGAAAGCCGGCGAACG</b> ATTATGCAGT                                        |
| 26        | 42          | AACACTGCGG <b>CGGAGCCCCGATTTAGAGCTT</b> CATGAGTGAT                                         |
| 27        | 42          | GTTGGGAACC <b>GGAGGACCGAAGGAGCTAACCGC</b> GCCTTGATC                                        |
| 28        | 42          | TGTAGCAATG <b>GGGCGATGGCCACTACGTGA</b> ACCACGATGCC                                         |
| 29        | 42          | GCGCAAATA <b>TGGGCGAAAACCGTCTATCAGC</b> AACAACGTT                                          |
| 30        | 42          | ACTACTTACT <b>CAACGTGGACTCCAACGTCAA</b> ATAACTGGCGA                                        |
| 31        | 42          | TTTATTGCTG <b>AGACTGGATGGAGGCGGATAA</b> AGGCTGGCTGG                                        |
| 32        | 42          | CGAGCGAACG <b>AGAAGCCGCATAAGTGTGTAGA</b> AACCAGGTA                                         |
| 33        | 42          | TGGGGCCAGA <b>TCGGCAAAATCCCTTATAAATC</b> ATTGCAGCAC                                        |
| 34        | 42          | CCCGTATCGT <b>ATTTTAACCAATAGGCCGAAATG</b> GTAAGCCCT                                        |
| 35        | 42          | CGACGGGGAG <b>TTTTTTGTTAAATCAGCTCATTG</b> TATCTACA                                         |
| 36        | 42          | ATTGAAAAG <b>GTCTAAATACATTCAAATATGT</b> CTTCAATAAT                                         |
| 37        | 42          | CTCATATATA <b>CTAGACAGATCGTGAGATAG</b> ACCAAGTTTA                                          |
| 38        | 30          | CGATGTGACC <b>TTGTTTTGATACTCTATGTT</b>                                                     |
| 39        | 30          | AAGCATCTTA <b>CAAGCGAAAGGAGCGGGCGC</b>                                                     |
| 40        | 30          | CGAGCGTGAC <b>ACCATCACCTAATCAAGTT</b>                                                      |
| 41        | 30          | CTCGCGGTAT <b>CAAAAGAATAGACCGAGATA</b>                                                     |
| 42        | 30          | TAATTTAAAA <b>GGAGTTTTCGTTC</b> ACTGAG                                                     |
| 43        | 27          | CCTATT <b>TTTT</b> TGTTTATTT <b>TA</b> AGAGT                                               |
| 44        | 26          | AGCACTTTTAAA <b>GCTT</b> GAGAGTTTT <b>C</b>                                                |
| 45        | 26          | TTACATCGAACT <b>GAGT</b> AAAAGATGCT                                                        |
| 46        | 26          | TTCTGTTTTG <b>CTCCG</b> TGTCGCCCT                                                          |
| 47        | 26          | AATCCCTAACG <b>TG</b> ATCTAGGTGAAG                                                         |

**Supplementary Table 8** Staple sequence for the 6HB-based pentagonal DNA origami of 84-bp edge-length. The sequence is represented by colors; unpaired nucleotides with blue, crossovers with orange, the 14-nt seed dsDNA domain with green, and the 4-nt dsDNA domain with red.

| Staple ID | Length (bp) | Staple sequences                                                                            |
|-----------|-------------|---------------------------------------------------------------------------------------------|
| 1         | 59          | GCTAATGACCACC <b>CGCCG</b> CAGCATTGACAGGAG <b>GCCACCCTCAGAGCC</b> AGAACGCGC                 |
| 2         | 59          | TCAGAAAATACATATCATTACCCAAATCATATAAGAACGATCTAAAGTTTTTTTTTGTGTC                               |
| 3         | 59          | AAATCAAGCCAGCTGTATAACGTGCTTTCAGTGAAGAAATACCACATTTTTTTAACTAA                                 |
| 4         | 57          | GATTTTAAAGCTAACTTTCCAGTCGGTTTTTAAACCTGTCGTAAGAATAGTCTTTA                                    |
| 5         | 55          | ATGCTGAAAATCA <b>TTTCTTATCATTCTTTCGGTGAAGCGTCATACAA</b> TCATA                               |
| 6         | 55          | TGCAT <b>GTTGCGTTGCGCTCA</b> CAAGAGTGAGGCGGT <b>CAGTATTAACC</b> GTAAAGG                     |
| 7         | 55          | AGTTGCAGCAAGTTTTTCCACGCTGGTTT <b>CGT</b> GGTTTTTCTTTTTTTCACC                                |
| 8         | 55          | ACAGTTGTAAAGCA <b>CAATTTCA</b> TTTGAGTTAA <b>CAGATAATACATTGG</b> TTTTT                      |
| 9         | 55          | TAGTAAAATGTTTTTTACTGGATAGCGT <b>CCAC</b> CAGACGACGTTTTTTTAAAAAC                             |
| 10        | 55          | CGGATGGCAAAC <b>TGCCTAATTTGCCA</b> GATCAAT <b>ACAGTTGATTCCCAA</b> AGAAC                     |
| 11        | 55          | TTTAATGCGCGATTTTTGATAGCCCTAAAACA <b>AA</b> ACTATCGGTTTTTTTGTGCTG                            |
| 12        | 55          | CCAAAAAAAAGGTTTTCAAAGGAGCCTTT <b>AC</b> GGAGTGAGATTTTTTTAGAAAG                              |
| 13        | 55          | GAAGGCATTTGAGGTCTAAGAACCGGAGGCCA <b>GGATTTGTATCATCGA</b> TTTTTC                             |
| 14        | 55          | GAAAGC <b>CGGGTCGAA</b> CGGGGAGAA <b>TAA</b> CAATAAT <b>ATAGCATTGCTTCTGT</b> TGTTA          |
| 15        | 54          | AAACAGTACATTTTTTATCAATAT <b>ACA</b> ATGACAA <b>TTTTTCCATCGCCCTGAC</b>                       |
| 16        | 53          | TCTGACCTA <b>TTTTT</b> AATGGTT <b>ATA</b> AAGAATA <b>TTTTTTT</b> AACACCGGAATC               |
| 17        | 52          | GGCGTT <b>AGAA</b> TACA <b>CA</b> AATAACGG <b>TTTTTTT</b> TCGCTGATT <b>GT</b> TTCATCT       |
| 18        | 52          | AGAACCGC <b>TTTTTTT</b> CACC <b>CTCAGAGCCACCACCCTCC</b> CTGAT <b>AC</b> CATTTG              |
| 19        | 52          | AAAGAAAC <b>TTTTTTT</b> CACCAGAA <b>GGAGCGGAATTATCT</b> GGCTT <b>GT</b> TTTTCA              |
| 20        | 52          | ATCATGGT <b>TTTTTTT</b> CATAGCT <b>GTTTCTGTGTGAAAGT</b> GCC <b>GA</b> ACCGAG                |
| 21        | 52          | ATTTCAATTACC <b>TTTT</b> GCAAAAGAA <b>GC</b> ACGACCAGT <b>TTTTTTT</b> AATAAAAG              |
| 22        | 52          | CGCCAG <b>GCC</b> CAGC <b>ACC</b> CGAAAGACTTCAAATATCG <b>CTTTTTTT</b> GTTTAAT               |
| 23        | 52          | TAATCATT <b>TTTTTTT</b> GTGAATTACCTTATGCGATTT <b>TTT</b> CTGCG <b>TT</b> TATTT              |
| 24        | 50          | AGGGATAACCTAAA <b>ACA</b> ACGG <b>ACAAAATCACCAGTAC</b> CGGTATACTAAAG                        |
| 25        | 50          | TTAGACT <b>TTTTTT</b> ACAACA <b>ATT</b> AAGTGCCG <b>TTTTTT</b> AGAGGGTTGA <b>ACG</b>        |
| 26        | 50          | GCCAACAACCACCA <b>CG</b> AAAA <b>AGTTGACGCTCAATCGC</b> TGGCCA <b>AT</b> GTTC                |
| 27        | 50          | ATAATCAGGAATTG <b>AC</b> GTCA <b>ATGT</b> CAGATGAAT <b>ATAAC</b> ATTT <b>AT</b> CACCTT      |
| 28        | 50          | TGGCTCTAGAGCTT <b>AC</b> ATATA <b>AG</b> AAA <b>ATTCATATGGT</b> TCCAG <b>ACC</b> AACAG      |
| 29        | 50          | TTCTGCAAATCCA <b>AC</b> GTTCC <b>AC</b> ATAG <b>CCCCCTTATG</b> CTGTCT <b>AG</b> GTCTG       |
| 30        | 50          | TCCGCTCGAACGTG <b>GAT</b> AGTA <b>GAC</b> GGAA <b>TACCCAAAG</b> CATTAG <b>GGT</b> GCCG      |
| 31        | 48          | GGACAT <b>TT</b> CTGAAATG <b>TTTTTTT</b> TATTT <b>ACATTGGCAGTCT</b> AAATAA                  |
| 32        | 48          | CATAA <b>TTTTTT</b> AAAAATCAG <b>GGCCCG</b> AGAT <b>TTTTTT</b> GTTGAGTGTC <b>GCC</b>        |
| 33        | 48          | GATGGCAA <b>TG</b> AGTCA <b>AGGTATTA</b> AA <b>CCAAGGT</b> AGCG <b>CT</b> GATGATACAG        |
| 34        | 48          | CACAACAT <b>AT</b> CACC <b>ACTGA</b> ACAA <b>AGTCA</b> AGAAGG <b>AAA</b> ACCAGGCAA          |
| 35        | 48          | TCAGGACG <b>TT</b> CAAAG <b>CATA</b> AA <b>CAGCCATATGA</b> ATA <b>GA</b> ACGAGTAGAT         |
| 36        | 48          | ATAGGAAC <b>CG</b> GTAG <b>CAAGCGA</b> ACT <b>CCCGA</b> ACTTGA <b>GA</b> ATTGTGT <b>CGA</b> |
| 37        | 48          | TAACA <b>TTTTTT</b> CTGCTCAT <b>TCT</b> CGTTAG <b>TTTTTT</b> CAGAGCGGG <b>ACA</b>           |
| 38        | 48          | GCAA <b>ATTA</b> ACA <b>CTGTTCCAGTTTGGACT</b> GCCC <b>GC</b> AGGAGGCC <b>CAAGCT</b>         |
| 39        | 47          | GCTAG <b>GGT</b> CATTT <b>GACG</b> CAGT <b>ATGTTAGATAGCA</b> GTGGCCCTGAGAG                  |
| 40        | 47          | TATATT <b>TCT</b> CAT <b>TATCACCGGA</b> AC <b>CAGCC</b> AT <b>CCG</b> GCGAATTATC            |
| 41        | 46          | ATCAGAA <b>CAA</b> TTTT <b>AG</b> CCGTT <b>TT</b> CAGTAGCGACAT <b>TTT</b> CAAGTT            |
| 42        | 46          | GTTTTGAAGCC <b>TTTTT</b> AATCAAG <b>TA</b> CGGAAAT <b>TATTTT</b> AAAGGT                     |

|    |    |                                                                                      |
|----|----|--------------------------------------------------------------------------------------|
| 43 | 46 | AATCAAATAA <b>TTTT</b> ACGATTT <b>TT</b> AAAGGTGGCAA <b>TTTT</b> TAAAAG              |
| 44 | 46 | GAGCGTAATA <b>TTTT</b> GAGAGATA <b>ACT</b> TTTTTAAGAAA <b>TTT</b> AGCAGA             |
| 45 | 46 | CTGTTTATCAA <b>TTTT</b> TAGATAAG <b>TC</b> CTCAGAGCCGC <b>TTT</b> CTCAGA             |
| 46 | 46 | TGCAA <b>TTTT</b> <b>GTGCCACGCTGAG</b> AAGAGTCTGTC <b>TTTT</b> CATCAC                |
| 47 | 46 | GGTACC <b>GAC</b> GCCA <b>GGAGTAGA</b> AGAACT <b>CT</b> CGCCA <b>TA</b> ACCGTCTATC   |
| 48 | 46 | <b>ACCGT</b> TGAGGC <b>TTTT</b> <b>TCAGACGATTGGC</b> TTGAT <b>TTCA</b> CCGGAA        |
| 49 | 46 | AACATT <b>AAGAGGC</b> <b>TTTCAACAGTTTCAG</b> ATTGTAT <b>GT</b> AAAACATAGC            |
| 50 | 46 | <b>TGCCG</b> TAATAA <b>TTTTTTA</b> ACGGGG <b>TCAGTGCCTTGAGTT</b> AGCAGC              |
| 51 | 46 | <b>GAATC</b> TGCTCC <b>TTTTTT</b> ACTTAGCC <b>GGAACGAGGCGCAG</b> AAGGTA              |
| 52 | 46 | <b>AAACC</b> ATTAGAT <b>TTTT</b> ATTT <b>CGCAAATGGTCAATAACCTA</b> GAAAAT             |
| 53 | 46 | <b>TAGCG</b> CCATTC <b>TTTT</b> <b>CTGCGCAACTGTTGGGAAGGGCGA</b> TCTTAC               |
| 54 | 46 | GGAAC <b>TTTTTT</b> <b>TACGCCAGAATCCTGAGAAGT</b> AGGATT <b>TG</b> CGTAGA             |
| 55 | 46 | ACCCTC <b>AAT</b> AGGC <b>TATAACCCTCGTTTAA</b> TACTG <b>CC</b> GTCAACCTCA            |
| 56 | 45 | AGGCAGAGG <b>CT</b> TCTGT <b>CCCTGAAAGCGTAAGG</b> AAAA <b>CT</b> ATACAA              |
| 57 | 45 | ACCGTA <b>ATATTTT</b> CATCGTAGGA <b>ATCAT</b> CCATCG <b>AA</b> ACAGTGCC              |
| 58 | 45 | AATATT <b>GTAGTTGCTATTTTGCACCCA</b> GAGGGAG <b>GG</b> ACGGTCAAT                      |
| 59 | 45 | CGAAGC <b>CCCCA</b> AGAATTGAGTT <b>AAGCA</b> ATAGC <b>TA</b> TCGGTGC                 |
| 60 | 45 | CTAACT <b>CACGTGGACAGCAGAAGATAAA</b> ACTTTGT <b>GT</b> TAAAACGAC                     |
| 61 | 45 | GAAAGTATT <b>AT</b> CATTT <b>TTGTTTGGATTATACA</b> ATCCT <b>TC</b> GGTTTA             |
| 62 | 45 | GACCAGGCG <b>CGA</b> ACCG <b>CTTTCGTCA</b> CCAGTAGCGGG <b>ATG</b> GAATCG             |
| 63 | 45 | CACCCGCCG <b>CT</b> TTAAT <b>TTAATAAAACGAA</b> TCGAGGAA <b>GG</b> GCGAAA             |
| 64 | 45 | AAGTTGGGT <b>AG</b> GCTCG <b>AGTAAAGCCTGGGGT</b> GGCGAA <b>AT</b> AAAAAT             |
| 65 | 45 | ATAATTACT <b>AC</b> AGAGC <b>CTCAGAGCCGCCACCA</b> AA <b>CA</b> ACAGAGA               |
| 66 | 44 | GTATAACAT <b>GCGTCA</b> CCAAT <b>GAAAT</b> ACCGC <b>GC</b> GTTGAAAATCT               |
| 67 | 44 | CATAAGGGAA <b>TCATTCA</b> ACCGATT <b>GCT</b> TACAAT <b>TC</b> AGAGGGGGTAA            |
| 68 | 44 | GCCTCTTCGG <b>CAACAATGAAATAG</b> CCCAATA <b>AT</b> GGCTATTAGTC                       |
| 69 | 42 | CCC <b>GAT</b> CTAAAT <b>CAAAAACAGGG</b> AAG <b>CAGA</b> ACT <b>GC</b> ATCAAT        |
| 70 | 42 | TTTT <b>CA</b> TGTAGAA <b>ATAACCTCCG</b> AAATCGCGCAG <b>AT</b> AATTTA                |
| 71 | 42 | ACAAT <b>TT</b> ACCGC <b>CA</b> AGCCAACCTATTACGCC <b>GA</b> TCCAGA                   |
| 72 | 42 | AGCAAG <b>GA</b> ATCAG <b>AA</b> AGTTTCCAATAATTTTT <b>TC</b> ACCCAATA                |
| 73 | 42 | TAGGGC <b>TC</b> CAGT <b>ATAGC</b> ATT <b>GCAACAGA</b> ATACG <b>TA</b> AAAGGT        |
| 74 | 42 | AGACAA <b>AT</b> ACCA <b>CG</b> TACCTTTAAAGAAGTTT <b>GT</b> TTATCC                   |
| 75 | 42 | TAAGACT <b>ATA</b> ACA <b>TG</b> GAACCTACCCTTCACCGC <b>CC</b> CTTAC                  |
| 76 | 42 | AAAGT <b>AA</b> TTTT <b>CGGAATCG</b> CATATTT <b>AT</b> GC <b>GT</b> CTCATG           |
| 77 | 42 | TTTACAT <b>AT</b> CAAG <b>AAT</b> CAAACCCATTACCAGT <b>CA</b> ATGATGA                 |
| 78 | 42 | CCGCCT <b>CC</b> T <b>GAA</b> CAAGAAAA <b>TAATA</b> TAGCCAC <b>CA</b> CAAA <b>CA</b> |
| 79 | 42 | ACATAC <b>ATGTTT</b> AACGT <b>CAAAAATGAAAC</b> AAACG <b>TG</b> TTTAGC                |
| 80 | 42 | AACAA <b>CC</b> GGGAG <b>AC</b> GACCGTGTAGCACTA <b>AA</b> CA <b>CA</b> GTACCT        |
| 81 | 42 | AGCGGG <b>GT</b> TTGCC <b>CC</b> CATAT <b>CAAAATTAC</b> TTGCT <b>TT</b> GATACC       |
| 82 | 42 | CAAGAA <b>CG</b> GTGT <b>ATG</b> ACAGCCCT <b>CATAGT</b> ATT <b>CG</b> GAACAGT        |
| 83 | 42 | GCTTT <b>GA</b> ACGAGA <b>AG</b> ATTCATCAGTT <b>GAT</b> ATTAT <b>ACC</b> TTAT        |
| 84 | 42 | ATTCTT <b>ATA</b> ATT <b>GAA</b> GCCAGTAATAAGAGA <b>ATAG</b> ATCAACAG                |
| 85 | 42 | AATAAA <b>TT</b> AGTT <b>AACTTT</b> GAA <b>TACCAAGTTACAGCT</b> TTCAAA                |
| 86 | 42 | CGAGCA <b>TA</b> ATCAA <b>AAA</b> AGCCAGAAT <b>GG</b> AAAA <b>CTTT</b> TAGGTT        |
| 87 | 42 | GGGTT <b>TA</b> CCCTTT <b>TCCAATCAATAATCGT</b> AGCGT <b>TG</b> TCTCTG                |
| 88 | 42 | AGAGACT <b>ATA</b> ACT <b>AA</b> CAAGA <b>ACCGGA</b> AGCGC <b>AT</b> GCCATC          |
| 89 | 42 | TAAAGC <b>AT</b> AGAGC <b>TG</b> GAAGGG <b>AAGAAA</b> GAAGGT <b>GG</b> CATGAT        |
| 90 | 42 | ACAAT <b>TTTT</b> T <b>GA</b> AT <b>AAGAGCAATAA</b> AGTACCGA <b>CG</b> GCACAG        |
| 91 | 42 | AGAGAG <b>AC</b> CTTAT <b>TGGGCG</b> AGC <b>TGA</b> ACGAAAG <b>GG</b> GGAGCC         |
| 92 | 42 | TAAATC <b>CT</b> TTTT <b>GTGTT</b> AGTAA <b>TGAATA</b> ACAGC <b>TC</b> TGTAAA        |
| 93 | 42 | AGGGTT <b>AT</b> ATTA <b>TAGGTGA</b> ATTTCTT <b>ATTT</b> CTG <b>TT</b> AGGATT        |
| 94 | 42 | TCGTCG <b>CG</b> AACCT <b>AGA</b> ACGTT <b>ATTAATTGA</b> AGGA <b>TA</b> TGGGAT       |
| 95 | 42 | TTTGCT <b>AG</b> CTTT <b>CGTA</b> ATTT <b>CCCTTAGT</b> TCTGA <b>AT</b> TTGAGT        |
| 96 | 42 | TCAGCT <b>TA</b> CAAC <b>TG</b> AGACT <b>CC</b> CAAG <b>AT</b> TAAA <b>GT</b> AATGGA |



|     |    |                                                                                                                                      |
|-----|----|--------------------------------------------------------------------------------------------------------------------------------------|
| 97  | 42 | ATTGCGAATAT <b>T</b> ACTCATCTTGTTAATGCCCC <b>A</b> CTAAAGGA                                                                          |
| 98  | 42 | GCAAGC <b>A</b> CCGGAA <b>A</b> ACCC <b>C</b> AGCGATT <b>A</b> CTAAAA <b>C</b> AACGGG                                                |
| 99  | 42 | TAAAT <b>A</b> CATGAG <b>G</b> TATAGAAGG <b>T</b> TATGCACCA <b>T</b> CGCGAAA                                                         |
| 100 | 42 | ACTTTT <b>T</b> CGTAAT <b>G</b> GG <b>C</b> AAAAGAA <b>T</b> ACATACCA <b>A</b> GTACCATT                                              |
| 101 | 42 | TAAAG <b>A</b> ACATTA <b>A</b> CT <b>G</b> CAG <b>G</b> TC <b>G</b> ACT <b>C</b> GACGT <b>T</b> AGTAAT                               |
| 102 | 42 | CGGAAT <b>A</b> CGGATA <b>T</b> AC <b>G</b> CCAAAAGGA <b>T</b> ATGCTTT <b>T</b> CGCTGA                                               |
| 103 | 42 | TGTAGC <b>A</b> AGGGAG <b>T</b> TGAAT <b>C</b> CCC <b>T</b> CAATACGAG <b>G</b> A <b>T</b> CCTTGA                                     |
| 104 | 42 | GGCTT <b>G</b> CTCCAC <b>A</b> CC <b>G</b> TACT <b>C</b> AG <b>G</b> AAAGAG <b>T</b> ACATAGTA                                        |
| 105 | 42 | AGAGCA <b>A</b> TATTCAT <b>T</b> AAAGG <b>C</b> CGCTTT <b>T</b> CAA <b>A</b> CT <b>A</b> TACCGCC                                     |
| 106 | 42 | TCATA <b>A</b> CACTAT <b>C</b> GG <b>T</b> GAC <b>T</b> TCAT <b>C</b> GGTTT <b>A</b> GC <b>A</b> ACGCC                               |
| 107 | 42 | AACAT <b>C</b> AG <b>A</b> ACCA <b>C</b> CT <b>C</b> CA <b>A</b> CG <b>T</b> CA <b>A</b> AG <b>C</b> CTAA <b>T</b> ATCCCG            |
| 108 | 42 | GCTTTT <b>G</b> CAAA <b>T</b> ATGTTTT <b>A</b> ACCG <b>A</b> ACTGAC <b>T</b> AGCGAGAG                                                |
| 109 | 42 | TGAAT <b>C</b> TAGGG <b>C</b> AA <b>T</b> G <b>C</b> AA <b>C</b> TAAAG <b>T</b> AGCTCA <b>A</b> CTGCTCCT                             |
| 110 | 42 | TTTGAT <b>A</b> TAGAG <b>A</b> G <b>T</b> A <b>A</b> CGAG <b>C</b> G <b>T</b> CTTTTACC <b>A</b> TGGAAGT                              |
| 111 | 42 | GTCAG <b>G</b> AAGAG <b>G</b> T <b>C</b> AATATA <b>A</b> T <b>G</b> CT <b>G</b> T <b>A</b> C <b>G</b> GT <b>G</b> T <b>C</b> GCGCAA  |
| 112 | 42 | ATTAAT <b>T</b> CAGTA <b>A</b> CT <b>A</b> ATAGATTAGAG <b>C</b> GGAAG <b>G</b> TCAA <b>T</b> CA                                      |
| 113 | 42 | ACCGAA <b>C</b> CTTG <b>C</b> T <b>G</b> GTTTTCC <b>A</b> GT <b>C</b> ACTAGAG <b>G</b> AGTGAG                                        |
| 114 | 42 | CCCTGA <b>C</b> GATTT <b>A</b> G <b>T</b> AAG <b>G</b> CT <b>T</b> GC <b>C</b> CT <b>G</b> C <b>G</b> AGCA <b>C</b> G <b>C</b> ATTAA |
| 115 | 42 | TGAAT <b>C</b> GG <b>C</b> AAAA <b>T</b> G <b>T</b> CAG <b>A</b> AG <b>C</b> AAAG <b>C</b> G <b>T</b> AGAA <b>A</b> ACCAG            |
| 116 | 42 | ATTACAG <b>G</b> GATT <b>G</b> CT <b>G</b> GT <b>T</b> CC <b>G</b> AAAT <b>C</b> GG <b>C</b> CAAC <b>G</b> TATGGTT                   |
| 117 | 42 | AACGAG <b>T</b> CGCGTA <b>C</b> CG <b>C</b> GGG <b>G</b> AGAG <b>G</b> CG <b>T</b> TGAT <b>G</b> GA <b>T</b> CAAAA                   |
| 118 | 42 | ATCCT <b>G</b> TGTTTT <b>G</b> CG <b>C</b> CG <b>C</b> TACAG <b>G</b> AG <b>T</b> AA <b>T</b> CAACATT                                |
| 119 | 42 | AGATTA <b>A</b> ACGG <b>A</b> AT <b>G</b> GG <b>C</b> T <b>T</b> GAGAT <b>G</b> GG <b>C</b> TAA <b>T</b> ATTGGG                      |
| 120 | 42 | TATATT <b>T</b> CGCT <b>G</b> CG <b>A</b> CGGG <b>C</b> AACAG <b>C</b> T <b>G</b> ATT <b>G</b> AA <b>A</b> GCGGGC                    |
| 121 | 41 | GATAGT <b>T</b> TCCAG <b>A</b> CC <b>A</b> GTACCAG <b>G</b> CG <b>G</b> ATCGACA <b>A</b> GT <b>A</b> AAA                             |
| 122 | 40 | TATCTTTAGGG <b>A</b> AT <b>C</b> AAT <b>A</b> TCTGG <b>T</b> CTCAA <b>T</b> AACAAA                                                   |
| 123 | 40 | TCGGC <b>A</b> TAGA <b>A</b> CG <b>T</b> AG <b>T</b> GAATTTAT <b>C</b> ATGATTATCAGAT                                                 |
| 124 | 40 | GTCT <b>T</b> GCGCC <b>G</b> AT <b>G</b> TGAGTGAATA <b>A</b> CTTTGC <b>A</b> CC <b>T</b> CGTAT                                       |
| 125 | 40 | TTTT <b>C</b> AGATTAC <b>T</b> G <b>C</b> AAAT <b>G</b> AAAA <b>T</b> CAAAG <b>T</b> GAGGCCA                                         |
| 126 | 40 | GGAATT <b>A</b> GC <b>G</b> TTT <b>T</b> AC <b>G</b> GT <b>A</b> CAGAG <b>G</b> CCAGCAAGCCCA                                         |
| 127 | 40 | TGCAG <b>A</b> CGAGAA <b>A</b> CG <b>C</b> ATA <b>A</b> CCGAT <b>A</b> TAGCG <b>T</b> ATAGCC                                         |
| 128 | 40 | TGTCAC <b>A</b> TACAA <b>A</b> GA <b>A</b> CCAG <b>A</b> CC <b>G</b> GA <b>A</b> CTATTATACCAG                                        |
| 129 | 40 | GAAAC <b>G</b> TGAACA <b>C</b> AAT <b>C</b> AAGTTTTTT <b>G</b> GGCACAATTCCA                                                          |
| 130 | 39 | GAAAT <b>C</b> CTTCT <b>G</b> ACAG <b>A</b> CGAC <b>G</b> ACA <b>A</b> TAGATGTAATTT                                                  |
| 131 | 39 | CTGAGA <b>A</b> TATCAAT <b>A</b> T <b>T</b> TTTT <b>T</b> AATCCTGAT <b>G</b> CGGAAC                                                  |
| 132 | 39 | GAAC <b>A</b> T <b>G</b> CTATTT <b>C</b> G <b>A</b> AC <b>T</b> TTTT <b>T</b> ATTCTGAAACAT                                           |
| 133 | 39 | GAACG <b>A</b> GCATGTACCG <b>T</b> TTTT <b>T</b> AACACTG <b>A</b> GCACC <b>T</b> C                                                   |
| 134 | 39 | CAAAA <b>A</b> ACTTT <b>G</b> AAAGAG <b>G</b> AC <b>A</b> TTTT <b>T</b> GAACGGTGTACA                                                 |
| 135 | 39 | TCGAG <b>C</b> TTGGGAAGA <b>A</b> T <b>T</b> TTTT <b>T</b> AATCTAC <b>G</b> TTCA <b>A</b> CTT                                        |
| 136 | 39 | AGTG <b>A</b> AG <b>T</b> G <b>T</b> AG <b>C</b> GG <b>T</b> C <b>A</b> CG <b>T</b> TTTT <b>T</b> GCGTAAC <b>C</b> ACCA              |
| 137 | 39 | TGAACC <b>A</b> CGAGCCGG <b>A</b> T <b>T</b> TTTT <b>T</b> GCATAAAG <b>T</b> ATTCGTA                                                 |
| 138 | 39 | GGCCAGTGCG <b>A</b> T <b>T</b> G <b>T</b> AG <b>C</b> A <b>A</b> T <b>A</b> CT <b>T</b> ACAGAG <b>G</b> TCCACTA                      |
| 139 | 39 | GTAAT <b>C</b> T <b>G</b> GG <b>C</b> AAAGGGG <b>G</b> AT <b>G</b> TTTT <b>T</b> TGCAAGGCGATT                                        |
| 140 | 34 | GAGTGTACT <b>G</b> TTAG <b>C</b> GT <b>C</b> AG <b>A</b> CTTACC <b>G</b> CACTC                                                       |
| 141 | 34 | AATCCGCG <b>A</b> CT <b>A</b> T <b>C</b> ACCG <b>T</b> CAC <b>C</b> GT <b>T</b> GCGGGAG                                              |
| 142 | 34 | TTAGTTTGA <b>C</b> G <b>C</b> AAAG <b>A</b> CAC <b>C</b> AG <b>T</b> ATTTATCCC                                                       |
| 143 | 34 | AGCGCCATT <b>C</b> G <b>A</b> CA <b>A</b> AG <b>T</b> T <b>A</b> CC <b>G</b> AGGGTAATT                                               |
| 144 | 34 | TAGAAC <b>C</b> TACAT <b>T</b> C <b>T</b> G <b>T</b> T <b>T</b> AG <b>T</b> AT <b>C</b> AAACAAC                                      |
| 145 | 28 | CAGAAA <b>T</b> TTTT <b>T</b> AAAGAA <b>T</b> TA <b>G</b> AAGTA                                                                      |
| 146 | 27 | GATAGCTTAGA <b>T</b> TTTT <b>T</b> TTTT <b>T</b> TAAGACG                                                                             |
| 147 | 27 | GCAGCGAAAG <b>A</b> T <b>T</b> TTTT <b>T</b> T <b>C</b> AGCATCG                                                                      |
| 148 | 27 | AGGGCGATGGC <b>T</b> TTTT <b>T</b> TT <b>C</b> CACTACG                                                                               |
| 149 | 26 | CCGAGTAA <b>A</b> GC <b>C</b> AG <b>C</b> ATTTTT <b>A</b> TGG                                                                        |

|     |    |                         |
|-----|----|-------------------------|
| 150 | 23 | GCTGAACCAGTTGGTATCTAAAA |
| 151 | 21 | AATTTACTCGCAAGTATGTAA   |
| 152 | 21 | CAAAGTACGAAAGACCACTAC   |
| 153 | 21 | TTCATTATTGCTGATTTTTG    |
| 154 | 21 | TCTACTACGAGAAATGACGGG   |

**Supplementary Table 9** Staple sequence for the DX-based hexagonal DNA origami of 84-bp edge-length. The sequence is represented by colors; unpaired nucleotides with blue, crossovers with orange, the 14-nt seed dsDNA domain with green, and the 4-nt dsDNA domain with red.

| Staple ID | Length (bp) | Staple sequences                                           |
|-----------|-------------|------------------------------------------------------------|
| 1         | 58          | GATTTAAACTTCGTGTATTCATTCATTGTCAGTTATCGGACCACATTTTTAATTTAA  |
| 2         | 58          | TAGCAAATACGTATGGGAACCGGAGCTGAACTCGCCTTGATCGTCTCCCTATATT    |
| 3         | 58          | TATTGACGCCGGGTGAGTATTCAACATTTTGAAAAAGGAAGAGTACAAGAGCAACTCG |
| 4         | 58          | GTCACAGAAAAGCGCCTATTTTTATAGGAAAGGGCCTCGTGATAATCTTACGGATGG  |
| 5         | 58          | ACGTTGCGCAAACGCTGAGATAGGTGCCTACGAAATAGACAGATCTATTAAGTGGCGA |
| 6         | 58          | ACACTGCGGCCAAACCTTGCCTCTGAATGGTACGAGCGAACGAACTTACTTCTGACA  |
| 7         | 56          | CTCCCGGTTTGACACCGTCTGGCGGACATCGAAGAGGTTGGTTTTTTTTGTTAAT    |
| 8         | 55          | CTCATTTTTTTATAGGCCGAAATCGGC AAAATGTGGGTTACATTTTTTTGAACTG   |
| 9         | 55          | GGCAAGTGTATCACGCTGCGCGTAACCACTGTAGAAAGTCTTTTTTAATCCT       |
| 10        | 55          | AGAACGTGGATACGTCAAAGGGCGAAAAACCGTCCGCTCATGATTTTTTACAATA    |
| 11        | 55          | TGATAATCTCTCAAATCCCTTAACGTGAGTTTCGTAGTTATCTTTTTTACACGA     |
| 12        | 55          | CTAAATCGGATAAAGGGAGCCCGGATTTAGACTCTCCACCCTTTTTATAGGTT      |
| 13        | 54          | GTTCTGTTTTTCTATGTGGCGCTATTCTCAGATTTTTTATGACTTGGTGAATT      |
| 14        | 54          | ATGCAGTTTTTGTGCTGCCATACGAAGGAGCTATTTTTCCGCTTTTTTAGCGTG     |
| 15        | 54          | ACACCTTTTTTTCGATGCCTGTCTCCCGGCATTTTTACAATTAATATTAAA        |
| 16        | 43          | GATCTTTATTGCTGATTTTTTAAATCTGGAGTGTAAATCAG                  |
| 17        | 43          | ACCTTTTTCGCGCATTTTTTTTTCCTTCCCTTCCACTATTAA                 |
| 18        | 43          | ATCTCAAAGCTTTAATTTTTTCAAATCTGGGCTAGGGCGCT                  |
| 19        | 43          | CGGGTGTAGACCAATTTTTTTTACTCATAAAGATCCTTTT                   |
| 20        | 43          | TGAGTTTCTTAGACGTTTTTTTCAGGTGGCAGCCGTAAGCA                  |
| 21        | 42          | TTTTGCGCAGCGCGTTGCGCTCAGCGAAGGATTCGCCGCA                   |
| 22        | 42          | GCCTTCAAACGGCTACAGGGCGCACATTAATACCTGTATCG                  |
| 23        | 42          | CGCATAAGTGTACCCGCGCGCTTAATGCGCGGTAGGAAGC                   |
| 24        | 42          | GACCGCGTGTGTTTTGTTTTTATACTCTATGTAGTGACGTAA                 |
| 25        | 42          | AAACTAAGAGAGTGAAGAACCAGGGAAAACCACTGTCTATAC                 |
| 26        | 42          | GCTCAACAACAAAGAAAGCGAAAGGAGCGGGCCGCCGGGTG                  |
| 27        | 42          | AAATTACATGCAACGTGGCGAGAAAGGAAGGGGAGAATAAGT                 |
| 28        | 42          | TAAACGAATAGGCTTGACGGGGAAAGCCGGCGGATGTGACCT                 |
| 29        | 42          | GATAATAATGGGGACGACGCAATTCGACGTTAATGTCAT                    |
| 30        | 42          | AATGTGCGCGCAAGTTTTTTGGGGTCCGAGGTTTTTCGGGGA                 |
| 31        | 42          | TGTTTTATTTTTACGTGAACCATCACCTAATAACCCCTATT                  |
| 32        | 42          | TCAAATATGTATCTATCAGGGCGATGGCCACCTAAATACAT                  |
| 33        | 42          | CTTATCCCTTGATAAATGCTTCAATAATATCCGTGTCGCC                   |
| 34        | 42          | ACCCAGAAACGTGTTCCAGTTTGGAAACAAGAGGTTTTTGCTC                |
| 35        | 42          | TAAAAGATGCTGACCGAGATAGGGTTGAGTGTCTGGTGAAAG                 |
| 36        | 42          | TGGGTGCACGACCTTATAAATCAAAGAATAGAAGATCAGT                   |
| 37        | 42          | AGGCGGATAAAGTTTTCCAATGATGAGCACTTGACTGGATGG                 |
| 38        | 42          | CACTTCTGCGCAGAGTTTTTCGCCCGAAGAACGTTGCAGGAC                 |

|    |    |                                                                      |
|----|----|----------------------------------------------------------------------|
| 39 | 42 | CGGCTGGCTG <b>GT</b> CAACAGCGGTAAGAT <b>C</b> TT <b>GT</b> CGGCCCTTC |
| 40 | 42 | TGGGTCTCGC <b>GT</b> TGTAATTCGC <b>TTAAATTTT</b> CCGGTGAGCG          |
| 41 | 42 | AGCACTGGGG <b>CCCCAATCATATGTACCCCGG</b> TATCATTGC                    |
| 42 | 42 | GCCCTCCCGT <b>AT</b> TCGTTCCACTGAGCGT <b>CAGAC</b> AGATGGTAA         |
| 43 | 42 | ACCAAACGAC <b>GG</b> CACAACATGGGGGAT <b>CATGTA</b> TGAAGCCAT         |
| 44 | 42 | GCATTGGTAA <b>CGAGT</b> CAGGCAACTATGGAT <b>GAC</b> ACTGATTAA         |
| 45 | 42 | CTTTAAAAGA <b>AAGT</b> GATAACCAT <b>GTTACTTGGT</b> GCAATCCTA         |
| 46 | 26 | ACGATCGGAGGA <b>CA</b> CCATGAGTGATA                                  |
| 47 | 26 | CATGACAGTAAG <b>AT</b> GAGTACTACCA                                   |
| 48 | 26 | GTCGCCGCATAC <b>AC</b> GGTATTATCCCG                                  |
| 49 | 26 | ACTACTTACTCT <b>AAG</b> CAATGGCAACA                                  |
| 50 | 26 | AAGGATCTAGGT <b>GT</b> TATACTTTAGATT                                 |
| 51 | 26 | CCTAGATTAGAA <b>GC</b> CAGAAAGCATGG                                  |

**Supplementary Table 10** Staple sequence for the 6HB-based hexagonal DNA origami object of 84-bp edge-length. The sequence is represented by colors; unpaired nucleotides with blue, crossovers with orange, and the 14-nt seed dsDNA domain with green.

| Staple ID | Length (bp) | Staple sequences                                                                                         |
|-----------|-------------|----------------------------------------------------------------------------------------------------------|
| 1         | 59          | AGTATAGCCA <b>GA</b> CAGGTAGAAAGATT <b>AACGGA</b> AGCGCGAAACA <b>TTTTTT</b> AGTACAACG                    |
| 2         | 59          | TGGTAATA <b>ACT</b> TTCC <b>AT</b> GACCAACTTT <b>GAAAGAGGACA</b> <b>TTTTTT</b> GATGAACGGT <b>A</b> AATAA |
| 3         | 58          | GCCAGCTTTG <b>CACGACGGCCAGT</b> GCTCATT <b>TTGTT</b> CAGGTT <b>AA</b> CGTGAGGAT <b>AT</b> TGTG           |
| 4         | 58          | CTACGA <b>TTTTTT</b> GGCACCA <b>CT</b> TCGAGGTGA <b>ATTTCTTTTTTT</b> TAACAGCT <b>CG</b> GAA              |
| 5         | 58          | GGAATACCCA <b>CGCGACAGAATCAAG</b> CTATTAT <b>GAGAGACTACCTT</b> AAACAAT <b>AAT</b> GAT                    |
| 6         | 58          | CCAGCAGGCG <b>CCCACCACACCCGC</b> AGTACG <b>GCAATTACCTGAGC</b> ACTCAAT <b>CT</b> GATG                     |
| 7         | 58          | GCAGATTCAC <b>GCAGCTACAATTT</b> AGGTCAG <b>GATAACCTTGCTTCTC</b> CGCACT <b>CC</b> AGT                     |
| 8         | 57          | CTCAGAA <b>AA</b> CCGC <b>CA</b> ACAATGAAATA <b>TTTTTT</b> CAATAGCTAT <b>CACCACG</b> GGTACAGA            |
| 9         | 57          | TTCTGAATA <b>AT</b> GAGTAACATTATCATT <b>TTAA</b> CAAAGAA <b>ACCACAT</b> CAAT <b>AG</b> ATAAAA            |
| 10        | 57          | AAATAAGGC <b>GG</b> AATCGCCAT <b>TTTAA</b> CAAACAT <b>GTAATTTAGATTTAA</b> TATAGTAA                       |
| 11        | 57          | CCTTGAT <b>AG</b> GGTTG <b>AG</b> CGCCAGGGTGG <b>TTTTTT</b> TTTTCTTT <b>CAAGTCCA</b> CTGATAGC            |
| 12        | 57          | GTCTCT <b>GC</b> ATTAA <b>AA</b> ACGTTAATAT <b>TTTTTT</b> TGTTAA <b>ATCCGCAT</b> CGACGTCAA               |
| 13        | 57          | TATATGTAA <b>ACA</b> ACAT <b>GTT</b> CAGCTAAT <b>GCCGCGCCTGTTTATCT</b> TAAC <b>TG</b> GTCTTT             |
| 14        | 57          | CACCAG <b>ACC</b> CTCAG <b>G</b> TAAATCCAGAT <b>TTTTTT</b> CAATATTACC <b>GA</b> ATGG <b>TT</b> CAATAG    |
| 15        | 57          | AGAATCCTT <b>GT</b> TCCTTATCATT <b>CCAAGAATATTA</b> AA <b>CCAAGTAG</b> TAAAT <b>CAG</b> CAAAC            |
| 16        | 57          | CAAAATTA <b>ATCT</b> AAAGCATCAC <b>TTGCTGTCAAATATCAAAC</b> CAAAGAA <b>GAA</b> ATATG                      |
| 17        | 57          | ATCGGGAGA <b>AA</b> ACTAATAGATTAG <b>AGCCGTAGATAATACATT</b> CAGATG <b>AG</b> TTTAGC                      |
| 18        | 56          | GAGATTTA <b>TCGTTGGGAAGAAA</b> AGACTG <b>GATCTTCTGACCTAAG</b> CAGAGGGATAA                                |
| 19        | 55          | ATTAAG <b>TA</b> AGGGC <b>GA</b> ATC <b>TTTGCCCGAT</b> ATCAA <b>ATAGCATT</b> CATTAT <b>GG</b> AGAAT      |
| 20        | 55          | AACTAA <b>AAATTTTCT</b> CAATCATAAGGG <b>AG</b> CAAAA <b>GGTATCGGTTTATCAT</b> TTTGA                       |
| 21        | 55          | GGGAGG <b>TAT</b> CAGAT <b>CATTACCGCGCCCA</b> ATTAC <b>CTTTT</b> GCGGAT <b>GGCT</b> CACCGA               |
| 22        | 55          | ATTAC <b>TC</b> GAGAA <b>AAGGTA</b> AGTAATT <b>CA</b> AGACA <b>ATCCCCCTCAA</b> T <b>GCT</b> CACCC        |
| 23        | 55          | GCGGGC <b>GCC</b> GATT <b>TGGA</b> AGGTTAT <b>CTAAT</b> GCTTT <b>GTGCGAACGAGTAGA</b> AACTC               |
| 24        | 55          | GGAAAC <b>GCG</b> ACTT <b>GCGAGCATGTAGAA</b> TTAAGA <b>CGCCGAAAGACTTCC</b> ATTAG                         |
| 25        | 55          | GATAA <b>ATAAG</b> CAAA <b>ATTTA</b> AGTATC <b>GCACAGACAGCCCTCG</b> AGTAA <b>CA</b> AGCGCA               |
| 26        | 54          | CAATC <b>TTTTTT</b> ATATGTAC <b>CGCTATCAGGT</b> CATT <b>GTTTTTTT</b> CCTGAGAGTCTG                        |
| 27        | 54          | GTTTA <b>TTTTTT</b> TTTGT <b>CACA</b> AA <b>TTAGTCTTTTTTTTT</b> ATGCGCGAA <b>CT</b> ATTA                 |
| 28        | 54          | AAGAA <b>TTTTTT</b> GTGGACT <b>CCAT</b> AACCGTGCA <b>TTTTTTT</b> CTGCCAGT <b>TG</b> CGTA                 |
| 29        | 54          | CCGTT <b>TTTTTT</b> GTAGCAAT <b>ACCAGAATCTGAGAA</b> <b>TTTTTTT</b> GTGTTTTTATAA                          |
| 30        | 54          | CGCCA <b>TTTTTT</b> CATTGACAG <b>GA</b> TTCA <b>AAACTTTTTTT</b> AATAAA <b>TCC</b> T <b>A</b> ATTT        |

|    |    |                                                       |
|----|----|-------------------------------------------------------|
| 31 | 54 | TTCCATTTTTGTTCGGGAAACATAAAGTGAAAGCTTTTTCTGGGGTGCCTA   |
| 32 | 54 | CCAGATTTTTCCACCACCGCCGCCACCCTTTTTAGAGCCACCAGCCGC      |
| 33 | 54 | AGTCATTTTTGAGGGTAAAGCCTTACAGAGAGATTTTTATAACATAAAAA    |
| 34 | 53 | GCATCGGAAAGTGAATACGACGACAATAAATGCTGATAGTTCAGAAAACGAGA |
| 35 | 51 | GAAACCGTATGTTATTCATTACCCAATCAACGTAATTTTCAAAGCTG       |
| 36 | 51 | AAGTGCCTCCGCACTAGGGCTTAATTGATTAAATAGAGGGCTTTGCAAAA    |
| 37 | 51 | AGGGAGTTTTTTAAAGGCCGCTTTTGGGGATCGTTTAAACGCAAATC       |
| 38 | 50 | ACATTAAGGGCGCTGCCAATTCAATACCAAGTTACAGAAATTGAAGAGCTT   |
| 39 | 50 | TGATACAATTGCGAATTTAATTAATACACTAAAACACAGACGGTGTATGG    |
| 40 | 50 | TCAGCATGCGATTTTCATTGAAGAACCGGAGAAAACGACAAACACCAGA     |
| 41 | 50 | CGATGAGGTAACGCATAGTAGATTATTTGCACGTACGTATTAACTCGGTG    |
| 42 | 50 | ACGGGAACCAATGAAGAGGAAGCTGAGAAGAGTCATAATTTAAGCCATT     |
| 43 | 50 | GTAAAATGAAGCCTTAGGTCATTTTTTAATGGAAATAGGAATATAGAAG     |
| 44 | 49 | GTGGTTTTTTTTCCGAAATCGGCAAAGTCCACGCTTTTTGTTTGCC        |
| 45 | 49 | TAAGATTTTTCTCCTTATTACGCAGAGGAAACGCATTTTTAATAAC        |
| 46 | 49 | AGCGATTTTTGTAACAACCCGTCGGCGTCTGGCTTTTTTCCTGTA         |
| 47 | 49 | AATAATTTTTAAGGGACATTCTGGCAATGGATTATTTTTTACATTG        |
| 48 | 48 | CCAATTTTTAGGAACCCATGTACCAATGAAAGTTTTTTAAGA            |
| 49 | 48 | ACCGTTTTTCCAGTAAGCGTCATACATGGCGCTTGCCTAAAAC           |
| 50 | 48 | ACGATTTTTCTAAAGTTTGTCTGTTTTAACGGTTTTGTCTAGT           |
| 51 | 48 | AGTTGTTTTAGATTTAGGAATACCACATTCAAATAGCGAGAATAA         |
| 52 | 48 | GCCTTATAGTTAGAGGGGACGACGCAATTGTAGCCAGAATGCTAGCT       |
| 53 | 47 | ATTGTTTTTCGAAATCCGATCACCCTACTTTTTTCAGGAGG             |
| 54 | 46 | ATACGAGGATCCCATCAAAAATAATTCACTTCTCCAAGTTTTTTG         |
| 55 | 46 | AGAGATCAAAGGCCCTATTATTCTGAAGTAACACTCTGGTGCCGG         |
| 56 | 46 | AAATGAATCCAGAGGCTCAATCGTCTGACAACAGAGGGAGGGAAGG        |
| 57 | 46 | ACAGGAATGGTTGCGAGTTGCAGCAAGCATCCCTGTGTGAGGCGGT        |
| 58 | 45 | GGCCAAAGGCCCAACCGTAATGGGATAAGCTCAATCATGGTC            |
| 59 | 45 | CCTGAGTACGAACAGATAGGGTTGAGTGATTGCGCTTTCCTCG           |
| 60 | 45 | AGCGCGTTTTTCGCTGAAGAGGCTTTGAGGACCGGATAGCAAACG         |
| 61 | 45 | CAGGGAAGCGAATATCAGCGATAGCTTAGACCAATCAATTATCA          |
| 62 | 45 | CGAGCGTCTAATAGCATGAGCGCTAATATCCGATTAGATAGAA           |
| 63 | 45 | GCGCGTACTACGGTACGCTTCTTTGATTAGTAACAGATAAATC           |
| 64 | 45 | CAAGAAAGACAAAAGAGCGTAAGAATACACGCTCATAAACAGCCA         |
| 65 | 45 | ATGAGTGAGCTTAGTTTCGGATTGCGCTGATAATATCTCTAAAG          |
| 66 | 45 | GACTCTAGAGCCGGAAGCCTGTGCGTCCAGCCCCAAATGTGGGAA         |
| 67 | 45 | GAGCAAACAACCCTGTGTTAGAACCCTACCAACGTTATGCGCAAC         |
| 68 | 45 | AAAGGGTGAATACAAAGCCGGTTGATAATCACACCGCTTGAGTTT         |
| 69 | 45 | ACAGGAAGCACTCACTACAACGCTGTGAGTTAAATATGATAT            |
| 70 | 43 | TCAGTGAGGCTAGAGCTAACAAATTTCAATTTGATCCAGCAGCAA         |
| 71 | 42 | ATGACCATAAAAAATCACCGCTTAGTTTTGGTTATATAAC              |
| 72 | 42 | TTCAAAGCGAGACCGGAGTCGCTATTTTTAATTTCCCTT               |
| 73 | 42 | TGCTGTAGCTATGTTTTATGATGAAATTTTCATCAAGAAAA             |
| 74 | 42 | TTCCGAAATGATAACCTATATACAGTTTTGTACCTTTTAC              |
| 75 | 42 | AAGCCTTTATACGCAAGTAATCCTGATTTTTTTGGATTATAC            |
| 76 | 42 | GAAAGTTTTGCGGGGGTAGGTTTGAAATTTTACCGTGTGAT             |
| 77 | 42 | TTTTAGTTAATAAGGGGCTTGAGGTATCATCGCCTCATTTC             |
| 78 | 42 | AAAATCAAGAAAAGGCAAAATCAAAAGAACTGGCGATAAGT             |
| 79 | 42 | ATATATGAGCCGCTAAGAACGCCAGTACACGACATCGAG               |
| 80 | 42 | CGAATTATGGCAAAGCGAACGTGGAAAATCCTGTTAATATCT            |
| 81 | 42 | AAATTGCTTTACAATACGCCACATCAACATTAATAGAAGT              |
| 82 | 42 | CCAGCGATTACTTAACTTTCAACCGGAATAGGTGTCGACCTG            |
| 83 | 42 | CCAACGCAATCATAACGATAAAAACCAACTAATGGGCGGAT             |

|     |    |                                                                                                                    |
|-----|----|--------------------------------------------------------------------------------------------------------------------|
| 84  | 42 | AAAATT <b>C</b> AGCAAG <b>A</b> TCCCTCAGATCCCAATCCAA <b>AA</b> GCCCAA                                              |
| 85  | 42 | ACACCG <b>G</b> TCAACA <b>G</b> CT <b>C</b> AGA <b>A</b> CC <b>G</b> CC <b>A</b> AGTACC <b>AC</b> AGATAC           |
| 86  | 42 | CCTAAA <b>A</b> CTTGCT <b>G</b> AGCCGCCACGAGCGGGAGCT <b>AC</b> TCAAAC                                              |
| 87  | 42 | AGGGCG <b>A</b> GTATT <b>G</b> GGCAGGTCATCCTGTGTGAA <b>AG</b> AGAGGC                                               |
| 88  | 42 | ACTAT <b>C</b> AGTATCATATCCTGATTAT <b>C</b> ATATATTTAGCAAC                                                         |
| 89  | 42 | CTCCAT <b>G</b> TATAC <b>CA</b> CAACATTACCAAAAAA <b>AG</b> GTGACCC                                                 |
| 90  | 42 | TTTGCC <b>CA</b> AAT <b>G</b> CA <b>T</b> TA <b>AA</b> CGGGT <b>AA</b> ACATAGG <b>CA</b> GAAACG                    |
| 91  | 42 | CGGGCC <b>T</b> TGTGCT <b>G</b> T <b>CC</b> AGT <b>C</b> AC <b>G</b> AC <b>G</b> AAGGT <b>G</b> AATAAAG            |
| 92  | 42 | AAGGAT <b>T</b> GAGCCA <b>CC</b> GTTATACAA <b>AT</b> CCCTGTT <b>TA</b> TAACCC                                      |
| 93  | 42 | ACCCT <b>AA</b> GGATT <b>AA</b> ATT <b>AC</b> GAGGCATAG <b>TA</b> AG <b>AT</b> CAAGAG                              |
| 94  | 42 | TCGTTT <b>AC</b> AAAAG <b>GG</b> CGGGGTTT <b>G</b> CT <b>CC</b> CCT <b>CA</b> GTATAAAG                             |
| 95  | 42 | ATAAC <b>G</b> CCAGAC <b>G</b> ATT <b>ACT</b> AGAAAA <b>AG</b> TACC <b>GA</b> ACCGCC                               |
| 96  | 42 | GAGCCA <b>G</b> TAATTT <b>CA</b> TAGCGT <b>CCA</b> AT <b>AC</b> GT <b>C</b> AGG <b>AG</b> GTTTAA                   |
| 97  | 42 | TTTCAA <b>CG</b> TAAAT <b>T</b> AGAATATA <b>AA</b> GT <b>AC</b> CTTTTT <b>CT</b> CGTCAT                            |
| 98  | 42 | ACGAGT <b>AT</b> TTAAT <b>CG</b> GCT <b>C</b> ATTAT <b>AC</b> CATGCGGA <b>AA</b> AATATA                            |
| 99  | 42 | TGTTGG <b>G</b> T <b>AC</b> GGT <b>AA</b> TCGT <b>AAA</b> CT <b>AG</b> T <b>C</b> AGGC <b>TT</b> AATTTT            |
| 100 | 42 | AGGGGG <b>ACT</b> TCGC <b>T</b> CA <b>AT</b> TC <b>G</b> ACA <b>ACT</b> AA <b>AC</b> AG <b>AC</b> ATCAAT           |
| 101 | 42 | CCAGGC <b>G</b> ATACGT <b>AG</b> ATAGTT <b>G</b> CG <b>CC</b> GATCTTTT <b>CA</b> GCCCTT                            |
| 102 | 42 | TTTAAG <b>AA</b> TATA <b>AA</b> AT <b>GG</b> CT <b>G</b> AC <b>CT</b> TCATAGTTT <b>CA</b> ACAACC                   |
| 103 | 42 | ATGAGG <b>CA</b> AAGAG <b>T</b> ATA <b>AA</b> GGT <b>GG</b> CAA <b>CA</b> AAGTA <b>AA</b> TTAGCG                   |
| 104 | 42 | ATCGCC <b>CCCC</b> CT <b>TG</b> CAGATAG <b>CC</b> GA <b>CT</b> ACATA <b>CA</b> ATCTTG                              |
| 105 | 42 | TAGAAAA <b>AA</b> AGTT <b>AA</b> TTTT <b>CG</b> GT <b>C</b> ATAG <b>CG</b> CAT <b>AC</b> TTTTTC                    |
| 106 | 42 | ACAAGA <b>ACT</b> AAAG <b>AA</b> CCGATAT <b>AT</b> TC <b>GG</b> CATCGG <b>CC</b> CAGAAG                            |
| 107 | 42 | CCTGA <b>ACT</b> AGGTC <b>TAG</b> T <b>C</b> AGA <b>AG</b> CAA <b>AG</b> ATCAGT <b>AC</b> AGTAGC                   |
| 108 | 42 | ACCATT <b>AT</b> AGAG <b>C</b> ATA <b>AT</b> AT <b>CC</b> CAT <b>C</b> ATAGT <b>AC</b> AT <b>CA</b> AAA            |
| 109 | 42 | TGGGA <b>AT</b> CCATT <b>G</b> ATAG <b>C</b> AG <b>C</b> CGT <b>AC</b> GGATT <b>GA</b> TTTATC                      |
| 110 | 42 | CGAGGC <b>G</b> TCAT <b>CT</b> CC <b>AAA</b> AG <b>GG</b> AG <b>CT</b> AATA <b>TA</b> AGGAAC                       |
| 111 | 42 | CCGT <b>CA</b> CT <b>GA</b> AT <b>TA</b> ACT <b>GA</b> AC <b>ACC</b> CT <b>GA</b> AGGT <b>GA</b> TAATCG            |
| 112 | 42 | TGCCTATAGTACA <b>AA</b> GC <b>C</b> AG <b>CT</b> TT <b>CC</b> GG <b>AAA</b> AG <b>CA</b> TTTTTG                    |
| 113 | 42 | TAATA <b>AGA</b> TATGG <b>T</b> AG <b>ACA</b> ATATTTTT <b>G</b> CAGCC <b>AC</b> GCCACC                             |
| 114 | 42 | CGCCAA <b>AT</b> GAGTT <b>ATA</b> AGAA <b>AC</b> GATTTTT <b>AC</b> AAA <b>AT</b> GGAAAT                            |
| 115 | 42 | ACCTAC <b>AG</b> AC <b>CT</b> G <b>AG</b> GG <b>G</b> CAG <b>ATT</b> CA <b>AC</b> AGAGAG <b>AA</b> CGTCAA          |
| 116 | 42 | CCCTT <b>CT</b> TTTT <b>GA</b> CC <b>TA</b> ATTT <b>G</b> CCAGTT <b>GT</b> TT <b>AT</b> AACCCA                     |
| 117 | 42 | AACAAG <b>CT</b> GAGT <b>GA</b> ATTAGAGAGT <b>AC</b> CTT <b>GC</b> AC <b>CA</b> GGCGTT                             |
| 118 | 42 | TTAGCG <b>AC</b> GGTATTTTT <b>AT</b> TTT <b>C</b> AT <b>GC</b> AGT <b>AC</b> AC <b>TC</b> CTTT                     |
| 119 | 42 | GCTTAT <b>CA</b> CT <b>CC</b> CGATTAGTT <b>G</b> CTATTT <b>TA</b> ATT <b>GT</b> AAATCA                             |
| 120 | 42 | CATCAC <b>GA</b> AC <b>C</b> ACGCTGAGAGAG <b>CA</b> AG <b>CA</b> ATTGAGTCTGTC                                      |
| 121 | 42 | CGTCAC <b>CT</b> CG <b>AA</b> AG <b>G</b> AGACAGT <b>CA</b> AA <b>T</b> GGT <b>AG</b> CT <b>CC</b> AAAA            |
| 122 | 42 | TATCGG <b>CC</b> ATCG <b>CC</b> AGTT <b>GG</b> AA <b>CA</b> AG <b>CC</b> AGT <b>AG</b> AACCAC                      |
| 123 | 42 | GAAGAT <b>CG</b> ATTGT <b>AT</b> TAAT <b>G</b> CC <b>GG</b> AGAG <b>CA</b> CCAT <b>CT</b> GCCCC                    |
| 124 | 42 | ATACCG <b>AA</b> GAAG <b>AA</b> ACAGGAG <b>GC</b> GATATA <b>AC</b> GT <b>CT</b> TCACC                              |
| 125 | 42 | GCCTGG <b>CT</b> AG <b>CC</b> G <b>AC</b> CAGCAG <b>AA</b> GATA <b>AA</b> ATA <b>AC</b> AA <b>TT</b> TTAG          |
| 126 | 42 | AAAAG <b>AA</b> CTGAG <b>AT</b> TT <b>G</b> AC <b>G</b> AG <b>C</b> AG <b>TT</b> AAAG <b>GT</b> CACTTG             |
| 127 | 42 | GGTCAGTTT <b>C</b> ATT <b>TT</b> GT <b>CT</b> G <b>GA</b> AGTTT <b>CC</b> GC <b>TA</b> AGAGAAAG                    |
| 128 | 42 | GAAGGG <b>AA</b> AG <b>CC</b> GT <b>CA</b> ACAGTT <b>G</b> AAA <b>GA</b> AATCG <b>CA</b> TAACAG                    |
| 129 | 42 | GACGGG <b>GA</b> AAAG <b>CT</b> AG <b>CG</b> GT <b>C</b> AG <b>CT</b> GATT <b>CC</b> AG <b>AG</b> AGG              |
| 130 | 42 | GGAG <b>CC</b> CT <b>ATT</b> G <b>CG</b> TT <b>G</b> CG <b>CT</b> CA <b>CT</b> G <b>CT</b> CG <b>AA</b> CTTAGGAG   |
| 131 | 42 | GGTTT <b>G</b> CA <b>AA</b> ACC <b>GT</b> T <b>GG</b> T <b>G</b> TAGAT <b>GG</b> GG <b>C</b> ATTA <b>AC</b> GATTGG |
| 132 | 42 | GGGCG <b>AT</b> GCGCG <b>G</b> GT <b>G</b> TTAT <b>CC</b> G <b>CT</b> CA <b>AA</b> ATT <b>CG</b> TTTTTAA           |
| 133 | 42 | CCAAT <b>AG</b> CGGATT <b>GT</b> AC <b>T</b> G <b>AA</b> CCAT <b>C</b> ATGCATT <b>AA</b> CA <b>CA</b> AC           |
| 134 | 42 | CAAAC <b>G</b> GAAC <b>GC</b> CG <b>GT</b> AC <b>CG</b> AG <b>CT</b> G <b>CA</b> AAT <b>CC</b> ATGAATC             |
| 135 | 42 | ATTAG <b>AC</b> GTAGAT <b>T</b> GG <b>GC</b> G <b>G</b> AG <b>CT</b> G <b>AA</b> TT <b>G</b> TAA <b>AT</b> GGCGAA  |
| 136 | 41 | CAAAG <b>ACT</b> TACC <b>G</b> AA <b>TA</b> AT <b>CA</b> AAAT <b>CA</b> CTGAT <b>AC</b> CA <b>T</b> GCCA           |
| 137 | 40 | ATCATCATATT <b>GC</b> ACC <b>CT</b> CATTT <b>CA</b> AG <b>ACT</b> CA <b>AT</b> GCAA                                |

|     |    |                                                                       |
|-----|----|-----------------------------------------------------------------------|
| 138 | 40 | TGCCTG <b>AGA</b> ACCCT <b>TGATGATGGCAATTCC</b> AGAAG <b>GCA</b> AAGC |
| 139 | 40 | TTGAAAATCTTT <b>TTTTCAGCGGAGTGACT</b> TAAAC <b>AGCCGGAA</b>           |
| 140 | 40 | CAATCG <b>CTGTCCAGAAGGCTTGCCTGAT</b> AGCGAAAGACA                      |
| 141 | 40 | GAAAG <b>AGACCGAACGACGTTAGTAAATGGG</b> AGGAGTGTAC                     |
| 142 | 39 | AATGTT <b>TATCTACGTTATTTTTTTT</b> TAAAAC <b>GAACTCATC</b>             |
| 143 | 39 | CTCATT <b>CCGAGGGTAGCTTTTTTT</b> AACGGCT <b>ACGGCTTGC</b>             |
| 144 | 39 | TATTATTTAG <b>CTTGCAACAGGAAAAGTGGCACT</b> TACCAG                      |
| 145 | 39 | TTAGAATCAC <b>AGACGGGCAACAGCTG</b> TTGTT <b>CATTA</b> AAA             |
| 146 | 39 | ATAGCTGTTG <b>AATTTTTGTTAAATCG</b> GCAC <b>GTCTATCA</b>               |
| 147 | 39 | TCAACCGTTG <b>AAGTGCCCGTATAAAA</b> GCATT <b>CGCCTCAG</b>              |
| 148 | 38 | TAAATATTGAC <b>TTTTTTTGGAAATTATT</b> CATT <b>AAACAA</b>               |
| 149 | 38 | CAGTATTAACA <b>TTTTTTTCCGCCTGCAACAGTGA</b> TTAA                       |
| 150 | 38 | GGGTCGAGGTG <b>TTTTTTTCCGTAAAGCACTAAAC</b> CGCT                       |
| 151 | 38 | AAACCAGGCAA <b>TTTTTTTAGCGCCATT</b> CGCC <b>ATCATGT</b>               |
| 152 | 36 | ACCCTG <b>ATT</b> TGCCTTT <b>TTTTTTT</b> GCGTCAGACTGT                 |
| 153 | 36 | TCCAAC <b>ATCCTGAATCTTTTTTTT</b> TACCAACGCTAA                         |
| 154 | 36 | CAACTA <b>AGCGCTTAATGTTTTTTT</b> CGCCGCTACAGG                         |
| 155 | 36 | TATATT <b>CAAGCTTGCATTTTTTT</b> TGCCTGCAGGTC                          |
| 156 | 36 | ATTTTT <b>AGTAATGTGTATTTTTTT</b> GGTAAAGATTCA                         |
| 157 | 32 | ATGAAAA <b>TTACATTTAATTGCTGAATATAA</b>                                |
| 158 | 30 | GCTGTC <b>TAAAACATGCGTTTTAATTCGAGC</b>                                |
| 159 | 30 | CACTAA <b>ACAATAATGACCATTAGATACAT</b>                                 |
| 160 | 30 | AAAAGT <b>TTGGAAGGAATACTTTTGCGGGAG</b>                                |
| 161 | 29 | TTTAGT <b>AGTCGAGAGGGTTTTTT</b> TGATATA                               |
| 162 | 23 | GATTTT <b>GGAATAGATTTTTTCACG</b>                                      |
| 163 | 21 | AAATAT <b>TAAGAACTATT</b> TGTGA                                       |
| 164 | 21 | AAGATT <b>AACCATCGCA</b> AGGCC                                        |
| 165 | 21 | TGATA <b>AGAAATCAAG</b> ACTTGC                                        |
| 166 | 21 | TTGATT <b>CGCAAGTGGAA</b> AGGA                                        |
| 167 | 21 | TCTACT <b>AAGGGTTCA</b> AGGCG                                         |
| 168 | 21 | GGCT <b>GGGGATAGAGCGGA</b> ATT                                        |

**Supplementary Table 11** Staple sequence for the 6HB-based hexagonal DNA origami of 63-bp edge-length. The sequence is represented by colors; unpaired nucleotides with blue, crossovers with orange, the 14-nt seed dsDNA domain with green, and the 4-nt dsDNA domain with red.

| Staple ID | Length (bp) | Staple sequences                                                                       |
|-----------|-------------|----------------------------------------------------------------------------------------|
| 1         | 60          | TTTTGC <b>TAAGAGA</b> <b>AAGTTTATTTTGTCAA</b> ACAGC <b>CACTCCAACAGGTCAGG</b> GATAAGTGC |
| 2         | 60          | TTTCAG <b>GACAGAAAGTATAAAGCCAACGC</b> GCGCC <b>CTGACCATTAGATACA</b> ATGAATATAC         |
| 3         | 60          | AATGC <b>AGAGATTTACATGATTAAGACTCAG</b> GCGCA <b>TGAAGCAAAGCGGATG</b> CAAAAAGGAAT       |
| 4         | 60          | AGTTTT <b>CAGGACTAATGGTTAATTTT</b> CATGACAA <b>GCTAAAACACTCATC</b> AGAAATACGTA         |
| 5         | 60          | AAATCA <b>CAGCCATACGGAAATTATTCAA</b> AATCA <b>ATAGCTCAACATGTTTT</b> TACCATTAG          |
| 6         | 60          | TTTTT <b>GAGTAAGAAGAGAATATAAAGTAA</b> ATCGG <b>CTAGCATTGCCCCGAG</b> CTTTAATGC          |
| 7         | 59          | GTCAGATATCTGGT <b>CTCAAAA</b> <b>TGTAGGGCTTAATTGT</b> TTCAT <b>CAAATGGTCAATAACCT</b>   |
| 8         | 59          | AACGCCAGACGGT <b>CAGGTAGAACGCAGTATGTTAGCA</b> GAATA <b>AAAAAGATTAAGAGGAA</b>           |
| 9         | 59          | ATTAGTGAGGCCGAT <b>TGAACCC</b> <b>TAAGGTAAAGTAAT</b> TAGCATG <b>TGCTTGACGGGGAAAGC</b>  |
| 10        | 59          | CAGGCCAACC <b>CGCTCATTAAAGTAGAAAATTCATATT</b> AATTT <b>GAGAGTACCTTTAATTG</b>           |
| 11        | 58          | ATCATAGGTG <b>ACCAATGAAACCATCT</b> AGAGCT <b>TCAGCTACAATTTTAC</b> CGATT <b>GCTTTT</b>  |
| 12        | 58          | TGAGTAGAAC <b>AAAACATCGCCATTAA</b> AGGT <b>GGAAACGGGTATTAAG</b> GCAGAT <b>CGGC</b>     |

|    |    |                                                              |
|----|----|--------------------------------------------------------------|
| 13 | 58 | GGAACGAGGCTGCATCACATAAAAAACAGGGACTTATTAAAGATTCATCAGTTGATACAT |
| 14 | 58 | CGTATTAATGCATCGGGAGAAACACCAATTAGAAGGCTTATCCGATCATATACGTT     |
| 15 | 58 | ATCCTCATTTTAAAGTATAGCCCGGGCTTCAATAAGAAACGATTAAAAGAAGAAAG     |
| 16 | 58 | GTAACAATTTTTAGCTGCTCATTAGTGCAGCAACACTATCATACAGGTCTCACCTG     |
| 17 | 57 | CCATCGGAATAATGACTGGATAAGCGGGCGTAGGGCTTTTTTGTCTGGCAAGTGT      |
| 18 | 57 | CTTTACAGAGA AACGTAGAAAATACATACAGGTGGCAACATATTTTGTGTGCGTTTT   |
| 19 | 57 | TTCCAGAGCCGGTTTACCAGCGCAAAGAAGGGCGACATTCAATCCTGAATTTTTCG     |
| 20 | 57 | CCTCCCGACTCACCGGAATCATAATTACTAAAGCCTGTTTAGTGTATTCTATAACAG    |
| 21 | 57 | CCGTTTTTATAGAATCGCCATATTTAACACAACATGTAATTTACCAAGTAGGGCGCG    |
| 22 | 57 | TCGTGAAAGACAGCTTTTTTATCGGAACGAGGGTAAATGAATTTTTTTTGTATG       |
| 23 | 57 | GATAACCCACCGAACAAGTTACCAGAAACCGAGGAAACGCATCAGAGGCATAAAT      |
| 24 | 56 | GCCCAATATTTTTTGAACCCATGTACCGTATAATTAATTTTCTTTTTTTAGAA        |
| 25 | 56 | AGTTTTCGTTTTTTTACCAGTACAACTACCCTAACAATAATTTTTTGTATTAG        |
| 26 | 56 | CGGGTAACGTTAGTAGCAACGGTATTGTGAATTACCTTATGCGTTTTTTATTTTA      |
| 27 | 56 | ACAACTTTTTAAAGGAATTGCCACGCAACGCGCCTGCAATAGCTATCTACAACAA      |
| 28 | 56 | GTAGCATTTTTTTTTACAGACAGCCCTCACGAGGCCACCGAGTTTTTTTAAAGAG      |
| 29 | 55 | AAACTAGCATTTTCGAGCCAATTCCAACATCAATTCTACTAAGCCCTAGACAATA      |
| 30 | 55 | AGCTTGGAGTAGTAAATTGGTACCCAACGAAAGAGGCAAAAGAAGGCATGAGGA       |
| 31 | 55 | GCTTGCCGAATACCCAAAAACTGAATTACCCTGACTATTAGTAAGATTCAACT        |
| 32 | 55 | AGAATGACGCAAGACACCAATCCAAGCGAACAGACCGGTTGATAAAGCGGGG         |
| 33 | 55 | GACTACAGGGAGGGAAGGTATTGACCTAATTGCTGAATATAACGTACAGCCAGCA      |
| 34 | 55 | GCCCGAGCGTTATACAAATTCAGATATTGCGAACGAGTAGACCTTTTACGTAGAT      |
| 35 | 54 | AGAAAATAAGTTTTTTTTTTACGGGGTCAGGAACGCGAGATTTTTTTAACTTT        |
| 36 | 54 | TTCAATCATCATATTTTTTTCTGATTATCTACATTTTGATTTTTTTGCTCAA         |
| 37 | 54 | AAGGGTTTTTAAACCGAATCCGCGACCTGCTCCATTTTTTTTGTACTTAGCC         |
| 38 | 53 | TACGAGGCAATAGTATAGACGGGAGAATTGAACGGGAATACCAATAAG             |
| 39 | 53 | CGTCGAGAGGGAAGCAATATTTATTTTCCCGGAATAGGATTAGGAAAAGCC          |
| 40 | 53 | CAAGGCCGGAATGCTGGATTAGTTGCTATTAATATTGTGGGAATTACTGAGA         |
| 41 | 53 | AGTAACAGTATTTAGTAAATAGCAAGCAATCTTACCATAAAGAAATTCCTTT         |
| 42 | 53 | GCGAACTGATATAGTAGTGTCTTTTCTTATCGTAATAATACGTGGCAGAATC         |
| 43 | 53 | ATGCCACTACGAATACAACCCGGATATTATGCTTGAGAAGACTTTTTTTATC         |
| 44 | 52 | TTCAGGGATAGAACCACCCTTTTTGAGCCGCCGCTACTGGTCTGGCTC             |
| 45 | 52 | GTATCGGTCCCAACCTAAAACCAAAATAGCGAGTTTTTTTAGGCTTTTGCAA         |
| 46 | 51 | AGACTTTAACATGTTTTGAAATACCGACGTTGATTTTTTTTAAATAAG             |
| 47 | 51 | TATCTTCATCAATAAAAAAGCTCATGGCCATCACCCGCTGCAAACGCCT            |
| 48 | 51 | TCAGAGCGTGCCCGCAAATCCAATCGCAGAAAACACGCGTTTTTCATAGCAA         |
| 49 | 51 | AAGCCTTTAAAGGTGAATAAGAATAAATGCGGGATGCAACTAAAGTACGG           |
| 50 | 51 | ATAACATGTTACGCTAAAGTCCTAAGGGAAGAAAGCGAAAGGGCTATCAAC          |
| 51 | 51 | AAGAGTCGTTATATGCTATTTTCGAACTATTATTTTTTTCTGAAACA              |
| 52 | 51 | ATCAAAATTTTTTTTACCAGAACAGAGCCACCACCGGATTAGCCAGTTA            |
| 53 | 51 | TTGATTACAATATATACTTCTGAATAATGGAAGGGTTTTTTTTTAGAACC           |
| 54 | 51 | ATTACATTTTTTTTAAACAATTTCAATTTGAATTACCTTAAATAGTTTTTG          |
| 55 | 51 | AATAGATATGCAGATAACCGATATTTTTTTTATTCGGTCGCTGAGGAAGGA          |
| 56 | 51 | TGCTGAACTTTTTTTCTCAAATATCAAACCTCAATCATTTTCGCTAGGAA           |
| 57 | 51 | GAGGTTTTTTTTGAATTTCTTAAACAAGTCCAAAAGGATTTTTCTTTAATT          |
| 58 | 51 | TCCTCGTTTTTTTTAGAATCAGAGCGGGAGCTAAACAATTTAGAAAGAAACC         |
| 59 | 51 | TTTTATATTACATGGGATCGTCACCCTTTGCTAATTAATGCGCTAGTTAG           |
| 60 | 51 | AAATCGTAATTTCAACCACCAGAAGGAGTCAATAGTTCATTTCAAACACTG          |
| 61 | 51 | CGTAACGATTTTTTTTCTAAAGTTTTGTCGCTTTTCTTTGACCATCAAGA           |
| 62 | 51 | GAATAGACTTGCAAGCCAGTAATAAAAGGGACATTCTTTTTTTGGCCAAC           |
| 63 | 49 | CTTGCTTTTTTTGGTAATATCCAGAAGTAATAACATTTTTTACTTGCC             |
| 64 | 49 | ATTAATTTTTTTTAAAAGTTTGAGACAAACAATTTTTTGACAAC                 |
| 65 | 49 | TAACCTTTTTTTTCCGGCTTAGGTTGGATAGTGAATTTTTTATCAAA              |
| 66 | 49 | ATTATACCTTTTTAAAGCGCAAACAGAGCCACCTTTTTTTCCCTCATT             |

|     |    |                                                                                                                                                                                                |
|-----|----|------------------------------------------------------------------------------------------------------------------------------------------------------------------------------------------------|
| 67  | 49 | CCACCC <b>T</b> CAAAG <b>T</b> AGCGCATAGGCTG <b>T</b> TTTT <b>T</b> CTGACCT <b>T</b> CCCAGCG                                                                                                   |
| 68  | 49 | CGCAG <b>T</b> TTTT <b>T</b> TCT <b>T</b> GA <b>T</b> T <b>T</b> ACCG <b>A</b> TATTCACAA <b>T</b> TTTT <b>T</b> CAAATAA                                                                        |
| 69  | 47 | CAAAA <b>T</b> ACCCTCGTTTT <b>T</b> TTTT <b>T</b> CCAG <b>A</b> CGACG <b>A</b> TAAA <b>A</b> ATCAAC                                                                                            |
| 70  | 46 | AACAA <b>G</b> ATAATA <b>A</b> CTGACGAG <b>A</b> TTTT <b>T</b> TTACACCAGAA <b>C</b> TTTT <b>C</b>                                                                                              |
| 71  | 46 | AATTGT <b>G</b> TACC <b>G</b> CG <b>A</b> CG <b>A</b> T <b>T</b> GGC <b>T</b> T <b>G</b> TCCAG <b>T</b> CGTTAATAAAA                                                                            |
| 72  | 45 | GGAGGTTTA <b>G</b> TCGAA <b>T</b> GA <b>C</b> CA <b>A</b> CTTT <b>G</b> AAAA <b>A</b> ATCT <b>A</b> AAGCGTC                                                                                    |
| 73  | 45 | GCGACAGAA <b>T</b> CCAT <b>C</b> TA <b>G</b> A <b>A</b> CC <b>G</b> CC <b>A</b> CC <b>T</b> GCCCC <b>T</b> A <b>A</b> CTATA                                                                    |
| 74  | 45 | TTGCGC <b>C</b> GAAA <b>T</b> CGGG <b>G</b> T <b>A</b> T <b>A</b> GT <b>A</b> AAA <b>A</b> ATCG <b>T</b> CG <b>C</b> AAGAAACA                                                                  |
| 75  | 45 | TTGAATACC <b>A</b> GAAAA <b>C</b> AT <b>A</b> T <b>G</b> T <b>G</b> AG <b>T</b> GA <b>A</b> TTTT <b>A</b> AT <b>G</b> ATCATT <b>T</b>                                                          |
| 76  | 45 | CAGAAGATA <b>A</b> CTAA <b>G</b> CGAA <b>A</b> GG <b>A</b> ATT <b>G</b> AG <b>G</b> TGGAT <b>T</b> ACCGCCA                                                                                     |
| 77  | 45 | AGCGGTCAC <b>G</b> GTATA <b>A</b> AC <b>G</b> GT <b>A</b> CG <b>C</b> AG <b>A</b> T <b>C</b> ACAC <b>G</b> GGAG <b>T</b> TA                                                                    |
| 78  | 45 | AAGAAGTTT <b>T</b> A <b>T</b> CCC <b>C</b> G <b>A</b> GT <b>A</b> AG <b>C</b> CA <b>A</b> TT <b>T</b> AAG <b>A</b> ACCGAT <b>A</b> G                                                           |
| 79  | 42 | <b>G</b> CC <b>G</b> AA <b>A</b> AGAAA <b>A</b> T <b>A</b> CA <b>C</b> GTCAA <b>A</b> TTTT <b>T</b> AAA <b>A</b> ATAGCAG <b>C</b>                                                              |
| 80  | 42 | <b>C</b> T <b>C</b> TTTT <b>G</b> AAG <b>G</b> T <b>C</b> ATT <b>C</b> T <b>A</b> CCA <b>A</b> TTTT <b>T</b> AACGAGCG <b>T</b> C <b>T</b>                                                      |
| 81  | 42 | <b>T</b> G <b>T</b> CT <b>G</b> GA <b>A</b> GT <b>T</b> CC <b>A</b> T <b>A</b> GAAC <b>G</b> CG <b>T</b> TTTT <b>T</b> GTTTTAGCG <b>A</b> A                                                    |
| 82  | 42 | <b>G</b> TT <b>T</b> AG <b>C</b> T <b>A</b> T <b>T</b> C <b>A</b> TT <b>T</b> G <b>C</b> CG <b>A</b> CT <b>A</b> TTTT <b>T</b> GAACAAG <b>C</b> AAG                                            |
| 83  | 42 | <b>C</b> GG <b>C</b> GA <b>A</b> CG <b>T</b> AG <b>A</b> AG <b>G</b> GA <b>A</b> CA <b>A</b> GA <b>A</b> TTTT <b>T</b> AATATCC <b>C</b> AT <b>C</b>                                            |
| 84  | 42 | <b>A</b> GT <b>T</b> C <b>A</b> GA <b>A</b> GA <b>A</b> T <b>G</b> A <b>C</b> G <b>T</b> A <b>A</b> T <b>T</b> G <b>A</b> GTTTT <b>T</b> AATATCAG <b>A</b> GA                                  |
| 85  | 42 | TCACGT <b>T</b> G <b>A</b> CA <b>A</b> T <b>G</b> T <b>A</b> CC <b>G</b> A <b>A</b> GC <b>C</b> TT <b>T</b> A <b>A</b> T <b>A</b> AG <b>A</b> A <b>A</b> ATA                                   |
| 86  | 42 | TTCATT <b>G</b> CC <b>A</b> G <b>A</b> GT <b>C</b> CA <b>A</b> AAAA <b>A</b> AG <b>C</b> CT <b>T</b> G <b>A</b> T <b>A</b> A <b>G</b> TA <b>A</b> G                                            |
| 87  | 42 | TCACC <b>A</b> G <b>A</b> T <b>C</b> CT <b>G</b> A <b>T</b> G <b>C</b> TT <b>T</b> G <b>A</b> C <b>G</b> A <b>G</b> A <b>C</b> T <b>G</b> CG <b>C</b> GG <b>A</b> G <b>A</b> T <b>G</b> A      |
| 88  | 42 | GGT <b>G</b> T <b>A</b> CC <b>A</b> G <b>T</b> CA <b>G</b> A <b>T</b> G <b>A</b> T <b>A</b> C <b>A</b> GG <b>A</b> G <b>T</b> G <b>A</b> GC <b>A</b> T <b>T</b> GA <b>A</b> AC <b>C</b> G      |
| 89  | 42 | ATTATA <b>C</b> A <b>G</b> AC <b>C</b> A <b>G</b> CA <b>A</b> CG <b>G</b> A <b>G</b> A <b>T</b> TT <b>G</b> T <b>C</b> ACC <b>C</b> T <b>C</b> A <b>C</b> AG <b>G</b> A <b>G</b>               |
| 90  | 42 | GTT <b>G</b> AG <b>G</b> G <b>C</b> TTTT <b>G</b> G <b>A</b> CG <b>T</b> GG <b>G</b> A <b>A</b> GA <b>A</b> AG <b>A</b> GG <b>A</b> C <b>A</b> CT <b>G</b> ATA                                 |
| 91  | 42 | ATACAT <b>G</b> C <b>A</b> GG <b>T</b> CA <b>A</b> CC <b>T</b> C <b>A</b> GA <b>A</b> CC <b>G</b> CA <b>T</b> CA <b>T</b> CG <b>A</b> T <b>G</b> A <b>A</b> C                                  |
| 92  | 42 | AAGCC <b>G</b> TT <b>T</b> C <b>A</b> G <b>C</b> T <b>A</b> ACC <b>A</b> CC <b>A</b> CC <b>C</b> CT <b>A</b> TGG <b>T</b> G <b>A</b> AG <b>T</b> G <b>T</b>                                    |
| 93  | 42 | TTCCGG <b>T</b> CA <b>C</b> T <b>G</b> T <b>A</b> G <b>T</b> AG <b>C</b> G <b>A</b> T <b>A</b> G <b>C</b> T <b>T</b> AG <b>G</b> CT <b>G</b> A <b>T</b> GT <b>A</b> TA <b>A</b> C              |
| 94  | 42 | TGTA <b>A</b> AT <b>A</b> T <b>T</b> A <b>A</b> G <b>A</b> GC <b>T</b> TT <b>A</b> GC <b>G</b> T <b>C</b> A <b>G</b> A <b>T</b> AG <b>C</b> CA <b>C</b> CC <b>C</b>                            |
| 95  | 42 | AGTT <b>A</b> AT <b>C</b> A <b>G</b> A <b>G</b> CC <b>T</b> T <b>A</b> T <b>T</b> AG <b>C</b> G <b>T</b> TT <b>C</b> A <b>A</b> G <b>T</b> TC <b>G</b> CT <b>G</b> A <b>G</b>                  |
| 96  | 42 | CACCG <b>A</b> CT <b>T</b> G <b>C</b> AG <b>T</b> A <b>G</b> C <b>A</b> CC <b>A</b> TTTT <b>T</b> A <b>A</b> T <b>G</b> G <b>A</b> T <b>A</b> T <b>C</b> ACC <b>G</b> T                        |
| 97  | 42 | GCA <b>A</b> AG <b>C</b> GA <b>A</b> TT <b>A</b> TA <b>A</b> T <b>A</b> C <b>A</b> TT <b>T</b> G <b>A</b> G <b>C</b> AA <b>A</b> GA <b>A</b> T <b>C</b> T <b>T</b> CT <b>G</b>                 |
| 98  | 42 | TGCG <b>G</b> A <b>A</b> GA <b>T</b> TT <b>A</b> GA <b>A</b> T <b>C</b> GC <b>G</b> C <b>A</b> G <b>A</b> GA <b>A</b> GA <b>T</b> GA <b>C</b> TT <b>C</b> T <b>G</b> T                         |
| 99  | 42 | ACCT <b>A</b> AA <b>A</b> AC <b>T</b> T <b>G</b> T <b>A</b> AA <b>C</b> AA <b>C</b> AT <b>C</b> A <b>A</b> GT <b>T</b> AC <b>A</b> AG <b>T</b> ATT                                             |
| 100 | 42 | G <b>C</b> GC <b>G</b> T <b>A</b> GC <b>C</b> GC <b>G</b> CA <b>C</b> A <b>A</b> CT <b>T</b> CA <b>A</b> C <b>A</b> GC <b>T</b> TT <b>T</b> G <b>C</b> G <b>C</b> A <b>G</b> A <b>T</b>        |
| 101 | 42 | CGCT <b>G</b> A <b>G</b> ATT <b>A</b> AC <b>A</b> G <b>C</b> AA <b>A</b> TT <b>A</b> AC <b>G</b> TT <b>C</b> A <b>A</b> C <b>A</b> G <b>A</b> TA <b>A</b> T <b>C</b> C                         |
| 102 | 42 | GCC <b>A</b> TT <b>G</b> T <b>A</b> G <b>C</b> A <b>A</b> G <b>T</b> G <b>A</b> GG <b>C</b> G <b>T</b> C <b>A</b> G <b>T</b> AG <b>C</b> C <b>A</b> G <b>C</b> T <b>A</b> AAA <b>A</b>         |
| 103 | 42 | TG <b>A</b> TT <b>G</b> T <b>A</b> AG <b>G</b> TT <b>A</b> AG <b>C</b> AA <b>T</b> G <b>A</b> AAAA <b>A</b> T <b>A</b> C <b>A</b> G <b>A</b> G <b>T</b> ACT <b>T</b> C <b>T</b>                |
| 104 | 40 | TC <b>C</b> T <b>T</b> AG <b>A</b> CA <b>A</b> AT <b>G</b> C <b>C</b> TT <b>G</b> A <b>G</b> T <b>A</b> AC <b>A</b> C <b>A</b> CC <b>C</b> CG <b>C</b> ATT                                     |
| 105 | 40 | AG <b>C</b> CG <b>C</b> GA <b>A</b> T <b>T</b> A <b>A</b> T <b>A</b> T <b>A</b> TTTT <b>T</b> AG <b>T</b> TC <b>G</b> CT <b>A</b> TT <b>A</b> CT <b>T</b> GA                                   |
| 106 | 40 | T <b>C</b> T <b>G</b> T <b>A</b> A <b>A</b> T <b>A</b> CC <b>A</b> G <b>A</b> T <b>A</b> G <b>T</b> GG <b>C</b> A <b>A</b> T <b>T</b> AG <b>G</b> A <b>G</b> CA <b>A</b> G <b>T</b> CCA        |
| 107 | 40 | GG <b>A</b> T <b>T</b> C <b>A</b> G <b>C</b> AG <b>C</b> T <b>G</b> AA <b>A</b> T <b>G</b> G <b>A</b> T <b>T</b> A <b>T</b> TC <b>A</b> G <b>T</b> G <b>C</b> T <b>A</b> C <b>A</b> G <b>G</b> |
| 108 | 39 | AT <b>G</b> AA <b>A</b> T <b>A</b> GT <b>T</b> G <b>T</b> CCA <b>A</b> ACT <b>G</b> CG <b>G</b> A <b>T</b> GT <b>T</b> TA <b>A</b> TTTT <b>T</b>                                               |
| 109 | 39 | T <b>G</b> AA <b>A</b> GT <b>C</b> CT <b>C</b> A <b>G</b> AG <b>C</b> TTTT <b>T</b> T <b>G</b> CC <b>A</b> CC <b>C</b> T <b>T</b> TC <b>A</b> T <b>A</b>                                       |
| 110 | 39 | G <b>C</b> G <b>T</b> TA <b>A</b> AA <b>C</b> AG <b>T</b> A <b>C</b> A <b>T</b> TTTT <b>T</b> T <b>A</b> AA <b>T</b> CA <b>A</b> TA <b>A</b> A <b>T</b> TA                                     |
| 111 | 39 | T <b>A</b> CC <b>A</b> T <b>A</b> AG <b>T</b> T <b>G</b> G <b>C</b> AAA <b>T</b> TTTT <b>T</b> T <b>C</b> A <b>A</b> C <b>A</b> GT <b>A</b> T <b>C</b> AC <b>C</b> T                           |
| 112 | 39 | AG <b>A</b> G <b>A</b> T <b>A</b> TA <b>A</b> AG <b>G</b> G <b>A</b> T <b>T</b> TTTT <b>T</b> TT <b>A</b> G <b>A</b> C <b>A</b> G <b>C</b> GT <b>G</b> CT <b>T</b>                             |
| 113 | 38 | CG <b>A</b> ACT <b>A</b> AC <b>G</b> G <b>T</b> TTTT <b>T</b> TT <b>A</b> CA <b>A</b> C <b>A</b> T <b>T</b> AT <b>T</b> CA <b>A</b> T <b>C</b> A <b>T</b>                                      |
| 114 | 36 | A <b>A</b> TT <b>C</b> GA <b>A</b> AT <b>A</b> GG <b>T</b> G <b>T</b> A <b>T</b> TTTT <b>T</b> TT <b>C</b> AC <b>C</b> G <b>T</b> A <b>C</b> T <b>C</b> A                                      |
| 115 | 36 | G <b>A</b> T <b>G</b> G <b>C</b> T <b>G</b> A <b>T</b> A <b>G</b> C <b>A</b> G <b>C</b> A <b>T</b> TTTT <b>T</b> TT <b>C</b> C <b>G</b> T <b>A</b> AT <b>C</b> A <b>G</b> T <b>A</b>           |
| 116 | 36 | TT <b>G</b> ATT <b>C</b> A <b>T</b> A <b>C</b> G <b>G</b> ATT <b>T</b> TTTT <b>T</b> TT <b>C</b> G <b>C</b> CT <b>G</b> ATT <b>G</b> CT                                                        |
| 117 | 36 | AG <b>C</b> T <b>G</b> AA <b>A</b> AA <b>T</b> AC <b>C</b> GA <b>T</b> TTTT <b>T</b> TT <b>A</b> C <b>G</b> A <b>A</b> CC <b>A</b> CC <b>A</b> G                                               |
| 118 | 34 | CA <b>A</b> AA <b>T</b> CA <b>A</b> T <b>C</b> A <b>A</b> GG <b>T</b> G <b>A</b> G <b>A</b> CT <b>C</b> CT <b>C</b> AG <b>T</b> A <b>C</b>                                                     |
| 119 | 34 | TC <b>A</b> TT <b>A</b> CC <b>T</b> CA <b>A</b> C <b>A</b> T <b>A</b> TT <b>T</b> G <b>C</b> A <b>C</b> G <b>T</b> AA <b>A</b> TT <b>A</b> A <b>C</b>                                          |



|     |    |                                    |
|-----|----|------------------------------------|
| 120 | 34 | AATCAATCCGACAATCTGACCTGAAAGCATGGCT |
| 121 | 34 | GTAATCTACTTTAACTACAGAGGCTTTGATTAAA |
| 122 | 30 | CAGATAGAAGAATTCTCAAATGCTTTAAAC     |
| 123 | 27 | CTAATTTACGCTGTCCAGACGACGACA        |

**Supplementary Table 12** Staple sequence for the DX-based triangular DNA origami of 128-bp edge-length without internal mesh. The sequence is represented by colors; unpaired nucleotides with blue, crossovers with orange, and the 14-nt seed dsDNA domain with green.

| Staple ID | Length (bp) | Staple sequences                                                                                                         |
|-----------|-------------|--------------------------------------------------------------------------------------------------------------------------|
| 1         | 77          | CAAAGGGCGAA <del>TTTCTATCAGGGCGATGGCCACTG</del> CTCATTTTTT <del>TTTTTTT</del> ACCAATAGGC<br>C <del>GG</del> ACTCCAACGT   |
| 2         | 77          | GAGAAAGGAAG <del>TTTAGCGAAAGGAGCGGGCGT</del> AGACTAGGTGAA <del>TTTTTTT</del> ATCCTTTTTG<br>A <del>TGG</del> CGAACGTGGC   |
| 3         | 77          | CAGGACCACTT <del>TTTCGGCCCTTCCGGCTGGCTGGT</del> ACTATGGATGA <del>TTTTTTT</del> CGAAATAGAC<br>A <del>GCG</del> GATAAAGTTG |
| 4         | 58          | GACCGAGATAGGG <del>GGGGCCAGATGGTAA</del> GGTATCATTG <del>CAGCACT</del> TTGAGTGTTGTC                                      |
| 5         | 42          | TAGGTGCCTC <del>AGCGTTGCGCTCTGGATGGAGGA</del> TCGCTGAGA                                                                  |
| 6         | 42          | ATTGGTAACT <del>GGCTACAGGGCGCACATTAATTC</del> TGATTAAGC                                                                  |
| 7         | 42          | TTTACTCATA <del>TACCCGCCGCGCTTAATGCGCT</del> CAGACCAAG                                                                   |
| 8         | 42          | TTGATTTAAA <del>ACACGCTGCGCGTAACCACCACA</del> TACTTTAGA                                                                  |
| 9         | 42          | AATTTAAAAG <del>GGGCGCTGGCAAGTGTAGCGGT</del> CATTTTT                                                                     |
| 10        | 42          | CCAAAATCCCT <del>TAGAGCTTGACGGGGAAAGC</del> CAATCTCATGA                                                                  |
| 11        | 42          | TTTCGTTCCA <del>CCCTAAAGGGAGCCCCGATT</del> AACGTGAGT                                                                     |
| 12        | 42          | ACCCCAATCA <del>TCCGTAAAGCACTAAATCGGAAT</del> GAGCGTCAG                                                                  |
| 13        | 42          | GTTGTAATTC <del>GAAAGTTTTTGGGGTCGAGGT</del> GATGTACCCCG                                                                  |
| 14        | 42          | TTGTTAAATC <del>AACGTGAACCATCACCTAATCC</del> GTTAAATTT                                                                   |
| 15        | 42          | AATCCCTTAT <del>AGAGTCCACTATTAAGAACGTA</del> AATCGGCAA                                                                   |
| 16        | 42          | TCGTAGTTAT <del>CCCGGTGAGCGTGGGTCTCGCGC</del> CCTCCGTA                                                                   |
| 17        | 42          | GGAGTCAGGC <del>ATTATTGCTGATAAATCTGGAGT</del> ACACGACGG                                                                  |
| 18        | 26          | CAGTTTGAACA <del>AAATCAAAGAATA</del>                                                                                     |

**Supplementary Table 13** Staple sequence for the 6HB-based triangular DNA origami of 128-bp edge-length without internal mesh. The sequence is represented by colors; unpaired nucleotides with blue, crossovers with orange, and the 14-nt seed dsDNA domain with green.

| Staple ID | Length (bp) | Staple sequences                                                                                  |
|-----------|-------------|---------------------------------------------------------------------------------------------------|
| 1         | 58          | GAGTAT <del>GGACCGAATGATAATCTCATGA</del> AGAAAGGAAGGG <del>TTTTTT</del> AGAAAGCGAAAG              |
| 2         | 58          | TGAGAG <del>TTGACGC</del> CACCGAGATAGGG <del>TTT</del> CTATCAGGGCG <del>TTTTTT</del> TGGCCACTACG  |
| 3         | 58          | TTTATA <del>GCGGCAA</del> CCACGACGGGGAGT <del>CAA</del> AAGGTGGCAT <del>TTTTTT</del> AATAGGTGAGAT |
| 4         | 57          | GGTAAGCCCTCC <del>TTT</del> AGTTATCT <del>AAATTAATAGACTGGAT</del> TTTTCGGATAAAGTTGC               |
| 5         | 57          | GCAAAATCCCTTA <del>TTTAAAGAATA</del> GGGGCAAGAGCAACT <del>TTTT</del> CGCATACACTATT                |
| 6         | 57          | TTTAAAAGGATCT <del>TTT</del> GATCCTTT <del>TGGAGCTAACCGCTTTTTTT</del> CAACATGGGGGAT               |
| 7         | 52          | AGCTTC <del>CGTTAAT</del> GGACCCAGAAAAG <del>TTTTTT</del> TGGTAGCAAATACGCACTA                     |
| 8         | 52          | ATCGGAGAGTATT <del>CT</del> TAGTGACGTAA <del>TTTTTT</del> TCCGGGTGGTTGGATCT                       |

|    |    |                                                                                |
|----|----|--------------------------------------------------------------------------------|
| 9  | 51 | GTAATC <b>TTTTTT</b> GTACTATGCAGTAACTTGTCCGAGG <b>TTTTTTT</b> TCCAG            |
| 10 | 48 | CTAAGAGACAAATTAC <b>ATTCGCCGCATTTT</b> GGAAG <b>CGT</b> GGAAGAACC              |
| 11 | 48 | AATCGA <b>CCACACGTT</b> CATGAGACAATA <b>ACTTTGAT</b> CACTTCATTTTTAA            |
| 12 | 48 | ATCATA <b>ACTCAGGAGTGCACGAGTGGGTT</b> GGTTG <b>AT</b> AGGCCGAAATCG             |
| 13 | 45 | GACAGGAGAT <b>T</b> TGCAG <b>CGCCCTCCGGCTGGA</b> AGAGT <b>TC</b> CTATAT        |
| 14 | 45 | GAGCGGGCG <b>CATTTAA</b> AGTTGGGAACCGG <b>AGT</b> ATCCG <b>CT</b> TGGCGG       |
| 15 | 45 | TGAACCATC <b>AT</b> AACCA <b>AGTACTCACCAGT</b> CACAGTT <b>G</b> TAGTTAT        |
| 16 | 44 | GCGGCCAC <b>G</b> TAGAA <b>GTAGCCTCTCACCCCT</b> TGGTT <b>TG</b> TCTCGC         |
| 17 | 43 | CATGTA <b>ACTCGCCCTGATAAATGCTTCAATTTT</b> AAAAAGGAA                            |
| 18 | 43 | CTCAGAATGAC <b>TTACATCGAACTGGATCTCATT</b> TAAAGATCCT                           |
| 19 | 43 | AGGACCACT <b>TCGAATTCGACGAAAGGGCCTT</b> ACGCCTATT                              |
| 20 | 42 | TCAAC <b>AACCTGTATCACTAGGTACATGT</b> GAGCACTTGGTGGC                            |
| 21 | 42 | CTGGCGCCCGT <b>TC</b> CACTATTACAGGTACGAGC <b>GA</b> AACAAAAT                   |
| 22 | 42 | CACATT <b>AATAGACA</b> AACTATTA <b>ACTGGCG</b> TTTCT <b>TG</b> AAAAGA          |
| 23 | 42 | TAACCA <b>CGGTAAC</b> TGTGACACCACGAT <b>GGGAACC</b> CCGGACCA                   |
| 24 | 42 | TTGACG <b>GTTTCGT</b> TC <b>ACTGCGGCCAACT</b> GCCCTT <b>AT</b> CTTCAC          |
| 25 | 42 | AGCACT <b>AGTTGTA</b> AAGTAAGAGAATTAT <b>G</b> CTCAC <b>CA</b> CAGTCT          |
| 26 | 42 | TCCTAG <b>ACGT</b> CGA <b>CATATAGAACA</b> AGTAGCGT <b>GGA</b> TTGCTG           |
| 27 | 42 | ATGACAAAGTCAAAT <b>TCTCTGAATCTGTGAGCCGGT</b> GCAAATT                           |
| 28 | 42 | GGTTGG <b>TGAAACA</b> AT <b>GCGCTCCAGGCT</b> GAGGCAA <b>CT</b> TACTCT          |
| 29 | 42 | AATAAT <b>GGA</b> ACTA <b>CTATGGATGAACGAA</b> ATTGCGT <b>TG</b> GTAATA         |
| 30 | 42 | ACACCA <b>ATTTAAA</b> AAGAC <b>GT</b> CAGGT <b>GGCT</b> TGCGC <b>AG</b> ATCGCT |
| 31 | 42 | AACAAC <b>GACTTTT</b> CTTGTGCAATC <b>TACCC</b> GGTA <b>CC</b> AGGGCG           |
| 32 | 42 | GAGAT <b>AGCCGCTACC</b> AGGTATTTATTT <b>AT</b> CATT <b>CA</b> GGGAAA           |
| 33 | 42 | CGTGTAT <b>TCGTGTAGCCGCGTTAATGCGT</b> GCCT <b>CCA</b> ATGGC                    |
| 34 | 42 | TGTGCG <b>CCCTGTA</b> GACTGATTAAGCATT <b>CACACC</b> CTACTCAC                   |
| 35 | 42 | ATCTGG <b>ACAGTTATCTATTTGTTTATTTG</b> ACGAG <b>CG</b> TCAGAC                   |
| 36 | 42 | ACCAAA <b>CTTCTAA</b> ACCATGTTACT <b>TTGGT</b> GAGAAA <b>CC</b> TGCGCG         |
| 37 | 42 | CAAGTT <b>TGGT</b> CAC <b>GATAGTGT</b> TAAATAAGTGATA <b>AT</b> ACATTC          |
| 38 | 42 | ACATCG <b>AA</b> TTTT <b>CCTGGCAAGTGTAGCA</b> CTCAT <b>AA</b> AGCCAT           |
| 39 | 42 | AAATAT <b>GCTGAATGTATACTTTAGATTGT</b> AGGGC <b>GAG</b> CAGAT                   |
| 40 | 42 | ATAAGT <b>AAAGCTTAA</b> CGAA <b>ACCTTGCACT</b> AT <b>TG</b> CATAAG             |
| 41 | 42 | GACGT <b>AGCG</b> AAA <b>T</b> CGGCGAAC <b>GTGGCG</b> CAAAA <b>TG</b> ACAACG   |
| 42 | 42 | CCGTGT <b>CTACTTCTCCCTTAACGTGAGT</b> GGAAG <b>CT</b> TTATA                     |
| 43 | 42 | TGTGTA <b>AGTAAATATTCCTTTTTTTGCGGT</b> GATA <b>ACC</b> ACTGA                   |
| 44 | 42 | ACCAT <b>AGC</b> ATTT <b>TCTCGATATTCACAAA</b> AGGAA <b>CT</b> TAGAGC           |
| 45 | 42 | GCGTCAG <b>CCCCGATTGCTATGCAAAA</b> ATATTAC <b>CG</b> CCTCC                     |
| 46 | 42 | ATTATC <b>TGAATCG</b> ACCCTAAAGGGAG <b>CACCCCA</b> ATGCCATA                    |
| 47 | 42 | TGTTTT <b>TGCAGTGCTCATATGTACCCCGAAT</b> CGG <b>AT</b> ATCCAA                   |
| 48 | 42 | AGATGAG <b>ACTAGTCCAGAA</b> ACGCTGGT <b>GG</b> CATG <b>ACT</b> TCGCGT          |
| 49 | 42 | ACGGAT <b>GAAAGTAAGACAGTCTGGCAA</b> TAAGTGG <b>CG</b> CCGTAA                   |
| 50 | 42 | TAAATTT <b>TCGAGTTAACGCAAGCAAG</b> AGGTAG <b>CA</b> AGATGC                     |
| 51 | 42 | GTGTTG <b>CT</b> ATTA <b>ATCAAGTTTTTTGGG</b> TTGTTA <b>AG</b> CATCTT           |
| 52 | 42 | TGAAGA <b>TCAGAAA</b> AATCAGCTC <b>ATTTTT</b> CCCTAA <b>TA</b> CCGTGT          |
| 53 | 42 | TGCTAT <b>GCCAATGATTAGAAGTTAGAAA</b> ATTCTG <b>AA</b> GGGCGA                   |
| 54 | 42 | GGTAT <b>ACATAGTCTAGTACAACCTTATTATCTT</b> CTGAGGGG                             |
| 55 | 41 | AAAAC <b>GGAGTGTGTATTATCCCGTATTT</b> TCGC <b>CT</b> CGGGT                      |
| 56 | 41 | AGCTA <b>TTTTTGA</b> CCGAAGAAC <b>GTTTTT</b> GGCGC <b>GG</b> TTCCAG            |
| 57 | 40 | ATAAAT <b>CA</b> AACGA <b>AGCGTTGTTTTGAT</b> AGAAGAATAATTG                     |
| 58 | 40 | TGAGCTGGTT <b>GGAACGTGGACTCCACA</b> AGAG <b>TA</b> AAGTTC                      |
| 59 | 39 | GGGGT <b>TTTTTTT</b> GGTCATACCTAT <b>GCGAAGGAA</b> ACATTT                      |
| 60 | 39 | AGCGC <b>TTTTTTT</b> GATTAAGCACT <b>ACGTTAATT</b> CATGAT                       |
| 61 | 39 | AGGGAAAACA <b>ACCTTCAAACGGGTAG</b> CGCAG <b>CA</b> CAGAGA                      |

|    |    |                                        |
|----|----|----------------------------------------|
| 62 | 39 | TGTTGTACTCTATGTGCGATGTGACCTTGCTATACAAA |
| 63 | 27 | ACGACGAGCGCTCGACTGGGGCCAGAT            |
| 64 | 23 | TTTGGAACGTCAACATAATTAT                 |

**Supplementary Table 14** Staple sequence for the DX-based hexagonal DNA origami of 74-bp edge-length without internal mesh. The sequence is represented by colors; unpaired nucleotides with blue, crossovers with orange, and the 14-nt seed dsDNA domain with green.

| Staple ID | Length (bp) | Staple sequences                                                                |
|-----------|-------------|---------------------------------------------------------------------------------|
| 1         | 78          | AGCAATGGCAACTTTTTTGCGCAAACCTATTGAGGCGGATAATTTAGTTGCAGGACCACTTCTGCGCCACGATGCCTGT |
| 2         | 78          | TCAAGTTTTTTGTTTCGAGGTGCCGTAAAGCATTGGTATTTACTGTGACACCAAGTTTACTCACCATCACCTAA      |
| 3         | 78          | AACCACCACACCTTTTGCGCTTAATGCGCAGCCGGTGAGCTTTGTGGGTCTCGCGGTATCATTGTACGCTGCGCGT    |
| 4         | 78          | ACTATTAAGAAATTTGACTCCAACGTCAAAGGATCTAGTTTTGAAGATCCTTTTTGATAATCGGAACAAGAGTCC     |
| 5         | 78          | AGGCCGAAATCGTTTAATCCCTTATAAATCGTCAGACCCCTTAATCATATGTACCCCGGTTGTTTTTTAACCAAT     |
| 6         | 78          | CGGCGAACGTGGTTTAAAGGAAGGGAAGATCTACACGACGTTGGGAGTCAGGCAACTATGGATTGACGGGGAAAGC    |
| 7         | 47          | AATAGACTGGATGAAGTGGCGAACTACTTACTCTAGCTTTTGTTAA                                  |
| 8         | 42          | CCGGCTGGCTGGCGTTGCGCTCGAGCGTGACACTCGGCCCTT                                      |
| 9         | 42          | GATAAATCTGGCTACAGGGCGCACATTAATTGTTTATTGCT                                       |
| 10        | 42          | GCCAGATGGTAGGGCGCTGGCAAGTGTAGCGGCAGCACTGGG                                      |
| 11        | 42          | TATCGTAGTTAAAGCGAAAGGAGCGGGCGCTAAGCCCTCCCG                                      |
| 12        | 42          | GACAGATCGCTGGGAGCCCCGATTTAGAGCTGAACGAAATA                                       |
| 13        | 42          | CCTCACTGATTGCACTAAATCGGAACCTAAAGAGATAGGTG                                       |
| 14        | 42          | TAGATTGATTGGGGCGATGGCCACTACGTGAATATATACTT                                       |
| 15        | 42          | TTTTAATTTAAAGGGCGAAAAACCGTCTATCAAAAACCTTCAT                                     |
| 16        | 42          | AATCCCTTAAAGGTTGAGTGTGTTCCAGTTTCATGACCAA                                        |
| 17        | 42          | GTTCCACTGACAAAAGAATAGACCGAGATAGGTGAGTTTTC                                       |
| 18        | 37          | TCAGCTCAAATTCGCGTTAAATTTCCCGCAACAATT                                            |

**Supplementary Table 15** Staple sequence for the 6HB-based hexagonal DNA origami object of 74-bp edge-length without internal mesh. The sequence is represented by colors; unpaired nucleotides with blue, crossovers with orange, and the 14-nt seed dsDNA domain with green.

| Staple ID | Length (bp) | Staple sequences                                         |
|-----------|-------------|----------------------------------------------------------|
| 1         | 55          | CATTCCATAAAACGAACTAGAGCCACCATAACAACGCTGAGACTCCTCAAGTCGAG |
| 2         | 50          | GTAAATACGTAAATTTTCATCGGCATTTTCGGTTAGCCCCCTTATTGCC        |
| 3         | 49          | ACCAGAATGAGAAAGTGTACTGGTAATAAGTTAACGGGTGTCAGATAAA        |
| 4         | 49          | ACGGTCAGCCACGACCACAGAGCCCGCTTATTGACAGGAGAGGTG            |
| 5         | 48          | CGCTCCCTTGGCCACCCTCATTAGCAAGTTTGGCGAAATGCAA              |
| 6         | 48          | GGATGAGTACCGGCACCAACTTTTAAACGAAAGAAGGAGTTTCAAACGG        |

|    |    |                                                  |
|----|----|--------------------------------------------------|
| 7  | 48 | ATAGCCCGGACACCCTCTTTCAGGGATAGCAAGTTTCGATTAGGATTA |
| 8  | 48 | ATTACAGAAAGATTTGGGAAGATTTTCTACGTTAACAGACAGCATA   |
| 9  | 48 | AGCCAGAATTTAGCGAGTCTCGCGCAAAGATTTCAAAGGGAATTC    |
| 10 | 48 | TATTATTCTTCATGAAAGTATCTGGCATGATTTTAAGACTCAGGAA   |
| 11 | 46 | TCATTAAGTTGAGGCTTGATACCGATAGAAAGAGGAATGCTTTAAA   |
| 12 | 46 | GTTAGCGTAAACAGGACGCATCAGTTGAGATTTACCAGACTTATTA   |
| 13 | 46 | TTTACCATGAATTCGTTGAAAATCTCAAATCAATTTTGCCAGAG     |
| 14 | 46 | TTTCAGCGGAGCAGTAGCATAACCCTCGTTAAGAGCACACCACG     |
| 15 | 46 | ATCAAGTTAGCGTTGACTTTTTTCATGAGGCAAAAACAACAGGTCA   |
| 16 | 46 | AAAGGAGCCTTATCTTGATGTTTAGACTGGATTGGCATCCGACATT   |
| 17 | 46 | GCAACATTTGCCTTGATGGGATTTTGCTAATTTCAAACGAGGCATAG  |
| 18 | 46 | GCAGCGAAAGAGTACAAACCGAAAGACTTCAAATTAATACGTCACC   |
| 19 | 46 | CAACAACCATCATCATAAGAATGACCATAAATTAGTTTGACCGACT   |
| 20 | 46 | CCATTAACAGAACAGGCCGCTTTTGCGAAATTGTTGCATCAAAAA    |
| 21 | 45 | TAAGACACTATAAATTGGGTTTTAGATGGTTTAAACAACCTTCAG    |
| 22 | 45 | GGGGAGTAAAACAAGAACCGTTTTTCATTACCAAAAAAAAACCA     |
| 23 | 45 | CAGTAAAACGAGGGAACCGATTTTACCAACTTTGTGCGCCGTGA     |
| 24 | 45 | GATTGGAAGCCGAGATTTGTTTTATCGCCTGATGGATCGTCTCA     |
| 25 | 43 | ACAAAGTTAGGAATCTCATTATACCAGTGATCTAATCGGAACC      |
| 26 | 43 | ATCTTACAGGAATCTTTAATCATTGTGTTTCTGTAGTAACA        |
| 27 | 43 | GAAAAGGAGCGTCCTTCATCAAGAGTATAATTGTCATTAA         |
| 28 | 43 | GTCAATAACCCCTCAACAGATGAACGGTGTAAACAACAGGTCA      |
| 29 | 43 | ACATGTTATCGCGAAGCGCAAAACAACAGCATCACCGGAAC        |
| 30 | 43 | GGATGGCTGCAAACTAATACACTAAAAAGACTAAATGCCATC       |
| 31 | 42 | ACCGCTAGGAACCCTGCCACTACGAATTTAATTGCTTTAGT        |
| 32 | 42 | CCACAAGAATAGCGTGAATAAGGCTTGAAAGGAACATGGCT        |
| 33 | 42 | GATTCCCGACTATTCATGTTACTTAGCCTCGGTCCGTCAGAG       |
| 34 | 42 | ACTCAGGAGGTCTGTAGCGCGTGTCTCAGTACCATATCACCGT      |
| 35 | 42 | CTTTGAGCTCATCTGAACCAGACCGGAATAGAGCTCGACAGA       |
| 36 | 42 | CGCAGTAGCCATTAGTTTTGTCTCTTGAAGTGAACCAT           |
| 37 | 42 | ATTTAATCCAGACAGTTAATGCCCTTGTAGCTAGCCGA           |
| 38 | 42 | TCAACTAAAGCAGAAAACGTAGAAAATATAAAACGTTAGTA        |
| 39 | 42 | GTGCCCGCATACATTTTTTAAAGAAAAGTATGCAGATTATGCG      |
| 40 | 42 | AATGAATAATTACCTACATAACGCCAAGAAGCCCAAAGGTG        |
| 41 | 42 | GAACCGCATAGGTGGGCGGATAAGTGCAGAGAAGGTCAACCAG      |
| 42 | 42 | GAATAAGATACAGGAGAAAGGAACAACCTCCTGACGACGATA       |
| 43 | 42 | TTTGATGTTTATTTTAAAGCCCAATAACCAGACGAGAAAC         |
| 44 | 42 | AAAACCAATTGAGTGTCAATCAATACGTCATATTGCGAA          |
| 45 | 42 | AAGCTGCTTTTTCAACCGTTCAGTAAGGAAAATAGATAAC         |
| 46 | 42 | TAATAATTCATTACAGAGAGGCTTTTGCAATCAGAGCATATGG      |
| 47 | 42 | CAACCGAATAAATCATCGGTTTATCAGCGGCTGACAATACTG       |
| 48 | 42 | ATAGGCTTTGCTTTATATTACAAACAATTGAGGGGCGAGCT        |
| 49 | 42 | CGGAATCTTGGGGCAGGGAAGGTAATAGGCCTTGCAGGTG         |
| 50 | 42 | GACGATTTGACGGAGCTATATTTTCATGTCATAACAGGCGC        |
| 51 | 42 | AATTTCTTACAGACATATTCATTGAATCCCTGTTAAATTAT        |
| 52 | 42 | TGAGCCACAGAACCCATAACCGATATATGGAACGACAGGTCT       |
| 53 | 42 | CCGCCACTTTGGGACGAACGAGTAGATTCAAAAATGGCGCAG       |
| 54 | 42 | TTACCCATATTCTGATTAGAGCCAGCAACACCACCTTGAGGC       |
| 55 | 42 | TCCGCGAGAGTTAAGCCACCCTCAGAGCAATCACCAACAGTT       |
| 56 | 42 | TTGCAGGCTGCTCATAGTCAGAAGCAATCCATATAGTAGCA        |
| 57 | 42 | AATGAAAGCCACCGGAACGAGGGTAGCTTATACCTTTTAAT        |
| 58 | 42 | CCAGCGAACGGCTATCACCGGAACCGCATCGATAGCTCA          |
| 59 | 42 | TCGAGCTAATGCTGTAGCAGCACCGTAAATCAAACAGAGG         |

|    |    |                                                                                         |
|----|----|-----------------------------------------------------------------------------------------|
| 60 | 42 | TTTTCA <b>TT</b> CAGTA <b>GT</b> AATT <b>GT</b> GGAAT <b>ATT</b> CAAAG <b>CT</b> TGACCC |
| 61 | 40 | ACCGA <b>TT</b> ACGCAATAA <b>TA</b> ACGGAA <b>TC</b> AACGGAACACATT                      |
| 62 | 39 | GCGGGGTTTT <b>GT</b> ACCG <b>TA</b> ACACT <b>G</b> AGCCCA <b>AA</b> CCCTCA              |
| 63 | 39 | TACTA <b>TTT</b> AGTAGCATT <b>G</b> CGCTAA <b>TA</b> AAGA <b>AG</b> CGTAACA             |
| 64 | 39 | CTAA <b>ATT</b> GGT <b>GT</b> CTGGAAG <b>TT</b> CA <b>TA</b> GCGGAT <b>GT</b> CGAAA     |
| 65 | 39 | TACAAA <b>CC</b> CTCA <b>TA</b> GA <b>ACC</b> GGCC <b>ACC</b> CTACGATATAAGT             |
| 66 | 38 | AGAA <b>ATT</b> TCGCAAAG <b>AA</b> GAAACAAT <b>GT</b> TAGCAATAGCT                       |
| 67 | 38 | AATT <b>TTTT</b> TCACCGT <b>CA</b> CCATTAGAT <b>TTTT</b> TCGCAAATG                      |
| 68 | 38 | TTTAG <b>TTTT</b> CGTCAG <b>AC</b> CTTTTGATA <b>ATT</b> TCATTTTTGC                      |
| 69 | 29 | AGGGTTCCAAAAG <b>AA</b> TAAGAG <b>GC</b> CTGTAG                                         |

**Supplementary Table 16** Staple sequence for the 6HB-based square DNA origami of 105-bp edge-length without internal mesh. The sequence is represented by colors; unpaired nucleotides with blue, crossovers with orange, and the 14-nt seed dsDNA domain with green.

| Staple ID | Length (bp) | Staple sequences                                                                                                               |
|-----------|-------------|--------------------------------------------------------------------------------------------------------------------------------|
| 1         | 57          | GTTTCC <b>AA</b> CAGCAT <b>TC</b> ATCTTT <b>TTTT</b> TCAA <b>AA</b> ATCACC <b>GG</b> TCAGACTG <b>TTTT</b> AGCGCG               |
| 2         | 55          | TAACAC <b>TG</b> CGATTTT <b>TA</b> AGACCCTCAG <b>AA</b> GA <b>ACC</b> AGCTGAGACTCCT <b>CA</b> CGTCGA                           |
| 3         | 53          | GCTGT <b>AG</b> T <b>C</b> ATT <b>GA</b> CA <b>AC</b> GGAG <b>ATT</b> GT <b>TT</b> TGATA <b>CA</b> ACCACCT <b>TTTT</b> GCCGCCG |
| 4         | 53          | ACATTT <b>CT</b> CGTTT <b>AC</b> GGT <b>GT</b> ACAG <b>ACC</b> AGGAACA <b>ACT</b> GAAT <b>TTTT</b> TCCAGTA                     |
| 5         | 53          | CAATA <b>TC</b> GGAA <b>CA</b> AGA <b>AC</b> CGAG <b>TAG</b> TA <b>AC</b> AGACA <b>GT</b> GCCCC <b>TTTT</b> TTTCGGA            |
| 6         | 52          | ATCAAG <b>AG</b> TCAGCGGAGT <b>GT</b> <b>TTTT</b> ATAGAA <b>AG</b> GCGCATAG <b>TTT</b> GACCTTC                                 |
| 7         | 52          | GAAATCC <b>GC</b> GAGGTGAATTT <b>TTTT</b> AAACAG <b>CA</b> TCATCGCCT <b>TTTT</b> TGTGTC                                        |
| 8         | 52          | CCACTAC <b>GT</b> CGTCACCCTCA <b>TTTT</b> TGCGAA <b>GT</b> TAAACGGG <b>TTTT</b> CGTAATG                                        |
| 9         | 52          | TCAACT <b>TT</b> CTACAACGCCTG <b>TTTT</b> CATTCC <b>AA</b> TTGGGCTT <b>TTTT</b> TTAATT                                         |
| 10        | 49          | TAGTAAGAG <b>TTTT</b> CA <b>CT</b> ATCATA <b>ACC</b> CGCAAAT <b>TTTT</b> AACTGTTA                                              |
| 11        | 49          | CGGATTGCA <b>TTTT</b> AAAAG <b>ATT</b> AAGAG <b>GA</b> GACCG <b>TTTT</b> ACTCCAACAG                                            |
| 12        | 49          | CAATACTGC <b>TTTT</b> ATCGTCATA <b>AA</b> TAT <b>CT</b> CAACA <b>TTTT</b> AAATATGCAA                                           |
| 13        | 49          | AAATCTACG <b>TTTT</b> ATA <b>AA</b> ACGA <b>ACT</b> AAACGGAA <b>TTTT</b> AAAGA <b>ACT</b> GG                                   |
| 14        | 45          | TATAGCCCG <b>GT</b> ACCGC <b>CC</b> CTCAGAG <b>CC</b> ACC <b>CC</b> CT <b>CT</b> CTCAGGA                                       |
| 15        | 44          | CCAG <b>CA</b> TCACCAGT <b>TTTT</b> GCACCATTAC <b>CC</b> ACCAG <b>GC</b> GATAGT                                                |
| 16        | 44          | TATACCAG <b>TG</b> ACTCC <b>TAC</b> ATACATA <b>AA</b> GG <b>TT</b> TATTC <b>TG</b> TCACCA                                      |
| 17        | 44          | CATGATTA <b>AC</b> AGGAC <b>GG</b> TGA <b>ATT</b> AC <b>TT</b> AT <b>GT</b> AGTTT <b>CG</b> AAACAT                             |
| 18        | 44          | ACCT <b>AG</b> GCAACATAT <b>TTTT</b> AAAAGAAACG <b>CC</b> AGTTA <b>ACC</b> CTCAT                                               |
| 19        | 44          | GCTATATT <b>TA</b> AAGGA <b>AG</b> ACA <b>AGA</b> ACCG <b>GA</b> TTGCTAA <b>AG</b> GCTTTT                                      |
| 20        | 44          | CTAAAGTA <b>CT</b> TAGAC <b>CT</b> CCAT <b>GT</b> TACT <b>TA</b> ATCGGT <b>TG</b> GAGGTT                                       |
| 21        | 44          | AGCG <b>TT</b> TCAACCGAT <b>TTTT</b> TGAGGGAGGG <b>AG</b> CAGT <b>CT</b> TAAAGG                                                |
| 22        | 44          | GTCAGGAT <b>TT</b> ATAGT <b>CCA</b> AC <b>CT</b> AAA <b>AC</b> GA <b>ATT</b> TAAAG <b>GA</b> GCCACC                            |
| 23        | 42          | TAGCGGGGTTA <b>TT</b> ACAGAGGCATTTT <b>CA</b> GGG <b>TG</b> ATTAGGAT                                                           |
| 24        | 42          | TTATTA <b>GA</b> TCGGC <b>ACT</b> CA <b>AG</b> CGA <b>AC</b> CAAGCCC <b>GT</b> GAGGAA                                          |
| 25        | 42          | AGTAC <b>CG</b> TATCACCGTTTTA <b>ATT</b> TCGA <b>GT</b> TTTTCGGTCTTGCTC                                                        |
| 26        | 42          | TCTACT <b>ATT</b> TAGG <b>ACT</b> GT <b>CT</b> ATT <b>CAG</b> TGGTCTTT <b>CG</b> GGGTCA                                        |
| 27        | 42          | TCCCA <b>ATT</b> TTGCA <b>ATA</b> AGGG <b>AA</b> CCGA <b>CA</b> AAAT <b>TA</b> CAAATA                                          |
| 28        | 42          | TCATTT <b>TAG</b> AAT <b>GA</b> A <b>AT</b> CTTT <b>GAC</b> CCCC <b>AC</b> ACGCAT <b>AA</b> CCGCC                              |
| 29        | 42          | GGTTTA <b>GA</b> ATAGG <b>TAG</b> GCGG <b>TA</b> AG <b>TG</b> CA <b>GAG</b> AA <b>GA</b> GCAAGC                                |
| 30        | 42          | TGACGA <b>GG</b> TAA <b>CG</b> AA <b>GT</b> G <b>CC</b> GT <b>ATA</b> AAA <b>AA</b> GAC <b>AG</b> GAAACG                       |

|    |    |                                              |
|----|----|----------------------------------------------|
| 31 | 42 | AGTTAGCAAACACCAACATTATTACAGGTA AACCGACCACGGA |
| 32 | 42 | ATAAGTTGAGTAACTCTAAAGTTTTGTCAATAAGGTTTCATCA  |
| 33 | 42 | GTGCCTTTATTTTGTAGCATT CAGAAGGAGAAAGACTTGCCC  |
| 34 | 42 | GTTGAGAATAGTAGT CACAATCAATAGATTTTAAACCAGACGT |
| 35 | 42 | TCAACGTTGAATTGTACTGGTAATAAGA AATTCACATCAAT   |
| 36 | 42 | TAGTAAAAACAAA GATACCACATTCAACAAGGTGGTATGGTT  |
| 37 | 42 | TACCAGCCAGGAGTTCTGTATGGGATTTATTCATTGATACAT   |
| 38 | 42 | GATGATAGCCAAA GGGCGCGAGCTGAATAATGCAACCCAAA   |
| 39 | 42 | AACGCCATCATTGACAAAAGGGCGACACATACATCAACTTT    |
| 40 | 42 | AGAGGACAATAATACCAGAATGGAAAGCAGGTAAATTAGAT    |
| 41 | 42 | AATTGCAGATGAACCAGACGACGATAATTTGACCTATTGAC    |
| 42 | 42 | GGAAATATTAAA GATTTTTTTCACGTTGTGACCAAAATAGCG  |
| 43 | 42 | AATCCTCATTCATTACGAGTAGATTTAGA AACCAACTTTGAA  |
| 44 | 42 | AGAGGCTTCTGCGAAAAGGTGAATTATCTTCACAACCAAAA    |
| 45 | 42 | CAGACGGCCAAAAGGATTGGCCTTGATAACCGTCAAGTTGAT   |
| 46 | 42 | AAAGGCTTCAATCAAGAAGTTTTGCCAATATAACCCGACTT    |
| 47 | 42 | GAGCCATGTCAGACGAGCCTTTAATTGTGCCGGAATAATAGT   |
| 48 | 42 | GAGGCA GTTGGGAAGGAAGTTTCATTCCGAGGGGGCAGGGCG  |
| 49 | 42 | AAAATGTGGTGTCTTTAGAGCCAGCAAAATTGACATATCAGC   |
| 50 | 42 | CGCGAAACAATGACACCTCAGAGCCGATTAGCAATATAAT     |
| 51 | 42 | TGCGCCGCAAAGTAATCCCCCTCAAATGTTGCTGAAGGCCGG   |
| 52 | 42 | AAACGT CGAGCCAACAACAACCATCGCCGCGATTACAGTTCA  |
| 53 | 42 | ACCCTCAACCAATGGGCTTAGAGCTTAAC TTTAAATACCAAG  |
| 54 | 42 | GAAAACGTGCGGATAAACCATCGATAGCCCTCAGAACCGAT    |
| 55 | 42 | ACACTAAGTCGCTGCCTCAGAGCCGCCAAGCACC GTAAGAGG  |
| 56 | 42 | ATATTCGAACACTCCATAAATCAAAAAC TTTTGATAATCAG   |
| 57 | 42 | TAGCGAACCGCCTCAGGCTTGCAGGGAGAGAGGCATTTACCC   |
| 58 | 42 | ACCGGAAGAATCAACCTTTAATTGCTCTCAGGTCAAGAAT     |
| 59 | 42 | TGACTATAGAGAGTAGTTTGCCTTTAGCGAACCAAGCCGCTTT  |
| 60 | 42 | TTTTCCGTTTGCCGGAACGAGGGTAGTTTTTCAAAGACTTC    |
| 61 | 40 | GAAAGTAAGAAAA TTTACGCAGTATGCAACTGGCTCAT      |
| 62 | 40 | AAATATCGCGTATGAGGACTAAAGCCAACGGCAGCCCCC      |
| 63 | 39 | CCAATA GCCGCCACACCTCAGAACC GCTTTGATATAAG     |
| 64 | 29 | GAGGGTAGCAAACGTTAAGAGTGTACCG                 |
| 65 | 24 | CAACAGTTAATCTTTACGAGGCA                      |
| 66 | 24 | TTGCTTTCGACCTGGGATAGCGTC                     |
| 67 | 24 | TGCGGGAAAGGCAGAAGCAAAG                       |
| 68 | 24 | GTACAAAATCATTTGGGAAGAA                       |

**Supplementary Table 17** Staple sequence for the 6HB-based octagonal DNA origami of 57-bp edge-length without internal mesh when using Design Type 1 shown in **Supplementary Fig. 26**. The sequence is represented by colors; unpaired nucleotides with blue, crossovers with orange, and the 14-nt seed dsDNA domain with green.

| Staple ID | Length (bp) | Staple sequences |
|-----------|-------------|------------------|
|-----------|-------------|------------------|

|    |    |                                                            |
|----|----|------------------------------------------------------------|
| 1  | 58 | CGTCATTTCTCAGCAGGAGTTAGGCCGTTTTGTGTATCACCGTTAAACAGTTATTAC  |
| 2  | 56 | TCATAGCCCCTTTTTAGCGTTTGGCGCCAAAGATTTTAAGGGCGACATTATTGCT    |
| 3  | 56 | CCACCGGAACTTTTCCCTCAGAGAAGACACCACTTTTATAAGTTTATTTGCTGT     |
| 4  | 56 | GGTCAGACGATTTTCCTTGATATGAAACGCAATTTTTAACGGAATACCCGCAAAT    |
| 5  | 56 | CTCAGAGCCGTTTTCAGAACCACAGTATGTTAGTTTTACGTAGAAAATATATAAC    |
| 6  | 56 | GTA CTGGTAATTTTTTTAAACGGGACTTGAGTTATTTTCCAATAATAAGAAATATCA |
| 7  | 56 | GCGCAGTCTCTTTTTTTACC GTTCGAAGCCCTTTTBTAGAAAAGTAAGCTCAATT   |
| 8  | 56 | AGCGACAGAATTTTGTTTGCCTTAAATTATTCATTTTAAGGTGAATTATAGCTTC    |
| 9  | 52 | CATTAGTTTTGCCGGAACGCCAGCAAATTTTTCAGTAGCACCAACGGATT         |
| 10 | 51 | AAGAATTTGGATATTACCCATACCGTAACACTGAGTTAGTAATCTATACCA        |
| 11 | 51 | CATGTTTTCTTAGCCTCTGTAGGATTTTGCTAAACAACGCGACCGCCAAAA        |
| 12 | 51 | CCTAATTTTCGAAAGATTTAATTATCGGTTTATCAGTCTCGAAGGCTAGACTG      |
| 13 | 49 | GAGAGATTTTTCAAGA AATGAAAGTACAGTACCAGGCGACGAGTAGA           |
| 14 | 48 | CGTCGAGAGGGTACCGCCCTTGAGTAACAGTTTCGGAAGCTGAGACTC           |
| 15 | 46 | CGCCACCCTAAAGGCTTTGAGATGGTTAATAGCGCTAGCAAGAA               |
| 16 | 46 | TTGACGGAAGCGTCAATGATACCGATAGTGAGGAAGTCAATTGAATCC           |
| 17 | 46 | ACAACAACCATGCTTTGATAAACAGTTCAGAATAATTCGCACCCTC             |
| 18 | 46 | TAGCGTAACGACCAACTTTACAGGTAGAAAGAACATTTCAAAGAA              |
| 19 | 46 | AAACGCACCGCCAAGAAAGGAACAACCTAACGGAGAACCCTCGTTT             |
| 20 | 46 | ATAATAATTTATTATACAAAACCAAATAGAAATATAATGTCACA               |
| 21 | 46 | AACCGACACAAACTAGCATTCCACAGAGGTGTACAACGAACTAAC              |
| 22 | 45 | GTAATTGTCAACTCTCATTGAGTGAATGAGCCAATACAGGAGT                |
| 23 | 45 | CTGAAAACGTTGGGTGACCTTCATCAAGTCGTACAGAATGGAAA               |
| 24 | 45 | ATTAGATTTTCATCAGGGAACCGAACTGATCTAAAAGGTTGAGGCA             |
| 25 | 45 | GAAGTTTCGAGGCAATTGTGTGAAATCCTTTCAAAGCCACCACC               |
| 26 | 45 | ATTGCTGCGAGAGGTTTGACCCCGAGCTTACGTAACAGAGCCA                |
| 27 | 45 | AGAGAGTTCCAATAACGTAATGCCACTATGCTTTGCGATTTTCGG              |
| 28 | 45 | CGCGTTAACGAGACAACGGGTACAGAGCGCCCAACCGTAATCAGT              |
| 29 | 42 | AGGTTTAGTTGATAAGCGGGGTTTTGCTTTAAGAGCCTATTA                 |
| 30 | 42 | TAAATCAAAGACTTTTTGGGAATTAGAGTACCAAGCTGAGG                  |
| 31 | 42 | GGCAACATTATGAAAGAGGATTTGATGAAACAGCCCATAGT                  |
| 32 | 42 | ACGACGACGATCAAGCGCGAATTTAAAGTACAAGGATGCGA                  |
| 33 | 42 | CCCAAATGCTTGACTAAAGATTTTTTTTCAATGCGCCCAATG                 |
| 34 | 42 | CCCGGAATAGGCCAGAAGCAAAGGATTAGGATTTAAGTATAG                 |
| 35 | 42 | CTACTAATTTTAGTAGCATTACACCCTGTTACCTTCAAATCA                 |
| 36 | 42 | GGTCAATTTTTGTTTAGCTATATTTTCTAATAAAGACCAG                   |
| 37 | 42 | AGTTGATTTTTAATTCTGCGAACGAGTAATACCAAGCGCAG                  |
| 38 | 42 | AGCTCAAATTTTTTTTAAATATGCAACTACTATCATATTTGTA                |
| 39 | 42 | CCTTTGTTTTGAGGTCATTTTTGCGGAGTTTTGCGAATACA                  |
| 40 | 42 | AAAGCGATTTTGACCGGAAGCAAACCTCTAAATATTTCCAT                  |
| 41 | 42 | GCATCAAATTTATTAAGAGGAAGCCCGAAAATCAAACAGCAT                 |
| 42 | 42 | ACAATGATTTGATGCACCCTCATTTTCAAAGCTGTTAATCA                  |
| 43 | 42 | ACGTAAACGGGATAGCGTCATACATGGCTAATAGCATCAGAGG                |
| 44 | 42 | TTGTGAAACAAGATAGCTATCTTACCCAGTAAGCAAGCCC                   |
| 45 | 42 | GTCAGGAGGTGGCAAGATAGCCGAACAATAAGCCAGTACA                   |
| 46 | 42 | GCGCATAACGCCTGAAATAAATCCTCATAGTTACCGCGCGAG                 |
| 47 | 42 | AACTACAGGCTGGCAAGAAAATCTACGATTTGGGAGAAGGA                  |

|    |    |                                             |
|----|----|---------------------------------------------|
| 48 | 42 | CTGGCATGACAGGATTTTGTGCTTTTCATCATAAGTTGAGA   |
| 49 | 42 | ACGGTCACAGACGTCGCGCCAGCATTGATTAAGTTTGACC    |
| 50 | 42 | TTTAGGAGATTTAGACTCCTTATTACGCCACCAGAGTAGTAAA |
| 51 | 42 | GGAATTACATTCCACATACATAAAGGTGCCCTCAGCAGTTTC  |
| 52 | 42 | TCATCGCTGAGAACTCTCAGAACCAGCAACATGTGTCTG     |
| 53 | 42 | AGCGGAGCTGATAATAGTAAGAGCAACAAGTACGATAAAAAG  |
| 54 | 42 | ATCAATACACCGGATGAAAATCTCCAAAACATCCTTTTGC    |
| 55 | 42 | CTAAAACAAAAAGGTTTATAATCAAAATGAAAATTGAGCTTA  |
| 56 | 42 | AAAAGAATGGCTTACATATGGTTTACCACATCTTCTCCAAA   |
| 57 | 42 | GATAGCGACCTTTACAACCGATTGAGGGTTCATCGGAGGTGA  |
| 58 | 42 | TAAACGGAACAGCGACTGTAGCGGTTAGGGAAGCAGGATT    |
| 59 | 42 | ATTTCTGTAAAACTGCGGAATCGTCAACAGGTGTAAATA     |
| 60 | 42 | ACCGACTGCAGCAGCATAACCGATATAAGGGTAGATGACCA   |
| 61 | 42 | CGGAACGTTCCGGTCTGAAACCATCGATATGAGCCACAAATAT |
| 62 | 41 | AATAGGACATTACATGCGATTTTAAGTGGCTCATTGAC      |
| 63 | 41 | TGAATTGGAACGAATCAACTAATGCATACATAACTGCTC     |
| 64 | 41 | AGGAGCCGGCAAAACAGAGGGGGTAATTTAAATGTTACCAA   |
| 65 | 41 | CTTGCAAGCGAAAAGGCTTTTACCCTGTATTATAGTGGGAT   |
| 66 | 39 | ATTGGGCTGCCCTGACGATTTAACACCACACCCAGAAC      |
| 67 | 39 | CTCAAGAGAAAGTGCCCTGCTATGCCCGTAACTCAGG       |
| 68 | 39 | TTCTGAAGTCAGTGCACCCTCAGAACCAGGAGATAAGTGC    |

**Supplementary Table 18** Staple sequence for the 6HB-based octagonal DNA origami of 57-bp edge-length without internal mesh when using Design Type 2 shown in **Supplementary Fig. 26**. The sequence is represented by colors; unpaired nucleotides with blue, crossovers with orange, and the 14-nt seed dsDNA domain with green.

| Staple ID | Length (bp) | Staple sequences                                           |
|-----------|-------------|------------------------------------------------------------|
| 1         | 58          | TAGTATTTAGCAACATAACGAAAAGGAATTAAATACCAAGCGCGCCACCAGCAACAAA |
| 2         | 56          | ATACATAAAGTTTTCAACATATAAGAAGCCCTTTTTTTAGAAAAGTAAGCTCAATT   |
| 3         | 56          | ACCGACTTGATTTTTTGGGAATTTGGCTTTTGATTTTTACAGGAGTGTATAAGTA    |
| 4         | 56          | GATTGAGGGATTTTAGGTAAATATAAACAGTGCCTTTTATAACAGTTAAGATTAG    |
| 5         | 53          | GCTACAAGCTTTGAAGCGACAGAATCAAGTTTGTTTTAGCGTCAGACTGACA       |
| 6         | 53          | ATGCCACCTGCTCCTCATAGCCCCCTTATTAGCGTTTTCCATCTTTTCCCTCA      |
| 7         | 53          | TAAAGGCTAATCTTTACCATTAGCAAGGCCGGATTTTTTCACCAATGACATTA      |
| 8         | 52          | AGAACTTTTTTGATTAAGAAGAAACGCAATTTTTAACGGAATACCAGCAAAT       |
| 9         | 51          | AGCTTTTTTTCGAAGGGCTTGATGGTTTAATTTCAATATCGGTGTAGCAT         |
| 10        | 51          | CTAAAATTTCTTTTTCTCATAAGAACCGAAGTACCAAGGCTTTTCGCGTT         |
| 11        | 49          | CTACTAATTTTAGTAGCATTACACCCTGACAACCTTCAACTGCCAGAGG          |
| 12        | 47          | GGAGGTTTTAGGCAGGTCAGATGCTGTAGCTCAATTTTTTTTAAATA            |
| 13        | 47          | GAGCCTTTTACCCTCAGAGCCTATAACAGTTGATTTTTAATTCTGCG            |
| 14        | 47          | AAGCCTTTTATGGAAAGCGCAATTGCTCTTTTGTGTTGAGGTCATT             |
| 15        | 46          | TCAGGACGTTGATTGCGATTAGTAAATGAATTAGCGCTAGCAAGAA             |



|    |    |                                                  |
|----|----|--------------------------------------------------|
| 16 | 46 | ATTCAGTGAAATGACAAGCAAGCCAATAGGGTTGATACTGGTAA     |
| 17 | 46 | AAATCCGCGACTACGAAATTATAGTCAGAAAGCATTCCAGCCACCA   |
| 18 | 46 | TCATACAAGAGCCAAACCAAATCAACGTACCGATACCACCACCCTC   |
| 19 | 46 | TTCATCAAGAAGCCTTTTGTAGTACCTTGAACCGCCACCAGGGAGT   |
| 20 | 46 | GAAAGATTCAATTAGCGAAGAAAATGTTTAGACTGGTGGCAAGATAGC |
| 21 | 46 | AAATCCTAACCATCCAGACCAGGCGCATCAGCGAAAACCTCCAACA   |
| 22 | 46 | TTCTGAAGTTTACCATTTTAAGAACTGGGAAAATCAAAGTTTTGTC   |
| 23 | 45 | CTCCTCAAAGAGCCCGGAGCCTTTAATTGCTTTTAAACATTCAACC   |
| 24 | 45 | CTGAAAAGGATAGCGATAAAAACCAAACAGTTGATAGAAAATAC     |
| 25 | 45 | TCGCTGAATTCATTGCAAAAATCACCAGTCGTTCCATTTAGTACCG   |
| 26 | 45 | CGGAACCCGCCACCTTTGACCATTAGATGTTTCAGATCTTTGACCC   |
| 27 | 45 | CGAGAGGAACCAATTAGTTGCGCCGACAAAGGCTTATCACCGTC     |
| 28 | 44 | TAAAGGAGGAAGAATTTATTTTGTCACAATCAATTTTTAATTCA     |
| 29 | 43 | AACGAGTAATAATCAAGAATACACTAAAGGAGATTAATCAC        |
| 30 | 43 | TGCAACTAGATTAAAGATTTCCATTAACGAACGAGCGTTTTTC      |
| 31 | 43 | TTTGCAGGACGGAAGCAGACAGCATCGGAACGGTGTAGATAGCA     |
| 32 | 42 | GAACAACTTAGTTTCAGCGGAGTGAGAAAACGAGCAAAGA         |
| 33 | 42 | GTTTCCAGACGATAATAATTTTTCACGTTCTCATTACCAG         |
| 34 | 42 | ACCGGATGGCTTGCTCAGAACCGCCACCCAGGAGGGTAAGCG       |
| 35 | 42 | CTACCCTGACTGCACCAACCTTTAACGAAAATAAATTGTCG        |
| 36 | 42 | GGAGGATTAGAGCGGGATCGTTTCCCTCAGAGGCTGTGACC        |
| 37 | 42 | ATTAGGGATACAACCATCGCTTTACGCATAAACAAATGCTC        |
| 38 | 42 | GAGAGATTTTTCAAGAAATGAAAGTAACGATCTTCCAAAA         |
| 39 | 42 | GGTCAATTTTTGTTTAGCTATATTTTCAATCGTCAACCCTC        |
| 40 | 42 | TAGCCCGTTTTAGGTGTATCACCGTACTCTCAGAGTATTCGG       |
| 41 | 42 | GATTAGCTTTTTGCTCAGTACCAGGATTTTCGTCTTAAA          |
| 42 | 42 | TCCACAGAGAGAAAGTCCCCCTGCCTATAAGGGCGATTGTG        |
| 43 | 42 | AAAAGGCTTATGCGAGCGCCAAAGACAATTCGGAAGCTGAGA       |
| 44 | 42 | AATTACTCCAAAATCATAGTTAGCGTATTAAGAAGCTATTA        |
| 45 | 42 | AACACTGCGGATAAGTCAGTGCCTTGAGTGACGGAACGAGTA       |
| 46 | 42 | ACAATGAGAAATAAGAAATCTACGTTAATTAGAAAAGTGGGATT     |
| 47 | 42 | CACCACGAATAGCATCAGAGGGTAATTGTCTGTAGAACAAC        |
| 48 | 42 | TTGCTAAACAAAATAGCTATCTTACCAAGAAAACACTAACG        |
| 49 | 42 | CGAACAAGCAAACGGATTTAGGAATACCAAGACGAGTCCAAT       |
| 50 | 42 | GTTTACCACATTACATACGCAGTATGTTAAGTTACCGCGCAG       |
| 51 | 42 | ACTGCGGATTTGGGAGAAGGAAACCGAGTCTTTACTAATG         |
| 52 | 42 | TAAGTTGGTGAAAGTCCCTGACGAGAAAATACCGAGTACCGT       |
| 53 | 42 | TCAGAGCAGAGCCAAACAAAGTACAACAACACTCAAACGAG        |
| 54 | 42 | AATGACCGATTTAGCTCAGAACCGCCACATAATCATGTATCA       |
| 55 | 42 | GAACCACTTTTCGATGTTACTTAGCCGGGGTAAAGATTGCA        |
| 56 | 42 | ATCGGCACACCAGAGTGTCTGGAAGTTCAAAGCATACGTA         |
| 57 | 42 | TCAAAAAGTACGGCCGCCGACGATTGTAGCGGCAGACA           |
| 58 | 42 | TTAATTCAATATAACGATTGGCCTTGATAATCAGTAGAGGAC       |
| 59 | 42 | GCACCGTATTCACAGAGCTTAATTGCTGGAGCTTCAAGCAACG      |
| 60 | 42 | AGATGAACGAGGGTAAAGCGAACCAGACTGGCTTAAACAAAT       |
| 61 | 42 | CAGCTTGCACCAGAAATTATTCATTAATTAACGGGGTGCCGT       |
| 62 | 41 | CAGATACCTATCATATAAATATTCATTATCCCCCTCAGGCA        |

|    |    |                                                                                         |
|----|----|-----------------------------------------------------------------------------------------|
| 63 | 41 | CGGTCA <sup>AA</sup> TGAGG <sup>AA</sup> GGAAGCCGAAACTTCAAAT <sup>AG</sup> AGGA         |
| 64 | 41 | GTAAT <sup>TG</sup> TGAAT <sup>TT</sup> CACCAGTACAAAACAACGC <sup>TT</sup> TATC          |
| 65 | 39 | GTAATAG <sup>TA</sup> GGCTTTTGC <sup>TTT</sup> AAGAAG <sup>TA</sup> TATTAGGTA           |
| 66 | 39 | CCAGCGATT <sup>C</sup> GAAATGCTTTAAACAACATTT <sup>CG</sup> CCTCCC                       |
| 67 | 39 | CCACCCTCAT <sup>AG</sup> TCTCTGAATTTA <sup>CA</sup> GCACC <sup>AG</sup> ACAAGA          |
| 68 | 36 | <sup>TAT</sup> GA <sup>CT</sup> TGAGTTA <sup>TTTT</sup> CCAATAATAAG <sup>AA</sup> TATCA |
| 69 | 25 | TCGCCT <sup>GG</sup> AGGCA <sup>AAAA</sup> AATCAGGT                                     |

**Supplementary Table 19** Staple sequence for the 6HB-based star DNA origami of 42-bp edge-length. The sequence is represented by colors; unpaired nucleotides with blue, crossovers with orange, and the 14-nt seed dsDNA domain with green.

| Staple ID | Length (bp) | Staple sequences                                                                                                                      |
|-----------|-------------|---------------------------------------------------------------------------------------------------------------------------------------|
| 1         | 58          | CATACAGCGTTTGC <sup>CG</sup> CCACC <sup>AT</sup> CAGAGCCACC <sup>ACC</sup> CGGAAC <sup>CG</sup> CATTTTCGTTATT<br>C                    |
| 2         | 58          | CTAATGCAGC <sup>TAT</sup> CAAAAATCAGGTGCGACC <sup>TATATCTGGT</sup> CAGTTAGGCGGTAAAA<br>G                                              |
| 3         | 58          | GAAGG <sup>TTTT</sup> TAAATATTGACGGAAAG <sup>TC</sup> CATAATCAAGGGATAGCAAG <sup>TT</sup> ATAGGAACC<br>C                               |
| 4         | 57          | CAAAGT <sup>TT</sup> AAGAA <sup>AC</sup> AAAAGAAGTTTTGCCAGAGGG <sup>TTTTTT</sup> GGTAATAGT <sup>AC</sup> TTTA                         |
| 5         | 57          | GGAATT <sup>AG</sup> GCGAC <sup>AG</sup> AGTTTCGT <sup>TAATCTTGACA</sup> AGAATTTTTTTCCGGATATTCAT                                      |
| 6         | 56          | AACAC <sup>CT</sup> CAAGA <sup>AG</sup> ATTTTGCTAAAC <sup>AG</sup> AGGTTTAGT <sup>TTTTTTTT</sup> ACCGCCACCCTC                         |
| 7         | 56          | TGACC <sup>CA</sup> ACT <sup>CG</sup> ATGCCACTACGA <sup>GA</sup> ACAGGTCAG <sup>TTTTTTT</sup> GATTAGAGAGTA                            |
| 8         | 56          | AGGCA <sup>TTTT</sup> GTCAGACGAT <sup>TG</sup> ATACA <sup>GT</sup> AATTACTAGAAAAAGAAG <sup>AA</sup> CAGTTT                            |
| 9         | 56          | AATCA <sup>TTTT</sup> GTTTTTTGGG <sup>GA</sup> GCGAA <sup>AGGC</sup> ATTTTCGAG <sup>CG</sup> GTTTAA <sup>AC</sup> GAGGTG              |
| 10        | 56          | CTCAAT <sup>TTTT</sup> CTATCGGCCT <sup>TA</sup> ACCA <sup>TT</sup> GAACAAGAAAA <sup>TA</sup> TATTCA <sup>AA</sup> CCCTCA              |
| 11        | 56          | CGCCATTT <sup>GCC</sup> ATTGCAACAGGA <sup>AT</sup> TCGAACCTCCTAATTGCTGAAT <sup>TT</sup> ATGCTGTA                                      |
| 12        | 56          | ATTAT <sup>TTTT</sup> TATCCCAAT <sup>CCT</sup> GAACTAAGAATACGTGG <sup>CT</sup> AGACT <sup>TC</sup> CCTAAAA                            |
| 13        | 56          | GAACC <sup>TTT</sup> CTAAAGGGAGCCCCG <sup>AG</sup> TTAGACAGTAGATACATTT <sup>TT</sup> AATGGTCA                                         |
| 14        | 56          | AGCGC <sup>TTTT</sup> AAAGACAAA <sup>GG</sup> AGCCA <sup>GG</sup> CAAGACAAGA <sup>ACT</sup> ATTAAT <sup>TC</sup> CAGTAC               |
| 15        | 56          | TAATT <sup>TAC</sup> AGTA <sup>AA</sup> TCGGTTTATCAG <sup>CC</sup> GCGAGCTGA <sup>TTTTTTT</sup> AAAGGTGGCATC                          |
| 16        | 56          | GTCAA <sup>TTT</sup> AAATGAAAATAGCAG <sup>CA</sup> TAACGCAATAAATATCGCGT <sup>TT</sup> ATTTCGAGC                                       |
| 17        | 56          | GAGGT <sup>GG</sup> GCAA <sup>TT</sup> TGTGTGCAAA <sup>TC</sup> CTTTACCCTG <sup>TTTTTTT</sup> ACTATTATAGTC                            |
| 18        | 56          | AATAG <sup>AA</sup> TCAAT <sup>AG</sup> GCCGCTTTTGC <sup>GG</sup> ACGGTGTCTG <sup>TTTTTTT</sup> GAAGTTTCATTC                          |
| 19        | 55          | CACCT <sup>TTT</sup> GCTGAACC <sup>TA</sup> CGAGGCGCAG <sup>TT</sup> TCAAT <sup>CC</sup> AGTGA <sup>TT</sup> GGCTTGCCCT               |
| 20        | 55          | ATTAA <sup>AC</sup> CCCTGCCTATT <sup>TCT</sup> CAGAG <sup>GT</sup> CACCGGAACCAGA <sup>AT</sup> TCTTT <sup>TC</sup> ATAGCC             |
| 21        | 55          | AACCGT <sup>TTTT</sup> TATCAGGGCG <sup>AT</sup> AACCA <sup>CT</sup> ACCAGTATAAAG <sup>CA</sup> ATCGC <sup>GA</sup> TAATAA             |
| 22        | 54          | CTACC <sup>TAG</sup> GCCGGAACGT <sup>CT</sup> CAATA <sup>GCA</sup> AAGTGCTCATTATAAGG <sup>GA</sup> AGCAT                              |
| 23        | 54          | TATGCGTTA <sup>TT</sup> AATTC <sup>TC</sup> ACACCTGCGCT <sup>TCT</sup> GAA <sup>TT</sup> CGTTCAGTAA <sup>ATA</sup> AAA                |
| 24        | 54          | AATGGCTAT <sup>TT</sup> CTTTAA <sup>AG</sup> ACGATAAAA <sup>CA</sup> ATAACT <sup>TT</sup> AAACAGGGAA <sup>GT</sup> TAAAC              |
| 25        | 54          | AAAGTACCG <sup>TT</sup> AAGGT <sup>ACC</sup> GCAC <sup>TC</sup> GAGA <sup>AA</sup> CGGGG <sup>TT</sup> CCGGCGAACG <sup>TA</sup> ATCG  |
| 26        | 54          | AAATATATT <sup>TT</sup> TAAT <sup>TG</sup> TATAAT <sup>TT</sup> AAT <sup>GG</sup> GTGAAT <sup>TT</sup> CACCGTCACC <sup>GG</sup> GAGG  |
| 27        | 54          | GTTCAG <sup>AGA</sup> ATCC <sup>CC</sup> AGTGCCACG <sup>TC</sup> GAGAG <sup>TT</sup> AGCAA <sup>AA</sup> AACCATT <sup>TT</sup> AGCAG  |
| 28        | 53          | TCCTC <sup>TTT</sup> ATTAAAGCCAGAATGG <sup>TG</sup> ATAAGTGC <sup>CG</sup> T <sup>CG</sup> ATAAAT <sup>CG</sup> GAAA                  |
| 29        | 52          | TGAAATG <sup>TT</sup> ATTTA <sup>CA</sup> AGAAT <sup>TT</sup> TAAAG <sup>CA</sup> AATACT <sup>TT</sup> ATTTTGACGCT <sup>TA</sup> TTAC |

|    |    |            |           |             |                |              |                    |          |
|----|----|------------|-----------|-------------|----------------|--------------|--------------------|----------|
| 30 | 52 | AGAATCAA   | GAAACGA   | ACGAGTAG    | ATGTTAGCAA     | ACGTATTTTTTT | GAAAATA            |          |
| 31 | 51 | CACCGA     | ATAAGTTT  | ATTTTTTT    | GTCACA         | AACCAATGT    | GAAAAATCGAGAGA     |          |
| 32 | 51 | GCGGGG     | TCTCCTC   | ATACTATGG   | TGCTTTGACGAG   | CTTTTTTT     | ACGTATAA           |          |
| 33 | 51 | ATTCTA     | AATCAGATA | ATGAAATAG   | CAATAGCTATCT   | TTTTTTTT     | TACCGAAG           |          |
| 34 | 51 | TAAACA     | GTCTCGT   | CATCGTAG    | GAATCATTACCG   | CGTTTTTT     | CCCAATAG           |          |
| 35 | 51 | ACAAAC     | AGGAATC   | AGAGTGTACT  | GTTTTTTT       | GTAATAAG     | TTTTAACGGTTG       |          |
| 36 | 51 | AATTCG     | AGAAAGC   | GCCCTGAACA  | ATTTTTTT       | AGTCAGAG     | GGTAATTGCCAT       |          |
| 37 | 51 | CAAGATTA   | TTTTTTT   | GTTGCTATTTT | GCCAGAAGGA     | AAAAGAA      | CCTACGTT           |          |
| 38 | 51 | GCAATT     | CTAAGT    | CCCAATAAT   | CGGTTTTTTT     | CTGTCTTT     | CCTATCAAGAA        |          |
| 39 | 51 | CCCTTA     | GTCCAAT   | CCAAAATCACC | TTTTTTT        | AGTAGCACC    | ATTACCTTACC        |          |
| 40 | 51 | TTTATAAT   | TTTTTTT   | CAGTGAGGCC  | CACCACGCGAGG   | CTTGAAG      | CTCCTGAA           |          |
| 41 | 51 | TGAATA     | TAGGCAG   | AGGAGCGGG   | CGTTTTTTT      | CTAGGGCG     | GTGGCAAA           | CCCCA    |
| 42 | 51 | GTTGTTCC   | TTTTTTT   | AGTTTGG     | AACAAGGGCCGATT | ATCCTGA      | GCATCACG           |          |
| 43 | 51 | CGCTCC     | TTTTTTT   | T           | CAGAGCCGCCACTG | CTCAGTAAG    | ATAGGCGTGGAC       |          |
| 44 | 50 | GCGGAATCG  | TTAAAT    | ATTCATTA    | ATACCTTATTT    | GCGATTTT     | AATTTT             |          |
| 45 | 50 | AGATAA     | TTTAC     | TTTGA       | AATACTAATT     | CTCATCAG     | AGGATCGAAAG        |          |
| 46 | 50 | GAAGGA     | TTT       | GCGAATT     | ACATCGGAACG    | ATTAGCA      | CTTTTGTGGCTTA      |          |
| 47 | 50 | CAGAAATTT  | AAAGAAA   | CTTGAT      | ACCGATTTG      | CGCAGTAG     | TAGTTG             |          |
| 48 | 50 | TGAATA     | TTT       | ACCTTGCT    | TGTAGCATTCCA   | TT           | CAGCCGAGCCATCCTCAT |          |
| 49 | 49 | ACGGAGATTT | GTAT      | TGATAA      | ACAACAGTTGAAAG | TTGGAAG      | GTTATCTA           |          |
| 50 | 49 | AGTTTCC    | ATTAAT    | ATACGT      | ATATTAAT       | CCTTTT       | TCGTTATTAATTT      |          |
| 51 | 49 | CGGTCG     | CTGAGGC   | TAGTTAA     | ATAATCCT       | GATTGTT      | TATACTTCTGAATA     |          |
| 52 | 49 | AAAGGCT    | CCAAAA    | TAATTG      | TCAGTACCTTTT   | ACTTTGAA     | ACAATAACGG         |          |
| 53 | 49 | GACGTTAG   | TAAAT     | TGTATG      | GAACAAAATTA    | TTTACA       | ATTTTCAATTTG       |          |
| 54 | 49 | AACGGTGT   | ACAGAT    | ATAGGC      | TGAAAACATAG    | CGATTGATTA   | AAGACGCTG          |          |
| 55 | 49 | GAATT      | TTTTTTT   | ACGAGGC     | ATAGTAAGT      | AGGAATACC    | TTTTTTCATTCAA      |          |
| 56 | 49 | GCTCAACAT  | GAAGACA   | GT          | CATCATATTCCT   | GAATATCC     | CATCCATCGTC        |          |
| 57 | 48 | GCGTC      | TTTTTTT   | AGACTGT     | AGCGGTTT       | ATAAAGGT     | TTTTTCAACAT        |          |
| 58 | 48 | ATAAAC     | AGAGCGC   | TACGACC     | AGTAATAAA      | ACATTAT      | TTTTTTCATGAGGA     |          |
| 59 | 48 | GACAGG     | AGGGTC    | AATGG       | TTGAAATACT     | AATGGAT      | GTCGCTTTCCA        |          |
| 60 | 48 | TGAGTA     | GATTCCA   | AGACA       | ATAAACAAC      | AGAACCT      | ATAACCGATATATT     |          |
| 61 | 48 | TGAGAT     | TAGCAAC   | AAACAT      | CGCCATTAAG     | AGCAC        | TGAAACAAAGTACA     |          |
| 62 | 47 | ACCATG     | ATAGCA    | ACTTCT      | TTTTTGATTAGTA  | ACCAAGT      | AAAGTAAT           |          |
| 63 | 47 | TTTCAA     | ACCGCC    | ACCAGAA     | TTT            | CACCACCAGAG  | AGTGCCCTCATCTT     |          |
| 64 | 47 | ACTTCA     | AA        | CGAACAACAT  | TTT            | ATTACAGGTAG  | GGTTTACCTGCGCGA    |          |
| 65 | 47 | GAGCT      | GACGAG    | CGTCTTT     | TTT            | CAGAGCCTAA   | TAACCCACATTGGCA    |          |
| 66 | 45 | AGAAGCAA   | GCAAGCG   | CAACA       | CTAATAGAT      | GCCCTAAC     | TATCAT             |          |
| 67 | 45 | CCTTTA     | AATTGT    | AAAGA       | CTCATTTT       | GCGGAACC     | AGTCA              | CAATATCA |
| 68 | 45 | TTCAAAG    | CGAG      | GCAAAG      | GATTTAG        | AGTATACAGAC  | AGACGGGA           |          |
| 69 | 45 | CATATA     | ACAGCC    | ACGCACCAT   | ATCAAATTAAG    | ACGACGA      | CGAACGGG           |          |
| 70 | 45 | AATTCT     | ACTAAC    | GTTGAAT     | ACCAAGTTACA    | ACAACG       | TGGTCACG           |          |
| 71 | 45 | ATAACCT    | GTTAA     | ACAAG       | TGCGTAGATTTT   | CAAGTAAT     | AAAGGAAG           |          |
| 72 | 45 | AGAACC     | GCCAA     | AGTTAAC     | AGTACATAAATA   | AAATTT       | AGTGCCTT           |          |
| 73 | 45 | AGGAAC     | TTAAAGG   | AATCGGC     | TCCCTTAG       | AGGGTT       | TATAAGTATA         |          |
| 74 | 45 | AGCATGT    | AGCTGGT   | ATATG       | CAACTAAAGT     | GATCGT       | CGATGATG           |          |
| 75 | 45 | TACCCAA    | ATCACTTT  | GATTAT      | CAAAATCAT      | AGGCTT       | AAACCGAA           |          |
| 76 | 44 | CTTGAG     | AA        | CACCA       | GCAAGAC        | ACCACGGT     | AATCAGTCCAATACT    |          |
| 77 | 44 | AAACTA     | CTAACAC   | TTTCA       | ACCGATTG       | AGACTT       | GAACTTTTTT         |          |
| 78 | 44 | CAGCGG     | ATAGGT    | GATAT       | TTCACAACA      | AGCGTCA      | TTTAGTATCA         |          |

|     |    |                                              |
|-----|----|----------------------------------------------|
| 79  | 44 | CGAAAGAAACCAGACAACGATTTTTTGTGCATTAAATTTTTTG  |
| 80  | 44 | AATTTCTTAGCTATGCCGTAAGCACTAGGCGAGAGAGAATAT   |
| 81  | 43 | GCCCCGAAGTGAGAAAATTACCTGAGCAAAGCCTGTACATGGC  |
| 82  | 43 | GACGAGAATGGTTTAAAGAACTGGCTCATTGATAGCGTAGCGAC |
| 83  | 43 | ATGTACCGAACGCCCTGTAAATCGTCGCGGAGAACCATTTG    |
| 84  | 42 | CAAACCCTCTGCAACTCAAATGATACATAACGCCCAGTATT    |
| 85  | 42 | CGCTACATCAAAGGAAAAGAAATAGCCGCCAGGCAGGATTA    |
| 86  | 42 | AATAAAAGCTTTTGAAGTAAGCAGCTTTACAGAGAGCAAAATA  |
| 87  | 42 | TCTTACCAAGAAAATAGAAAGGCAAACGCTCATGGCCAATAA   |
| 88  | 42 | CAAATTATTATTTTATAAATCAGATTTAGAGCTTGCAAGCAA   |
| 89  | 42 | TCCAACGGGGCGCAGAGAGAAGGAAAAGCGCAGTCTAATGCGC  |
| 90  | 42 | CTGACCACAATATATAGCGTAACGATCTCCCTCAGCAGCATT   |
| 91  | 42 | ACTGATATAGAGCCCCAGCGATTATACCGGATTGCATCAGT    |
| 92  | 42 | AACACCGTCAATCAGCTCCATGTTACTTACCATAATTAAACA   |
| 93  | 42 | GATTCAAAAGAAAGAGGCTTTGAGGACCTCCTTTTACAAA     |
| 94  | 42 | GAATTAATAATAAGCGGAAGCAAACCTCCGCACCAATACAAAC  |
| 95  | 42 | GCGAGAGCGAACTATAACGGAATACCCAACCGAGGAGCCGAA   |
| 96  | 42 | TTTTGATGGCCTTGATCACCGTACTCAGACTTTCATGATGAA   |
| 97  | 42 | TCTGTCCTTTGCAACAACAACCATCGCTTGATTCACTTGCC    |
| 98  | 42 | TAAGAGCAACGCTAACTTGCGGGAGGTTGTTTTAGATCCGGT   |
| 99  | 42 | CTGACCAAACGTAATAAATTCATATGGTATTAGCATTTTAAC   |
| 100 | 42 | TTTTTTATAGTAGCTACGTGAACCATCGTGTAGCCAACAGT    |
| 101 | 42 | GGAAGAATCGAGGTATTTTTCATTTGGGGTTGCTTTCGTGAGA  |
| 102 | 42 | GCCGTTTACC GTT GACGGTACGCCAGAAAAGGGATCGGGAGC |
| 103 | 41 | TGCAAATAATCCTTGGCTGACCTTCATCAAGAGCATAAATTTT  |
| 104 | 41 | AACTTTTATTGTGAATACGAGAATGAGCCGGACAAATAT      |
| 105 | 41 | AACCCTCAAAGATTCATCAAAAAGATTATTTGACCGTCAAT    |
| 106 | 41 | GAGAGATTTGCCAGTGATAAGAGGTCATGGCTACACCACCA    |
| 107 | 41 | TATTAATAAACATCCCAATTCTGCGAACGACAATGGTAAAA    |
| 108 | 41 | CTGCGCGTGGCCATAGCATTTCGAAATTGCGACAGAGG       |
| 109 | 41 | GAGTAAACCGCCGCAACCGCCACCCTCATCATAGTTGTGAG    |
| 110 | 40 | AAATATCTTTAGAAATACCGAACGAACCACCTATAAAACA     |
| 111 | 40 | AAAAGTTTGAGTAAGGGACATTCTGGCCAACCTAACCCCTC    |
| 112 | 40 | ATGGAAGGGTTATGTTTCAGCTAATGCAGAACTTTATCAAC    |
| 113 | 40 | ATTCGCCTGATTAATTGAGAATCGCCATATTTCCAACATG     |
| 114 | 40 | AATTACCTTTTCGACCGTGTGATAAATAAGTTAAGAATA      |
| 115 | 40 | AGAAGAGTCAATTTAGGTTGGGTTATATAACTAATGCTGA     |
| 116 | 40 | ATAAAAGTTTGCAAATGTTTAGACTGATACCAGATTGGG      |
| 117 | 39 | CCCTTTTACACCCAGCTTTTTTTACAATTTTACTTAAAT      |
| 118 | 39 | GCAGCGATTTTAAATATCCAGAACAATCATAATTTACG       |
| 119 | 39 | CAAGCAAGAGAGTAAAAATTTTTTGGAGTCTGTCAAGTGTT    |
| 120 | 39 | CGTGCTTGAAGTCCACTTTTTTTATTAAGAAGTTGAGT       |
| 121 | 39 | GCTGAGATTCCTCAGAAATTTTTTCCGCCACCCCGGAAC      |
| 122 | 36 | TTAAGACTTTTTTTCCTTATTACGCAGTTATCAGGA         |
| 123 | 30 | CGTTGGTTTTTTAAGAAAAATGGCATGA                 |
| 124 | 27 | AGGGCTTGCTTTGAAATCTCCAAAAA                   |
| 125 | 27 | CTCCGGCAGTGAATAAGAGGACAGATG                  |
| 126 | 26 | AACATGAAAGTTTTTTTATTAAGAG                    |
| 127 | 25 | CCCTTATTCATCGTATTATTCTGA                     |

**Supplementary Table 20** Staple sequence for the 6HB-based curved beam DNA origami of 42-bp edge-length. The sequence is represented by colors; unpaired nucleotides with blue, and crossovers with orange, the 14-nt seed dsDNA domain with green, and the 4-nt dsDNA domain with red.

| Staple ID | Length (bp) | Staple sequences                                                                                             |
|-----------|-------------|--------------------------------------------------------------------------------------------------------------|
| 1         | 60          | CTAACTCACG <b>GT</b> <b>AAAACGAACTAA</b> <b>CA</b> TACCA <b>GAGCTGCATTAATGA</b> AGCACTGCCCGC<br>TT           |
| 2         | 59          | ATGAATT <b>TTTT</b> <b>TGTATGGGATTTT</b> <b>GC</b> AGAACCGCCAT <b>TTTT</b> CTCAGAGCCAC <b>CG</b> TTAGTA<br>A |
| 3         | 59          | AGGGAGCCCC <b>TTTTT</b> TTAGAG <b>CC</b> ACCAACCTAAT <b>TTTAAAGAGGCAAAGAAT</b> <b>AAA</b> ATA<br>T           |
| 4         | 58          | GTTTTCCAG <b>TTTTT</b> CGACGTTGTA <b>AAAGGGATGTGC</b> <b>TTTTTT</b> TGCAAGGC <b>GC</b> ACACG                 |
| 5         | 58          | AATCA <b>GT</b> <b>TATCAAATCAT</b> <b>TT</b> CTGAGAGACTAC <b>CA</b> ATGGAA <b>ACTTTTT</b> CATAAATCA          |
| 6         | 58          | GATTAT <b>CGAGCCGGAAGCAT</b> <b>TT</b> GTGTAAAGCCT <b>GC</b> AGGAAGAT <b>TTTTT</b> CTCCAGCCA                 |
| 7         | 58          | GGCTAC <b>AA</b> TAGAG <b>GG</b> GAACCG <b>TTTT</b> CTCAGAGCCGC <b>CT</b> TTTT <b>CATTTTTT</b> CAAAATC       |
| 8         | 58          | AATCG <b>CAACGTTATTAATTTT</b> AAGTTTGAGTAA <b>CG</b> GAATTGAG <b>TTTTT</b> GTTATCTAA                         |
| 9         | 57          | CAGGAAAA <b>CT</b> GAAAGCGTAAGAT <b>ACGTGGCACAGACAAT</b> <b>TTT</b> AATAT <b>CA</b> CTTTCA                   |
| 10        | 56          | <b>ACGT</b> TACCAGCG <b>CC</b> GAGCA <b>CT</b> TGAGG <b>CTTGCAGGA</b> AGTT <b>TT</b> CCAAATCAAATAGC          |
| 11        | 55          | GTTGCGCTTATCGGCC <b>TGGTGCCTCATTATTACAGGTAG</b> ATTT <b>AA</b> ACGCGCGGG                                     |
| 12        | 55          | AGTCAAT <b>TG</b> AGTGA <b>AA</b> TATGC <b>GT</b> TATACAA <b>ATTCTTTA</b> ACCAAT <b>TG</b> AACGCCATCA        |
| 13        | 55          | CGCGAGGCGT <b>TTTT</b> CGAACCTCCCG <b>ATT</b> TACGCCAAC <b>TTTT</b> ATGTAATT <b>CT</b> TAAAT                 |
| 14        | 55          | TCATT <b>CG</b> TTTAT <b>CAGCCTAATTTGCCAGTTAC</b> GAAGATTG <b>TT</b> AGCAAATATTT                             |
| 15        | 55          | GATTGTTTGG <b>TTTT</b> ACTTCTGAATA <b>ATT</b> TGAGAGCC <b>TTTT</b> AGCAGCAA <b>ATTA</b> ACA                  |
| 16        | 55          | TTCCAC <b>AG</b> CACCG <b>CAATACCGAACGAACCACC</b> ACCGTGCAT <b>CT</b> CAGTTTGAGGG                            |
| 17        | 55          | AAATCC <b>TT</b> AGGAG <b>CCAGTACCTTTTACATCGGGACA</b> ACCCG <b>TT</b> ATTCTCCGTGG                            |
| 18        | 55          | TATCT <b>TAGTGTACTGGTAATG</b> AGTTA <b>ATATGGTTGCTTTGAC</b> AAAGA <b>CG</b> AAAATT                           |
| 19        | 55          | ATATATTTTAT <b>TTTTTTT</b> CATCTTCT <b>GGT</b> CGAATTAT <b>TTTTT</b> CATTTCA <b>AA</b> TACCA                 |
| 20        | 54          | AAGAG <b>TG</b> CAAAAGAAGTT <b>TTTGCCAGAGGGGTAATAGTAG</b> ACCAG <b>GT</b> CCCTTA                             |
| 21        | 54          | CCCTG <b>AG</b> GCATAGTAAGAG <b>TCAACACTATCATAACCCTCGA</b> CAAAG <b>CT</b> GCAGCA                            |
| 22        | 54          | TTATG <b>CG</b> AAAAGATTCATCAT <b>GTTGAGATTTAGGAATACC</b> ATTAATT <b>TG</b> CCAGGG                           |
| 23        | 54          | CGCGTTT <b>TTTTT</b> TCGAG <b>CTTCAAAGCA</b> CGAAG <b>GTTGACGGGGAAAGCT</b> TTAGTT                            |
| 24        | 54          | TCGCC <b>TT</b> CTTTACCCTGACT <b>TATTATAGTCAGAAGCAAAGG</b> CGAAA <b>CA</b> ATCAAG                            |
| 25        | 54          | GGGAA <b>CT</b> AAATATTCATTG <b>TAATCCCCCTCAAATGCTTTAG</b> CCGGAA <b>GA</b> ACGT                             |
| 26        | 54          | AAGGTGAATAATTCTACT <b>TTAGTAGTAGCATTGTAAA</b> ACT <b>GT</b> TCTAT <b>CT</b> GTGTGC                           |
| 27        | 52          | GTCAGACGAT <b>TTTTT</b> C <b>TTGATATTCACAAGGAA</b> ACCGAGGA <b>ATT</b> CAATAAT                               |
| 28        | 52          | CGCAGTATGT <b>TTTTT</b> CAAACGTAGAAA <b>TGGTATTA</b> AA <b>CCAAGTT</b> CGCACTC                               |
| 29        | 51          | ACACTGA <b>TTTTTTT</b> G <b>TTTCGT</b> CACCAGTAAATCTACGTTA <b>AT</b> AACGCCAGG                               |
| 30        | 51          | AACGG <b>AT</b> TGAGCGCT <b>TTTTT</b> TCAGAGAGATA <b>ACC</b> CA <b>CT</b> ACCAG <b>AA</b> ACAAAT             |
| 31        | 51          | GGAT <b>AA</b> AGTATT <b>TTTTT</b> TACAAACAAT <b>TG</b> ATTAGAGC <b>TTTTTT</b> CAATAGAT                      |
| 32        | 51          | CCACC <b>AC</b> GCGTTTT <b>TTTTT</b> G <b>CATTTTCGGT</b> CATAG <b>CA</b> GAGCC <b>AA</b> CCGGAA              |
| 33        | 51          | AGAG <b>GG</b> AAAACA <b>TTTT</b> ATAGCTTAGAT <b>TT</b> AAATCGT <b>TTTTT</b> TATTAATTA                       |
| 34        | 51          | ACAG <b>GA</b> CCGAAG <b>TTTT</b> TTAAGAAAAG <b>TA</b> ATAAGAGC <b>TTTTT</b> GAAACAATG                       |

|    |    |                                                    |
|----|----|----------------------------------------------------|
| 35 | 51 | ATCGAGCAACATGTTTTTTTAATGCAGAACGCGCTAAGAACGACATACA  |
| 36 | 51 | TAAACCATGTAGTTTTAATCAATAATCGCTGAACAATTTTTAAAATAATA |
| 37 | 50 | AGTTTTCAAAAATGTTTTAAAATAGCAAATAAGAAACGATTTTTGTTTA  |
| 38 | 50 | CCGTATCATTACCATTTTTTAGCAAGGTAGAGCCAGCAATTTTCCAGTA  |
| 39 | 49 | AGAGCTAGTAAGCGTGCAGCGAACACCCGCCGCGCTTAATTTGCCGCTA  |
| 40 | 49 | CAGGCAACCGATTTTTGGAGGGAAGGTAATATTGTGGGAATCCGGAAA   |
| 41 | 48 | CCCCTACGTTGAACCATCACCCAAAAGTACAACGGAGTTTTGTATCA    |
| 42 | 48 | TTGGAACAAGTAGTCCACTATTAACGAGGCGCAGACGGTTAATCATAA   |
| 43 | 48 | TGGTGGTTCCTGAAATCGGCAAAACGCATAGGCTGGCTTTCCTTCATC   |
| 44 | 48 | TCACCGCCTGTGCCCTGAGAGAGTTGCTCATTCAAGTATTAAGGCTTG   |
| 45 | 48 | GAGAGGCGGTTTTGCATTGTTGGGCCAACTTTAATCATTTTGAATTACC  |
| 46 | 47 | AGTCTTTCAAACGTGAGAAATAGAAAGGAACCTAAAGGAAGAATA      |
| 47 | 47 | GACGACGACATCGGCAGAACTGGCTCATTGGAACAATAGAGTGAG      |
| 48 | 47 | GTGTACAAATGTTAGGAATCATTACCGCGCCTTTTAGCAAGCA        |
| 49 | 47 | CAACGTATTTACCATAAATAATGTAATGCTTTTTTGCAAATCC        |
| 50 | 47 | AGATGGTCATTCAACCAGAAGGAGCGGAATTATTTTTATATTCCT      |
| 51 | 46 | TTCTGGCCAACTTGACGCGCGTAACGATCTAAAAGCCCACAGTGCC     |
| 52 | 46 | AGGAGCGGGTTTTGGGCGCTGGCAAGTGAAGTTTTTCCATATAA       |
| 53 | 45 | TCCAGAACCCTCAGCAGGTCGACTCTAGGATCCCCGGGGAAG         |
| 54 | 45 | CGAAAGGCGACGGCATAGGAACCCATGTATAGTTATCAATCGTCT      |
| 55 | 45 | CAATAAAACAAGCCTGCGGAATCGTACGAACGTGTTGTTCCAGT       |
| 56 | 45 | TATATTGGGTGACGACGATTATACCAAGCCGGATTGGTTGAGGCAG     |
| 57 | 45 | AGGGTAAATACCCAAATCAAAAATCAGGGATAAATAGGGCGATGG      |
| 58 | 45 | CAGTTGATTCAAGGGAAGTTTCCATTAACGCCAACAGGAACCGC       |
| 59 | 45 | ATGTACCAACGTCACGCCATGTTACTTAAACAGTTCCTCTATTA       |
| 60 | 45 | ACTGTAACCAGAGCGCCCGAAAGACTTCCACTAAAGGAACCCTAA      |
| 61 | 45 | TGCTTTCCTTTTTAGAAATCAGAGCATCCTGATTTTACCAACGCTA     |
| 62 | 45 | CGTCACCCATTAAATAGCCGAACAAAGTAAGAATTTATTATTATA      |
| 63 | 45 | CTTTTTTTTTTAAAGCGAGAGGCTTTTAATCTTGTCTGTTTGA        |
| 64 | 45 | ACAGGAACGTTTCGCCAGAATCCTCGGAATTTTTTACTAGAAA        |
| 65 | 45 | GTTGAAATTATCAAAAAGGAATTACGACGAGAAATGATTGCCCT       |
| 66 | 45 | AAAGAGTCTTTTCATCACGCAAAATAGATTTTTTTTTAACGTCA       |
| 67 | 45 | CATCACTTGTTGAGTAGAAGAAATGCGCTTTTGATAGCCCTA         |
| 68 | 44 | AAGACTTTTTTACGTACCTTTAATTTTTCTTTGGAGGCTTTGTA       |
| 69 | 44 | AATTGACCAGGCAATTTTTCGCCATTTCGCCATGGTCAAGTTTA       |
| 70 | 44 | TGAGGCGCATTAAATTTCTGGTGCCGGAATTATCCGTATAATCCT      |
| 71 | 44 | ACTGTTGTACCGAGAGAACCGCCACCCTCTAAACACAGAACAAT       |
| 72 | 44 | CCTGATTACAGTAACTAACAACATAACGACAACTTTTTTCAA         |
| 73 | 44 | AAATTGTAATTGAGTGACCAACTTTGAAAGTCCAATAAGCCGT        |
| 74 | 44 | ACGAGCGTCCAATCCAGCCTTTACAGAGAGGGCAACATTCCTTA       |
| 75 | 44 | GATAAGTGCTGTCTATAAAAAGAAACGCAAAGATTTTCGGAATA       |
| 76 | 44 | AAAATAATTGCGAAAACAAGAACCAGGATACCAAAATCCTCCGG       |
| 77 | 44 | AAGCCTGTAGTAGGGAGGCAGAGGCATTTCCGGTATGAGAAG         |
| 78 | 44 | GCTCAACTAGTATCTAACCTTGCTTCTGAGACGCTCTAAGAA         |
| 79 | 44 | GAACAAACGCAACAGCCACCAGAACGAGTAAACGCCTTTTGCG        |
| 80 | 44 | GATGAATATGCTTTGATTACCTGAGCAAAAGAGAAAATCGTATT       |
| 81 | 44 | GCCCAATAAGCAGAGCCAGAATGGAAAGCGCAGTTTTGAATTTA       |
| 82 | 44 | AAACATCGCGTCAGTATGAAAAATCTAAAGTCATCACTCACAA        |
| 83 | 44 | TTGCCATACCCTAGTCAGGATTAGAGATGAGGAAGAAAGCGAA        |

|     |    |                                               |
|-----|----|-----------------------------------------------|
| 84  | 43 | CATATGGAATTTTGTAAACGGGGTCAGTGCTCGGTCGGTATAACG |
| 85  | 43 | AAAATTATGGAAGGATAAGTATAGCCCGTTGCGAAAGTAATAA   |
| 86  | 43 | AATATCTTTTGCCCGAAGACAAAGAACGCGAAGATGGGATTCTG  |
| 87  | 43 | TGACCATTTATACATTTTCGCAAATGGTCACTAAATCACTCA    |
| 88  | 43 | CGACCGTACCTAAATTAGGATTAGCGGCCTTTAAACCGAGTA    |
| 89  | 43 | TGAGAATTTTATATTTAACAAGTTGCTATTTAAAGGTAGTTGC   |
| 90  | 43 | AGTTACTTTTCGCGCAGAGGGATAAATAATGAGGCCTTGATC    |
| 91  | 43 | CCGCCTTTTTAGTGCCACGCTGCACGTAATTTGATTTAATAAT   |
| 92  | 43 | ATCAAGACTTGCGGTCCGAACCTATTATATACCGAGATTTTAG   |
| 93  | 43 | ATATATGTAGTGAAATATATAGAAGGCTTATCGAGCCAGCCAAC  |
| 94  | 43 | GCTTCCGCAACATACAGATGATGGCAATCATCACACAGAGG     |
| 95  | 42 | ACAGTTCACCTCCTCGAATTCGTAATTCAGGGCTATT         |
| 96  | 42 | GCCGACAGCCTATGAGGTTTTGCTAATTTACGAGAGTTAAT     |
| 97  | 42 | TCGAGAAGCCTTGAATGTAGCAATACTTCAACAGAACCATATC   |
| 98  | 42 | GGTTATGAGAAGGTTAATGGTCTTAGAATCCTCTGAGAC       |
| 99  | 42 | TTTTTCAGGTTGATGTTAGAACCTTGAGGATTTAGAGTGCCG    |
| 100 | 42 | GTACCGCCAGCGGAATCGGCCTTGCTGGTTTGAATCTGCGCA    |
| 101 | 42 | TGGGAAGAAACAGATTCACCAACCTGTCGTGCCTCAGGACGT    |
| 102 | 42 | GAGCTGATTTTTGGTGGCATCTATCACCGTCACCATCGATA     |
| 103 | 42 | AGAAAAGTTTTCAAAAACAGAAAATAAACAGCTAAAACAG      |
| 104 | 42 | TTGTTAATTTTTAGCTCATTTTACCAGTATAAAGTAATAAG     |
| 105 | 42 | CATTAAATTTTTGAGCGAGTAAGAAACAATAACATGAAACAA    |
| 106 | 42 | GTAGATGTTTTGCATCGTAAGCAGAAGATAAATTGCTGAAC     |
| 107 | 42 | AAGCTTGATTACGCGAACCTTCTGACCGCTCATGTCGTCTT     |
| 108 | 42 | TTTTTTGTCAATTTGACAGAATCAAGTTACAGGAGCATCAA     |
| 109 | 42 | TCTTTGAAAGAGGAACGCCGCCAGCATTGGCCTTTAGTTTAGC   |
| 110 | 42 | AAGATTACCCCAAGGTGCCGTAAGCAATAACCTGCGTCAG      |
| 111 | 42 | CACCTCCCCCTTATGCGAACGAGTAGACGGCGAATACGTAA     |
| 112 | 42 | GCAAACGGTAAAACGTGGCGAGAAAGGCCAATTCTTAGCGT     |
| 113 | 42 | TTGCGGAACGAGGGGTCACGCTGCGGTATGCAACTGCTGTA     |
| 114 | 42 | GCTCAAACCTAATTGCTGAATATAGAGCCACCACCGTCATTT    |
| 115 | 42 | GGATAGCAGTTTTGGAAATACCTACATTAGAGATACAGCTGG    |
| 116 | 42 | GGACTCCCGGTTGATTAACGTAACACCAATTAAGACAGAAAA    |
| 117 | 42 | AAATCCGGACCATAAAAGAAGTGGCATGCTGTAACACAATCAT   |
| 118 | 42 | CGAGAACTGACCTGAAGGGCGAAAAACCAAGCATGTAAGTCAG   |
| 119 | 42 | AAATCCATATGAAACGACTTGAGCCATTACGGAAAGAGTTAA    |
| 120 | 42 | TAAATCATCGCATTAGGTAAGTAATTCTTCATCTAGACTG      |
| 121 | 42 | TTTTATTTGTCCAGTATTTTGTAAAAAAGAAATGAACG        |
| 122 | 42 | GATAGCGAGGACAGAGCCCGAGATAGGGACGTTAAACGACGA    |
| 123 | 42 | TAAAGTAATAACACATATTATTTATCCTTTCCAGAACAATA     |
| 124 | 42 | GCCCCATGACAAAAACAGGAGGCGGATTTGACCGCCTTAA      |
| 125 | 42 | AGCGGTCCAGCTTTTACATTTAACAATTGGGTTAGACGACG     |
| 126 | 42 | CTTAGGTTTCATTGCGCTTCCCTGTAGCCACGCTGCCAAAT     |
| 127 | 42 | ATAAAAATTCATTAGTTTGCCCGCAGCGCGTCTGAATTAC      |
| 128 | 42 | TCCTCAACAGCTTGGTTTTATAATCAGGCGGTTAGAAATAC     |
| 129 | 42 | TGGTTTAGGTCAACAATATCTGGTCAGGAAACCCTAATGC      |
| 130 | 42 | GAACAAATGGCAAGACCGTAATGGGATTCTTTTGGGCTTG      |
| 131 | 42 | AGATACAGTAAATACCAGTGAGACGGGGCGGATATCAACA      |
| 132 | 41 | GGCGATTTTTGTGCGGGCCTTTCGTCATGCCTTTTTCAG       |

|     |    |                                          |
|-----|----|------------------------------------------|
| 133 | 40 | GCACGTTTTAAATAACCACCAAGACAGCATCGGATGGCTT |
| 134 | 39 | TTGCGGGATTCACCCTCACATACATGGCTTTTGATGAT   |
| 135 | 39 | CCCACGCATCCGATATATCTTGAGTAACTTTGCCCGTA   |
| 136 | 39 | TGAATTTCTAACAGCTTGTCTGAAACATTTTAGTATTA   |
| 137 | 39 | AAAAAAGGCTCAAAAGGAGGGTTTTGCTCTTTACCAGGC  |
| 138 | 39 | ACCGGAACCAATAAAGTACGGTGTCTGTAGCGTAGCAAC  |
| 139 | 39 | AAATAGCTAAAAAGGGCGACATTCGCGTACAGGCCGCTT  |
| 140 | 39 | TCCCATCAACCAGCTACAATTTGGGAGCTCAACCATCG   |
| 141 | 39 | ATTTTCCTAATAAGAATAAACAGAGAAGCTTTTCGAGG   |
| 142 | 39 | AATACATTATAAAGAAATTGCGTAACCGTAATCTCCAA   |
| 143 | 38 | GGTGTTTTACCGTACTCAGGATAGCTGTTTTGTGTGA    |
| 144 | 38 | CGCCTGTAGTTTTTTTCCACAGACAGCCCTCACCGTA    |
| 145 | 38 | GAAATGGATTTTTTTTTATTACATTGGCAAACACTACAA  |
| 146 | 37 | TGCCACTGAACCAGCCACCCTCAGAGCCTTACCAGAA    |
| 147 | 32 | TCCAGTCGGGAAGTATTAAGTTGATTAATTGC         |
| 148 | 27 | GCAGCACCTTTTTCAGTAGCGGGGCGC              |
| 149 | 27 | GGAAGCGCTTTTGACGGGAGATAATC               |
| 150 | 27 | AGAATATATTTTACCGACAAAATAATT              |
| 151 | 27 | ACATCAAGTTTTCAAATTAACATCAA               |
| 152 | 27 | CTCAAATATTTTACCCTCAATGTTGGT              |
| 153 | 22 | ATTACCGCCTTTCCATTGCAA                    |
| 154 | 21 | ACCAGTATTTTTAAAGGGACA                    |
